# Supplementary material for: The Genomic Landscape of Compensatory Evolution
Source: PLoS Biol. 2014 Aug 26;12(8):e1001935. doi: 10.1371/journal.pbio.1001935 (PMC4144845; doi:10.1371/journal.pbio.1001935)
Supplement: Table S1 — Fitness of strains in various environments. The table includes fitness values of ancestor and evolved strains as measured in liquid YPD and in different agar media. Pleiotropy measures and GO process terms of the deleted genes are also presented. (XLSX) [file pbio.1001935.s006.xlsx]

## Sheet: Legend
This file contains information on the fitness of the evolved strains in various environments
	Legend for the sheets "Data-lines-fitness-compensation"
			Column name	Variable description
			Name of evolutionary line	Name of evolutionary line
			Systematic gene name	The systematic gene name of the gene that was deleted in the given strain
			Growth rate at start	Growth rate value at the start of the lab evolutionary experiment
			Growth rate at end	Growth rate value at the end of the lab evolutionary experiment
			Is compensated at end	Did compensation happen? (for definition, see Methods)
			Genome sequence	Describes whether the genome sequence of the given evolved line was determined
			Microarray profile	Describes whether the microarray profile of the given evolved line was determined
	Legend for the sheets "Fitness_in_liquid_YPD-lines"
			Column name	Variable description
			Name of evolutionary line	Name of evolutionary line
			systematic gene name	The systematic gene name of the gene that was deleted in the given strain
			colony size at start	Colony size at the start of the lab evolutionary experiment in the condition indicated above the column
			colony size at end	Colony size at the end of the lab evolutionary experiment in the condition indicated above the column
			colony size at start compared to WT	Comparison of the knock-out fitness with the wild type at the start of the evolutionary experiment in the condition indicated above the column. (-1 knock-out is slower, 0 no significant difference, 1 knock out is faster)
			colony size at end compared to start	Comparison of the evolved knock-out fitness with the unevolved state of the same line in the condition indicated above the column. (-1 evolved is slower, 0 no significant difference, 1 evolved is faster)
			For a detailed desciption of the different growth media see Supplementary Table 1.
	Legend for the sheets "Data-ORF"
			Column name	Variable description
			Systematic gene name	The systematic gene name of the gene that was deleted in the given strain
			Growth rate at start	Growth rate value at the start of the lab evolutionary experiment
			Growth rate at end mean	Mean growth rate value of all evolved lines with the same original gene knonk-out at the end of the lab evolutionary experiment
			Growth rate at end max	The largest growth rate value of all evolved lines with the same original gene knonk-out at the end of the lab evolutionary experiment
			Is compensated at end in any line	Did compensation happen in any of the replicate lines with the same original gene knock-out? (for definition, see Methods)
			Environmental pleiotropy	Number of unique conditions in which the removal of the gene resulted in a fitness defect according to Dudley et al. (9)
			Network pleiotropy	Number of protein-protein interactions the gene product is involved in as reported in the BioGRID database (16)
			Multifunctionality	Multifunctionality of the gene as defined by Myers et al.(17)
			GO process terms	Name of the biological process the gene product is involved in

## Sheet: Fitness_in_liquid_YPD-lines
Name of evolutionary line	systematic gene name	Growth rate at start	Growth rate at end	is compensated at end	genome sequence	microarray profile
YBL099W_evolved1	YBL099W	0.693507	1.11165	1	0	0
YBL099W_evolved2	YBL099W	0.693507	0.894531	1	0	0
YBL099W_evolved3	YBL099W	0.693507	0.944194	1	0	0
YBL099W_evolved4	YBL099W	0.693507	0.969214	1	0	0
YBR026C_evolved1	YBR026C	0.709649	0.913103	1	0	0
YBR026C_evolved2	YBR026C	0.709649	1.1599	1	0	0
YBR026C_evolved3	YBR026C	0.709649	0.879083	1	0	0
YBR026C_evolved4	YBR026C	0.709649	0.94235	1	0	0
YBR037C_evolved1	YBR037C	0.85171	0.906827	0	0	0
YBR037C_evolved2	YBR037C	0.85171	0.942485	0	0	0
YBR037C_evolved3	YBR037C	0.85171	0.891775	0	0	0
YBR106W_evolved1	YBR106W	0.785271	1.19609	1	0	0
YBR106W_evolved2	YBR106W	0.785271	1.2118	1	0	0
YBR106W_evolved3	YBR106W	0.785271	1.36876	1	0	0
YBR106W_evolved4	YBR106W	0.785271	1.41675	1	0	0
YBR163W_evolved1	YBR163W	0.808826	0.82601	0	0	0
YBR163W_evolved2	YBR163W	0.808826	0.940421	1	0	0
YBR163W_evolved3	YBR163W	0.808826	1.4179	1	0	0
YBR173C_evolved1	YBR173C	0.722786	1.01752	1	0	0
YBR173C_evolved2	YBR173C	0.722786	1.03766	1	0	0
YBR173C_evolved3	YBR173C	0.722786	1.0401	1	0	0
YBR179C_evolved1	YBR179C	0.710573	0.825784	1	0	0
YBR179C_evolved2	YBR179C	0.710573	0.706141	0	0	0
YBR181C_evolved1	YBR181C	0.857029	0.866599	0	0	0
YBR181C_evolved2	YBR181C	0.857029	1.2341	1	0	0
YBR181C_evolved3	YBR181C	0.857029	1.0585	1	0	0
YBR181C_evolved4	YBR181C	0.857029	0.894419	0	0	0
YBR189W_evolved1	YBR189W	0.861845	1.23534	1	0	0
YBR189W_evolved2	YBR189W	0.861845	1.1168	1	0	0
YBR189W_evolved3	YBR189W	0.861845	1.21671	1	0	0
YBR189W_evolved4	YBR189W	0.861845	1.30429	1	0	0
YBR200W_evolved1	YBR200W	0.728254	1.107	1	0	0
YBR200W_evolved2	YBR200W	0.728254	0.942854	1	1	0
YBR200W_evolved3	YBR200W	0.728254	0.974972	1	1	0
YBR221C_evolved1	YBR221C	0.523402	0.978483	1	0	0
YBR221C_evolved2	YBR221C	0.523402	0.930628	1	0	0
YBR221C_evolved3	YBR221C	0.523402	0.98471	1	0	0
YBR221C_evolved4	YBR221C	0.523402	0.953691	1	0	0
YBR267W_evolved1	YBR267W	0.73885	1.06686	1	0	0
YBR267W_evolved2	YBR267W	0.73885	0.8286	0	1	0
YBR267W_evolved3	YBR267W	0.73885	1.34074	1	1	0
YBR267W_evolved4	YBR267W	0.73885	1.47686	1	0	0
YBR282W_evolved1	YBR282W	0.756498	0.874124	1	0	0
YBR282W_evolved2	YBR282W	0.756498	0.847861	0	0	0
YBR282W_evolved3	YBR282W	0.756498	0.871533	1	0	0
YBR282W_evolved4	YBR282W	0.756498	0.954893	1	0	0
YCR024C_evolved1	YCR024C	0.714745	0.862231	1	0	0
YCR024C_evolved2	YCR024C	0.714745	0.993366	1	0	0
YCR024C_evolved3	YCR024C	0.714745	0.861627	1	0	0
YCR028C_evolved1	YCR028C	0.772081	0.884759	1	0	0
YCR028C_evolved2	YCR028C	0.772081	0.902048	0	0	0
YCR028C_evolved3	YCR028C	0.772081	0.894651	1	0	0
YCR028C_evolved4	YCR028C	0.772081	0.860496	0	0	0
YCR028C-A_evolved1	YCR028C-A	0.718746	0.694183	0	0	0
YCR071C_evolved1	YCR071C	0.752633	1.13997	1	0	0
YCR071C_evolved2	YCR071C	0.752633	0.843702	0	0	0
YCR071C_evolved3	YCR071C	0.752633	0.847708	0	0	0
YCR071C_evolved4	YCR071C	0.752633	0.894731	0	0	0
YCR094W_evolved1	YCR094W	0.849977	0.906346	0	0	0
YCR094W_evolved2	YCR094W	0.849977	0.940516	0	0	0
YCR094W_evolved3	YCR094W	0.849977	0.946753	0	0	0
YCR094W_evolved4	YCR094W	0.849977	1.06462	1	0	0
YDL006W_evolved1	YDL006W	0.82806	1.11215	1	0	0
YDL006W_evolved2	YDL006W	0.82806	1.02149	1	0	0
YDL020C_evolved1	YDL020C	0.873876	0.89299	0	0	0
YDL020C_evolved2	YDL020C	0.873876	0.913177	0	0	0
YDL020C_evolved3	YDL020C	0.873876	0.967878	0	0	0
YDL047W_evolved1	YDL047W	0.686363	0.750217	0	0	0
YDL047W_evolved2	YDL047W	0.686363	0.790437	1	0	0
YDL047W_evolved3	YDL047W	0.686363	1.06964	1	0	0
YDL047W_evolved4	YDL047W	0.686363	0.780373	0	0	0
YDL075W_evolved1	YDL075W	0.893006	0.802761	0	0	0
YDL075W_evolved2	YDL075W	0.893006	0.811316	0	0	0
YDL075W_evolved3	YDL075W	0.893006	0.80562	0	0	0
YDL081C_evolved1	YDL081C	0.843348	0.803253	0	0	0
YDL081C_evolved2	YDL081C	0.843348	0.850839	0	0	0
YDL081C_evolved3	YDL081C	0.843348	0.813184	0	0	0
YDL081C_evolved4	YDL081C	0.843348	0.856988	0	0	0
YDL082W_evolved1	YDL082W	0.880545	1.13304	1	0	0
YDL082W_evolved2	YDL082W	0.880545	1.19792	1	0	0
YDL082W_evolved3	YDL082W	0.880545	0.93507	0	0	0
YDL082W_evolved4	YDL082W	0.880545	1.12237	0	0	0
YDL090C_evolved1	YDL090C	0.841798	0.847319	0	0	0
YDL090C_evolved2	YDL090C	0.841798	0.932809	0	0	0
YDL090C_evolved3	YDL090C	0.841798	0.86833	0	0	0
YDL090C_evolved4	YDL090C	0.841798	0.949024	0	0	0
YDL115C_evolved1	YDL115C	0.798098	1.5425	1	0	0
YDL115C_evolved2	YDL115C	0.798098	1.24865	1	0	0
YDL115C_evolved3	YDL115C	0.798098	1.17876	1	0	0
YDL115C_evolved4	YDL115C	0.798098	1.74229	1	0	0
YDL130W_evolved1	YDL130W	0.885633	1.11889	1	0	0
YDL130W_evolved2	YDL130W	0.885633	1.05483	1	0	0
YDL130W_evolved3	YDL130W	0.885633	1.04844	1	0	0
YDL151C_evolved1	YDL151C	0.6752	0.844206	1	0	0
YDL151C_evolved2	YDL151C	0.6752	0.904666	1	0	0
YDL151C_evolved3	YDL151C	0.6752	0.769734	1	0	0
YDL151C_evolved4	YDL151C	0.6752	0.763621	0	0	0
YDL160C_evolved1	YDL160C	0.776126	0.864914	0	0	0
YDL160C_evolved2	YDL160C	0.776126	0.908456	0	0	0
YDL160C_evolved3	YDL160C	0.776126	0.895484	1	0	0
YDL160C_evolved4	YDL160C	0.776126	0.927994	1	0	0
YDL185W_evolved1	YDL185W	0.841748	0.912125	0	0	0
YDL185W_evolved2	YDL185W	0.841748	0.918078	0	0	0
YDL192W_evolved1	YDL192W	0.839799	0.884927	0	0	0
YDL192W_evolved2	YDL192W	0.839799	0.914333	0	0	0
YDL192W_evolved3	YDL192W	0.839799	0.905024	0	0	0
YDL198C_evolved1	YDL198C	0.835569	0.865551	0	0	0
YDL198C_evolved2	YDL198C	0.835569	0.863678	0	0	0
YDL198C_evolved3	YDL198C	0.835569	1.69443	1	0	0
YDL198C_evolved4	YDL198C	0.835569	1.81854	1	0	0
YDR017C_evolved1	YDR017C	0.692814	0.917268	1	0	0
YDR017C_evolved2	YDR017C	0.692814	0.910308	1	0	0
YDR017C_evolved3	YDR017C	0.692814	1.70294	1	0	0
YDR065W_evolved1	YDR065W	0.76439	0.956978	1	0	0
YDR065W_evolved2	YDR065W	0.76439	0.940257	1	0	0
YDR065W_evolved3	YDR065W	0.76439	0.813875	0	0	0
YDR065W_evolved4	YDR065W	0.76439	0.784266	0	0	0
YDR136C_evolved1	YDR136C	0.885952	0.995418	0	0	0
YDR136C_evolved2	YDR136C	0.885952	1.05158	1	0	0
YDR136C_evolved3	YDR136C	0.885952	1.00041	0	0	0
YDR136C_evolved4	YDR136C	0.885952	0.983461	0	0	0
YDR176W_evolved1	YDR176W	0.877084	0.919593	0	0	0
YDR176W_evolved2	YDR176W	0.877084	0.920187	0	0	0
YDR176W_evolved3	YDR176W	0.877084	0.917169	0	0	0
YDR176W_evolved4	YDR176W	0.877084	0.989054	0	0	0
YDR204W_evolved1	YDR204W	0.847394	0.966681	0	0	0
YDR204W_evolved2	YDR204W	0.847394	1.71985	1	0	0
YDR207C_evolved1	YDR207C	0.838315	0.883962	0	0	0
YDR207C_evolved2	YDR207C	0.838315	0.858399	0	0	0
YDR207C_evolved3	YDR207C	0.838315	0.870334	0	0	0
YDR207C_evolved4	YDR207C	0.838315	0.914274	0	0	0
YDR226W_evolved1	YDR226W	0.798465	0.825027	0	0	0
YDR226W_evolved2	YDR226W	0.798465	1.01146	1	0	0
YDR237W_evolved1	YDR237W	0.808695	0.889775	0	0	0
YDR237W_evolved2	YDR237W	0.808695	0.922749	1	0	0
YDR237W_evolved3	YDR237W	0.808695	0.902543	0	0	0
YDR237W_evolved4	YDR237W	0.808695	0.906846	0	0	0
YDR241W_evolved1	YDR241W	0.863692	1.09757	1	0	0
YDR241W_evolved2	YDR241W	0.863692	0.976704	0	0	0
YDR241W_evolved3	YDR241W	0.863692	0.964704	0	0	0
YDR322W_evolved1	YDR322W	0.86936	0.915172	0	0	0
YDR322W_evolved2	YDR322W	0.86936	0.94929	0	0	0
YDR322W_evolved3	YDR322W	0.86936	0.869616	0	0	0
YDR322W_evolved4	YDR322W	0.86936	0.942208	0	0	0
YDR363W_evolved1	YDR363W	0.867073	1.02472	1	0	0
YDR363W_evolved2	YDR363W	0.867073	0.965328	0	0	0
YDR363W_evolved3	YDR363W	0.867073	1.0775	1	0	0
YDR363W_evolved4	YDR363W	0.867073	0.940086	0	0	0
YDR369C_evolved1	YDR369C	0.804529	0.915899	1	0	0
YDR369C_evolved2	YDR369C	0.804529	0.875007	0	0	0
YDR369C_evolved3	YDR369C	0.804529	0.859938	0	0	0
YDR375C_evolved1	YDR375C	0.886248	0.955383	0	0	0
YDR375C_evolved2	YDR375C	0.886248	0.959314	0	0	0
YDR375C_evolved3	YDR375C	0.886248	0.90199	0	0	0
YDR382W_evolved1	YDR382W	0.712533	1.04125	1	0	0
YDR382W_evolved2	YDR382W	0.712533	0.712224	0	0	0
YDR382W_evolved3	YDR382W	0.712533	0.744291	0	0	0
YDR432W_evolved1	YDR432W	0.5793	0.953858	1	0	0
YDR432W_evolved2	YDR432W	0.5793	0.93529	1	0	0
YDR432W_evolved3	YDR432W	0.5793	0.761467	1	0	0
YDR432W_evolved4	YDR432W	0.5793	0.732342	1	0	0
YDR450W_evolved1	YDR450W	0.888301	1.0221	0	0	0
YDR450W_evolved2	YDR450W	0.888301	0.996352	0	0	0
YDR450W_evolved3	YDR450W	0.888301	1.03236	0	0	0
YDR484W_evolved1	YDR484W	0.870314	1.03153	1	0	0
YDR484W_evolved2	YDR484W	0.870314	1.00054	1	0	0
YDR484W_evolved3	YDR484W	0.870314	1.05428	1	0	0
YDR484W_evolved4	YDR484W	0.870314	1.05111	1	0	0
YDR507C_evolved1	YDR507C	0.873449	0.923881	0	0	0
YEL027W_evolved1	YEL027W	0.763026	0.795282	0	0	0
YEL027W_evolved2	YEL027W	0.763026	0.814105	0	0	0
YEL027W_evolved3	YEL027W	0.763026	0.808536	0	0	0
YEL044W_evolved1	YEL044W	0.870223	0.899729	0	0	0
YEL044W_evolved2	YEL044W	0.870223	0.818576	0	0	0
YEL044W_evolved3	YEL044W	0.870223	0.87084	0	0	0
YEL044W_evolved4	YEL044W	0.870223	0.969261	0	0	0
YEL051W_evolved1	YEL051W	0.781169	0.850696	0	0	0
YEL051W_evolved2	YEL051W	0.781169	0.781277	0	0	0
YER014C-A_evolved1	YER014C-A	0.797326	0.844821	0	0	0
YER014C-A_evolved2	YER014C-A	0.797326	0.817101	0	0	0
YER014C-A_evolved3	YER014C-A	0.797326	0.905941	0	0	0
YER014C-A_evolved4	YER014C-A	0.797326	0.85991	0	0	0
YER014W_evolved1	YER014W	0.737916	1.21943	1	0	0
YER016W_evolved1	YER016W	0.853239	1.03489	0	1	0
YER016W_evolved2	YER016W	0.853239	1.08102	1	0	0
YER016W_evolved3	YER016W	0.853239	1.04583	1	1	0
YER016W_evolved4	YER016W	0.853239	1.21118	1	1	0
YER017C_evolved1	YER017C	0.809588	0.815967	0	0	0
YER017C_evolved2	YER017C	0.809588	0.810782	0	0	0
YER017C_evolved3	YER017C	0.809588	0.868951	0	0	0
YER074W_evolved1	YER074W	0.837592	0.896995	0	0	0
YER074W_evolved2	YER074W	0.837592	0.88213	0	0	0
YER074W_evolved3	YER074W	0.837592	0.869254	0	0	0
YER074W_evolved4	YER074W	0.837592	0.897905	0	0	0
YER083C_evolved1	YER083C	0.847034	1.04973	1	1	0
YER083C_evolved2	YER083C	0.847034	1.08514	0	0	0
YER083C_evolved3	YER083C	0.847034	1.03632	1	1	0
YER083C_evolved4	YER083C	0.847034	1.254	1	1	0
YER087W_evolved1	YER087W	0.723188	0.939152	1	0	0
YER087W_evolved2	YER087W	0.723188	0.852028	1	0	0
YER087W_evolved3	YER087W	0.723188	0.772059	0	0	0
YFL023W_evolved1	YFL023W	0.895329	0.881522	0	0	0
YFL023W_evolved2	YFL023W	0.895329	0.889403	0	0	0
YFL023W_evolved3	YFL023W	0.895329	0.893058	0	0	0
YFL023W_evolved4	YFL023W	0.895329	0.915298	0	0	0
YFR001W_evolved1	YFR001W	0.66149	0.941289	1	0	0
YFR001W_evolved2	YFR001W	0.66149	0.973829	1	0	0
YFR001W_evolved3	YFR001W	0.66149	0.849238	0	0	0
YGL020C_evolved1	YGL020C	0.885592	0.971302	0	0	0
YGL020C_evolved2	YGL020C	0.885592	1.03763	1	0	0
YGL020C_evolved3	YGL020C	0.885592	1.10125	1	0	0
YGL070C_evolved3	YGL070C	0.529599	1.10842	1	0	0
YGL070C_evolved1	YGL070C	0.529599	0.80939	1	1	1
YGL070C_evolved4	YGL070C	0.529599	0.826429	1	0	0
YGL070C_evolved2	YGL070C	0.529599	0.941779	1	1	0
YGL076C_evolved1	YGL076C	0.855401	1.03705	1	0	0
YGL076C_evolved2	YGL076C	0.855401	0.937915	0	0	0
YGL076C_evolved3	YGL076C	0.855401	0.991067	1	0	0
YGL076C_evolved4	YGL076C	0.855401	0.920378	0	0	0
YGL095C_evolved1	YGL095C	0.640807	0.544712	0	0	0
YGL105W_evolved1	YGL105W	0.828119	1.03929	0	0	0
YGL105W_evolved2	YGL105W	0.828119	0.826337	0	0	0
YGL105W_evolved3	YGL105W	0.828119	0.831576	0	0	0
YGL105W_evolved4	YGL105W	0.828119	1.53832	1	0	0
YGL163C_evolved1	YGL163C	0.854008	0.970424	1	0	0
YGL163C_evolved2	YGL163C	0.854008	0.904097	0	0	0
YGL163C_evolved3	YGL163C	0.854008	0.858573	0	0	0
YGL163C_evolved4	YGL163C	0.854008	0.8685	0	0	0
YGL211W_evolved1	YGL211W	0.839012	0.895657	0	0	0
YGL211W_evolved2	YGL211W	0.839012	0.90194	0	0	0
YGL211W_evolved3	YGL211W	0.839012	1.05362	1	0	0
YGL211W_evolved4	YGL211W	0.839012	1.0465	0	0	0
YGL219C_evolved2	YGL219C	0.788284	1.01604	1	1	0
YGL219C_evolved3	YGL219C	0.788284	0.991661	1	1	0
YGL219C_evolved4	YGL219C	0.788284	1.0124	1	1	0
YGL219C_evolved1	YGL219C	0.788284	1.05803	1	1	1
YGL223C_evolved1	YGL223C	0.587124	0.88246	1	0	0
YGL223C_evolved2	YGL223C	0.587124	0.500756	0	0	0
YGL223C_evolved3	YGL223C	0.587124	0.566834	0	0	0
YGL240W_evolved1	YGL240W	0.466462	1.09232	1	0	0
YGL240W_evolved2	YGL240W	0.466462	0.731644	1	0	0
YGR092W_evolved1	YGR092W	0.787202	0.979628	1	0	0
YGR092W_evolved2	YGR092W	0.787202	0.976858	1	0	0
YGR092W_evolved3	YGR092W	0.787202	1.0202	1	0	0
YGR092W_evolved4	YGR092W	0.787202	1.20272	1	0	0
YGR101W_evolved1	YGR101W	0.747055	1.98327	1	0	0
YGR101W_evolved2	YGR101W	0.747055	0.849573	0	0	0
YGR101W_evolved3	YGR101W	0.747055	0.799106	0	0	0
YGR104C_evolved2	YGR104C	0.622977	0.762111	1	1	0
YGR104C_evolved1	YGR104C	0.622977	1.02718	1	1	1
YGR104C_evolved3	YGR104C	0.622977	1.32787	1	0	0
YGR104C_evolved4	YGR104C	0.622977	0.783593	1	1	0
YGR105W_evolved1	YGR105W	0.828647	0.845892	0	0	0
YGR105W_evolved2	YGR105W	0.828647	0.889929	0	0	0
YGR105W_evolved3	YGR105W	0.828647	0.885914	0	0	0
YGR105W_evolved4	YGR105W	0.828647	0.898138	0	0	0
YGR159C_evolved1	YGR159C	0.749598	0.771975	0	0	0
YGR159C_evolved2	YGR159C	0.749598	0.762366	0	0	0
YGR159C_evolved3	YGR159C	0.749598	0.701143	0	0	0
YGR159C_evolved4	YGR159C	0.749598	0.768947	0	0	0
YGR215W_evolved1	YGR215W	0.767987	0.887714	1	0	0
YGR215W_evolved2	YGR215W	0.767987	0.894374	1	0	0
YGR215W_evolved3	YGR215W	0.767987	0.87094	0	0	0
YGR215W_evolved4	YGR215W	0.767987	0.903868	1	0	0
YGR229C_evolved1	YGR229C	0.896978	0.951881	0	0	0
YGR229C_evolved2	YGR229C	0.896978	0.977971	0	0	0
YGR229C_evolved3	YGR229C	0.896978	0.985465	0	0	0
YGR229C_evolved4	YGR229C	0.896978	0.936101	0	0	0
YGR252W_evolved1	YGR252W	0.786704	0.955512	1	0	0
YGR252W_evolved2	YGR252W	0.786704	0.971417	1	0	0
YGR252W_evolved3	YGR252W	0.786704	0.984863	0	0	0
YGR272C_evolved1	YGR272C	0.648324	0.590026	0	0	0
YGR272C_evolved2	YGR272C	0.648324	0.59301	0	0	0
YGR272C_evolved3	YGR272C	0.648324	0.817294	1	0	0
YGR285C_evolved1	YGR285C	0.662814	0.72035	0	0	0
YGR285C_evolved2	YGR285C	0.662814	0.697558	0	0	0
YGR285C_evolved3	YGR285C	0.662814	0.691213	0	0	0
YGR285C_evolved4	YGR285C	0.662814	0.70079	0	0	0
YHL011C_evolved1	YHL011C	0.803065	0.882881	0	0	0
YHL011C_evolved2	YHL011C	0.803065	0.929828	1	0	0
YHR004C_evolved1	YHR004C	0.770244	0.957441	1	0	0
YHR004C_evolved2	YHR004C	0.770244	0.992825	1	0	0
YHR004C_evolved3	YHR004C	0.770244	0.985238	1	0	0
YHR034C_evolved1	YHR034C	0.882591	1.03597	1	0	0
YHR034C_evolved2	YHR034C	0.882591	1.06868	1	0	0
YHR034C_evolved3	YHR034C	0.882591	1.13499	1	0	0
YHR034C_evolved4	YHR034C	0.882591	1.01279	1	0	0
YHR041C_evolved1	YHR041C	0.755473	0.953237	1	0	0
YHR041C_evolved2	YHR041C	0.755473	0.839505	0	0	0
YHR041C_evolved3	YHR041C	0.755473	0.930153	1	0	0
YHR041C_evolved4	YHR041C	0.755473	0.956233	1	0	0
YHR059W_evolved1	YHR059W	0.668853	1.13599	1	0	0
YHR059W_evolved2	YHR059W	0.668853	1.05273	1	0	0
YHR059W_evolved3	YHR059W	0.668853	1.32524	1	0	0
YHR067W_evolved1	YHR067W	0.619771	1.04389	1	0	0
YHR067W_evolved2	YHR067W	0.619771	1.49529	1	0	0
YHR067W_evolved3	YHR067W	0.619771	1.45732	1	0	0
YHR147C_evolved1	YHR147C	0.812806	1.023	1	0	0
YHR147C_evolved2	YHR147C	0.812806	0.865883	0	0	0
YHR147C_evolved3	YHR147C	0.812806	0.9015	0	0	0
YHR147C_evolved4	YHR147C	0.812806	0.911774	0	0	0
YHR168W_evolved1	YHR168W	0.797037	0.882634	0	0	0
YHR168W_evolved2	YHR168W	0.797037	0.85991	0	0	0
YHR168W_evolved3	YHR168W	0.797037	0.883255	0	0	0
YHR168W_evolved4	YHR168W	0.797037	0.925223	0	0	0
YIL008W_evolved1	YIL008W	0.867151	1.40868	1	0	0
YIL008W_evolved2	YIL008W	0.867151	0.858714	0	0	0
YIL008W_evolved3	YIL008W	0.867151	0.875982	0	0	0
YIL040W_evolved1	YIL040W	0.894122	0.956017	0	0	0
YIL040W_evolved2	YIL040W	0.894122	0.977495	0	0	0
YIL040W_evolved3	YIL040W	0.894122	0.976652	0	0	0
YIL040W_evolved4	YIL040W	0.894122	0.977656	0	0	0
YJL029C_evolved1	YJL029C	0.880545	1.02586	1	0	0
YJL029C_evolved2	YJL029C	0.880545	0.967951	0	0	0
YJL029C_evolved3	YJL029C	0.880545	0.994226	0	0	0
YJL029C_evolved4	YJL029C	0.880545	1.08092	1	0	0
YJL046W_evolved1	YJL046W	0.693786	1.01994	1	0	0
YJL046W_evolved2	YJL046W	0.693786	1.07347	1	0	0
YJL046W_evolved3	YJL046W	0.693786	1.73341	1	0	0
YJL047C_evolved1	YJL047C	0.853115	0.959733	0	0	0
YJL047C_evolved2	YJL047C	0.853115	0.983395	1	0	0
YJL047C_evolved3	YJL047C	0.853115	1.01879	1	0	0
YJL062W-A_evolved1	YJL062W-A	0.848823	1.08011	1	0	0
YJL115W_evolved1	YJL115W	0.781671	0.861754	0	0	0
YJL115W_evolved2	YJL115W	0.781671	0.81385	0	0	0
YJL115W_evolved3	YJL115W	0.781671	0.86704	0	0	0
YJL115W_evolved4	YJL115W	0.781671	0.838631	0	0	0
YJL124C_evolved1	YJL124C	0.875291	0.926996	0	0	0
YJL124C_evolved2	YJL124C	0.875291	0.948728	0	0	0
YJL124C_evolved3	YJL124C	0.875291	0.952004	0	0	0
YJL180C_evolved1	YJL180C	0.538613	0.836047	1	0	0
YJL180C_evolved2	YJL180C	0.538613	0.663544	1	1	0
YJL180C_evolved3	YJL180C	0.538613	1.40936	1	1	0
YJL180C_evolved4	YJL180C	0.538613	0.702633	1	1	0
YJL188C_evolved1	YJL188C	0.586535	0.589726	0	0	0
YJL188C_evolved2	YJL188C	0.586535	0.592044	0	0	0
YJL188C_evolved3	YJL188C	0.586535	0.594488	0	0	0
YJL188C_evolved4	YJL188C	0.586535	0.649902	0	0	0
YJL189W_evolved1	YJL189W	0.744785	0.646233	0	0	0
YJL189W_evolved2	YJL189W	0.744785	0.58611	0	0	0
YJL189W_evolved3	YJL189W	0.744785	0.606863	0	0	0
YJL189W_evolved4	YJL189W	0.744785	0.600297	0	0	0
YJR032W_evolved1	YJR032W	0.864527	0.87663	0	0	0
YJR032W_evolved2	YJR032W	0.864527	0.892257	0	0	0
YJR032W_evolved3	YJR032W	0.864527	0.895439	0	0	0
YJR032W_evolved4	YJR032W	0.864527	0.947952	0	0	0
YJR090C_evolved1	YJR090C	0.738694	1.05339	1	0	0
YJR118C_evolved1	YJR118C	0.848572	0.921249	0	0	0
YJR118C_evolved2	YJR118C	0.848572	0.973437	1	0	0
YJR118C_evolved3	YJR118C	0.848572	1.01527	1	0	0
YJR122W_evolved1	YJR122W	0.814407	0.928702	1	0	0
YJR122W_evolved2	YJR122W	0.814407	0.821005	0	0	0
YJR122W_evolved3	YJR122W	0.814407	1.11409	1	0	0
YJR122W_evolved4	YJR122W	0.814407	0.923815	0	0	0
YJR144W_evolved1	YJR144W	0.863073	1.19571	1	0	0
YJR144W_evolved2	YJR144W	0.863073	0.893666	0	0	0
YJR144W_evolved3	YJR144W	0.863073	0.91313	0	0	0
YJR144W_evolved4	YJR144W	0.863073	0.947807	0	0	0
YJR145C_evolved1	YJR145C	0.845109	1.35521	1	0	0
YJR145C_evolved2	YJR145C	0.845109	1.20362	1	0	0
YJR145C_evolved3	YJR145C	0.845109	1.13708	1	0	0
YJR145C_evolved4	YJR145C	0.845109	1.42006	1	0	0
YKL009W_evolved1	YKL009W	0.846759	0.951992	0	0	0
YKL009W_evolved2	YKL009W	0.846759	0.866071	0	0	0
YKL009W_evolved3	YKL009W	0.846759	0.859271	0	0	0
YKL009W_evolved4	YKL009W	0.846759	0.92805	0	0	0
YKL016C_evolved1	YKL016C	0.748658	0.762723	0	0	0
YKL016C_evolved2	YKL016C	0.748658	0.801459	0	0	0
YKL016C_evolved3	YKL016C	0.748658	0.743574	0	0	0
YKL016C_evolved4	YKL016C	0.748658	0.698895	0	0	0
YKL057C_evolved1	YKL057C	0.712482	0.798457	0	0	0
YKL057C_evolved2	YKL057C	0.712482	0.878282	1	0	0
YKL057C_evolved3	YKL057C	0.712482	0.834488	1	0	0
YKL057C_evolved4	YKL057C	0.712482	0.851792	1	0	0
YKL119C_evolved1	YKL119C	0.726909	0.872115	1	0	0
YKL204W_evolved1	YKL204W	0.792798	0.862251	0	0	0
YKL204W_evolved2	YKL204W	0.792798	0.863759	0	0	0
YKL204W_evolved3	YKL204W	0.792798	0.879455	0	0	0
YKL204W_evolved4	YKL204W	0.792798	1.00515	1	0	0
YKL212W_evolved1	YKL212W	0.727416	0.874761	1	0	0
YKL212W_evolved2	YKL212W	0.727416	0.863783	1	0	0
YKL212W_evolved3	YKL212W	0.727416	1.15645	1	0	0
YKR074W_evolved1	YKR074W	0.843455	0.959384	1	0	0
YKR074W_evolved2	YKR074W	0.843455	0.906877	0	0	0
YKR074W_evolved3	YKR074W	0.843455	0.916738	0	0	0
YLL002W_evolved1	YLL002W	0.729237	0.896026	1	0	0
YLL002W_evolved2	YLL002W	0.729237	0.79309	0	0	0
YLL002W_evolved3	YLL002W	0.729237	0.822597	0	0	0
YLL002W_evolved4	YLL002W	0.729237	0.806409	0	0	0
YLL027W_evolved1	YLL027W	0.749368	0.812371	0	0	0
YLL027W_evolved2	YLL027W	0.749368	0.819756	0	0	0
YLR027C_evolved1	YLR027C	0.869782	0.976162	0	0	0
YLR027C_evolved2	YLR027C	0.869782	0.965071	0	0	0
YLR027C_evolved3	YLR027C	0.869782	0.976227	0	0	0
YLR027C_evolved4	YLR027C	0.869782	0.924825	0	0	0
YLR062C_evolved1	YLR062C	0.802072	0.889831	0	0	0
YLR062C_evolved2	YLR062C	0.802072	0.845873	0	0	0
YLR062C_evolved3	YLR062C	0.802072	0.90631	0	0	0
YLR074C_evolved2	YLR074C	0.716238	0.930355	1	1	1
YLR074C_evolved4	YLR074C	0.716238	0.927832	1	1	0
YLR074C_evolved3	YLR074C	0.716238	0.880871	1	1	0
YLR074C_evolved1	YLR074C	0.716238	0.966572	1	1	0
YLR079W_evolved1	YLR079W	0.790652	0.932512	1	0	0
YLR079W_evolved2	YLR079W	0.790652	0.985566	1	0	0
YLR079W_evolved3	YLR079W	0.790652	0.886644	0	0	0
YLR079W_evolved4	YLR079W	0.790652	0.911134	1	0	0
YLR226W_evolved1	YLR226W	0.597879	1.32623	1	0	0
YLR226W_evolved2	YLR226W	0.597879	1.42511	1	0	0
YLR239C_evolved1	YLR239C	0.828033	1.15707	1	0	0
YLR239C_evolved2	YLR239C	0.828033	1.16152	1	0	0
YLR239C_evolved3	YLR239C	0.828033	1.64188	1	0	0
YLR239C_evolved4	YLR239C	0.828033	1.96229	1	0	0
YLR312W-A_evolved1	YLR312W-A	0.896814	0.932165	0	0	0
YLR312W-A_evolved2	YLR312W-A	0.896814	0.934543	0	0	0
YLR312W-A_evolved3	YLR312W-A	0.896814	1.01102	0	0	0
YLR312W-A_evolved4	YLR312W-A	0.896814	0.926225	0	0	0
YLR320W_evolved1	YLR320W	0.679527	0.908812	1	0	0
YLR320W_evolved2	YLR320W	0.679527	0.86079	0	0	0
YLR320W_evolved3	YLR320W	0.679527	0.878231	1	0	0
YLR320W_evolved4	YLR320W	0.679527	0.756216	0	0	0
YLR322W_evolved1	YLR322W	0.754005	0.98902	1	0	0
YLR322W_evolved2	YLR322W	0.754005	0.970679	1	0	0
YLR322W_evolved3	YLR322W	0.754005	1.01918	1	0	0
YLR322W_evolved4	YLR322W	0.754005	0.873503	1	0	0
YLR357W_evolved3	YLR357W	0.767572	1.00339	1	0	0
YLR357W_evolved2	YLR357W	0.767572	1.03482	1	1	0
YLR357W_evolved1	YLR357W	0.767572	1.05469	1	1	1
YLR357W_evolved4	YLR357W	0.767572	1.03428	1	1	0
YLR372W_evolved1	YLR372W	0.779673	0.943759	1	0	0
YLR372W_evolved2	YLR372W	0.779673	0.902427	1	0	0
YLR372W_evolved3	YLR372W	0.779673	0.917598	1	0	0
YLR372W_evolved4	YLR372W	0.779673	0.898175	1	0	0
YLR373C_evolved1	YLR373C	0.857705	0.926303	0	0	0
YLR373C_evolved2	YLR373C	0.857705	1.05318	1	0	0
YLR373C_evolved3	YLR373C	0.857705	0.932358	0	0	0
YLR384C_evolved1	YLR384C	0.87217	0.885058	0	0	0
YLR384C_evolved2	YLR384C	0.87217	0.890984	0	0	0
YLR384C_evolved3	YLR384C	0.87217	0.881971	0	0	0
YLR384C_evolved4	YLR384C	0.87217	0.905048	0	0	0
YLR396C_evolved1	YLR396C	0.821261	0.881265	0	0	0
YLR396C_evolved2	YLR396C	0.821261	0.873632	0	0	0
YLR403W_evolved1	YLR403W	0.57106	0.616242	0	0	0
YLR403W_evolved2	YLR403W	0.57106	0.606588	0	0	0
YLR403W_evolved3	YLR403W	0.57106	1.61002	1	0	0
YLR418C_evolved1	YLR418C	0.711283	0.926577	0	0	0
YLR418C_evolved2	YLR418C	0.711283	0.881878	0	0	0
YLR418C_evolved3	YLR418C	0.711283	0.879503	0	0	0
YLR418C_evolved4	YLR418C	0.711283	1.3132	1	0	0
YLR448W_evolved1	YLR448W	0.846569	1.06005	1	1	0
YLR448W_evolved4	YLR448W	0.846569	1.05594	1	0	0
YLR448W_evolved3	YLR448W	0.846569	1.20318	1	1	0
YLR448W_evolved2	YLR448W	0.846569	1.1749	1	1	0
YML024W_evolved1	YML024W	0.896431	0.696477	0	0	0
YML024W_evolved2	YML024W	0.896431	0.685565	0	0	0
YML024W_evolved3	YML024W	0.896431	0.841143	0	0	0
YML024W_evolved4	YML024W	0.896431	0.828949	0	0	0
YML032C_evolved1	YML032C	0.784699	0.913502	1	0	0
YML032C_evolved2	YML032C	0.784699	0.899985	1	0	0
YML032C_evolved3	YML032C	0.784699	0.880322	0	0	0
YML112W_evolved1	YML112W	0.798691	0.859453	0	0	0
YML112W_evolved2	YML112W	0.798691	0.880039	0	0	0
YML112W_evolved3	YML112W	0.798691	0.907812	1	0	0
YML112W_evolved4	YML112W	0.798691	0.943166	1	0	0
YMR077C_evolved1	YMR077C	0.871965	0.923063	0	0	0
YMR077C_evolved2	YMR077C	0.871965	0.966776	0	0	0
YMR077C_evolved3	YMR077C	0.871965	0.968962	0	0	0
YMR077C_evolved4	YMR077C	0.871965	0.919065	0	0	0
YMR089C_evolved1	YMR089C	0.729247	0.938943	1	0	0
YMR089C_evolved2	YMR089C	0.729247	0.850674	1	0	0
YMR089C_evolved3	YMR089C	0.729247	0.860232	1	0	0
YMR089C_evolved4	YMR089C	0.729247	0.818637	0	0	0
YMR224C_evolved1	YMR224C	0.749791	0.915827	1	0	0
YMR224C_evolved2	YMR224C	0.749791	0.836099	0	0	0
YMR224C_evolved3	YMR224C	0.749791	0.857368	1	0	0
YMR224C_evolved4	YMR224C	0.749791	0.941021	1	0	0
YNL005C_evolved1	YNL005C	0.758076	0.99238	1	0	0
YNL005C_evolved2	YNL005C	0.758076	0.996981	1	0	0
YNL005C_evolved3	YNL005C	0.758076	0.863347	1	0	0
YNL005C_evolved4	YNL005C	0.758076	0.848442	0	0	0
YNL025C_evolved1	YNL025C	0.896616	0.970896	0	0	0
YNL025C_evolved2	YNL025C	0.896616	1.00244	0	0	0
YNL025C_evolved3	YNL025C	0.896616	1.0289	0	0	0
YNL025C_evolved4	YNL025C	0.896616	1.01943	1	0	0
YNL059C_evolved1	YNL059C	0.878275	0.859717	0	0	0
YNL059C_evolved2	YNL059C	0.878275	0.909762	0	0	0
YNL059C_evolved3	YNL059C	0.878275	1.0517	0	0	0
YNL059C_evolved4	YNL059C	0.878275	1.38769	1	0	0
YNL069C_evolved1	YNL069C	0.85195	1.08126	1	0	0
YNL069C_evolved2	YNL069C	0.85195	0.887515	0	0	0
YNL081C_evolved1	YNL081C	0.862165	0.86783	0	0	0
YNL215W_evolved1	YNL215W	0.882517	1.05264	1	0	0
YNL215W_evolved2	YNL215W	0.882517	0.962461	0	0	0
YNL215W_evolved3	YNL215W	0.882517	0.989779	0	0	0
YNL215W_evolved4	YNL215W	0.882517	1.13094	1	0	0
YNL225C_evolved1	YNL225C	0.562865	1.02042	1	0	0
YNL225C_evolved2	YNL225C	0.562865	0.630986	0	0	0
YNL248C_evolved1	YNL248C	0.848117	0.904511	0	0	0
YNL248C_evolved2	YNL248C	0.848117	0.880203	0	0	0
YNL248C_evolved3	YNL248C	0.848117	0.871992	0	0	0
YNL248C_evolved4	YNL248C	0.848117	0.877799	0	0	0
YNL250W_evolved1	YNL250W	0.791849	0.892333	0	0	0
YNL250W_evolved2	YNL250W	0.791849	0.854546	0	0	0
YNL250W_evolved3	YNL250W	0.791849	0.884291	0	0	0
YNL250W_evolved4	YNL250W	0.791849	0.860654	0	0	0
YNL252C_evolved1	YNL252C	0.802312	0.880002	0	0	0
YNL252C_evolved2	YNL252C	0.802312	0.852946	0	0	0
YNL252C_evolved3	YNL252C	0.802312	0.89272	0	0	0
YNL252C_evolved4	YNL252C	0.802312	0.898754	0	0	0
YNL284C_evolved1	YNL284C	0.748135	0.880241	1	0	0
YNL284C_evolved2	YNL284C	0.748135	0.850111	1	0	0
YNL284C_evolved3	YNL284C	0.748135	0.889959	0	0	0
YNL315C_evolved1	YNL315C	0.615881	0.837942	1	0	0
YNL315C_evolved2	YNL315C	0.615881	1.44939	1	0	0
YNL315C_evolved3	YNL315C	0.615881	0.661191	0	0	0
YNR036C_evolved1	YNR036C	0.889088	1.70928	1	0	0
YNR036C_evolved2	YNR036C	0.889088	0.926864	0	0	0
YNR036C_evolved3	YNR036C	0.889088	1.31277	1	0	0
YNR036C_evolved4	YNR036C	0.889088	0.953035	0	0	0
YNR052C_evolved2	YNR052C	0.722533	1.51591	1	0	0
YNR052C_evolved3	YNR052C	0.722533	0.778138	0	1	0
YNR052C_evolved1	YNR052C	0.722533	0.945807	1	1	1
YNR052C_evolved4	YNR052C	0.722533	0.820225	0	0	0
YOL004W_evolved1	YOL004W	0.826757	1.00575	1	0	0
YOL004W_evolved2	YOL004W	0.826757	0.927586	0	0	0
YOL004W_evolved3	YOL004W	0.826757	1.07256	1	0	0
YOL004W_evolved4	YOL004W	0.826757	1.04091	1	0	0
YOL006C_evolved1	YOL006C	0.841084	0.905908	0	0	0
YOL006C_evolved2	YOL006C	0.841084	0.876958	0	0	0
YOL006C_evolved3	YOL006C	0.841084	0.942437	0	0	0
YOL023W_evolved2	YOL023W	0.612641	1.43341	1	1	0
YOL023W_evolved1	YOL023W	0.612641	1.20506	1	1	1
YOL023W_evolved3	YOL023W	0.612641	1.50732	1	1	0
YOL023W_evolved4	YOL023W	0.612641	1.64201	1	0	0
YOL076W_evolved1	YOL076W	0.662559	0.882481	1	0	0
YOL076W_evolved2	YOL076W	0.662559	0.733199	0	0	0
YOL076W_evolved3	YOL076W	0.662559	0.770269	1	0	0
YOL096C_evolved1	YOL096C	0.884707	1.36702	1	0	0
YOL096C_evolved2	YOL096C	0.884707	0.94786	0	0	0
YOL096C_evolved3	YOL096C	0.884707	0.942005	0	0	0
YOR026W_evolved1	YOR026W	0.817434	1.04211	0	1	0
YOR026W_evolved2	YOR026W	0.817434	1.03916	1	1	0
YOR026W_evolved3	YOR026W	0.817434	1.38908	1	1	0
YOR026W_evolved4	YOR026W	0.817434	1.0084	0	1	0
YOR035C_evolved1	YOR035C	0.869107	0.96585	0	0	0
YOR035C_evolved2	YOR035C	0.869107	0.875058	0	0	0
YOR035C_evolved3	YOR035C	0.869107	1.1028	0	0	0
YOR035C_evolved4	YOR035C	0.869107	0.924912	0	0	0
YOR078W_evolved1	YOR078W	0.84024	0.835606	0	0	0
YOR078W_evolved2	YOR078W	0.84024	0.852401	0	0	0
YOR078W_evolved3	YOR078W	0.84024	0.864135	0	0	0
YOR078W_evolved4	YOR078W	0.84024	0.788042	0	0	0
YOR096W_evolved1	YOR096W	0.725412	0.796717	0	0	0
YOR096W_evolved2	YOR096W	0.725412	0.928005	1	0	0
YOR096W_evolved3	YOR096W	0.725412	0.776404	0	0	0
YOR158W_evolved1	YOR158W	0.870398	0.891706	0	0	0
YOR158W_evolved2	YOR158W	0.870398	0.908569	0	0	0
YOR182C_evolved1	YOR182C	0.883695	1.11122	1	0	0
YOR182C_evolved2	YOR182C	0.883695	1.06831	1	0	0
YOR182C_evolved3	YOR182C	0.883695	1.10233	1	0	0
YOR182C_evolved4	YOR182C	0.883695	1.01954	1	0	0
YOR183W_evolved1	YOR183W	0.880865	1.05242	1	0	0
YOR183W_evolved2	YOR183W	0.880865	0.986336	0	0	0
YOR183W_evolved3	YOR183W	0.880865	1.04813	1	0	0
YOR183W_evolved4	YOR183W	0.880865	1.03225	1	0	0
YOR211C_evolved1	YOR211C	0.766464	0.798767	0	0	0
YOR211C_evolved2	YOR211C	0.766464	0.815312	0	0	0
YOR241W_evolved1	YOR241W	0.870776	1.04806	1	0	0
YOR241W_evolved2	YOR241W	0.870776	0.908164	0	0	0
YOR241W_evolved3	YOR241W	0.870776	0.926088	0	0	0
YOR305W_evolved1	YOR305W	0.878267	0.915587	0	0	0
YOR305W_evolved2	YOR305W	0.878267	0.920662	0	0	0
YOR305W_evolved3	YOR305W	0.878267	0.872602	0	0	0
YPL024W_evolved1	YPL024W	0.832532	0.951375	0	0	0
YPL024W_evolved2	YPL024W	0.832532	0.998742	1	0	0
YPL024W_evolved3	YPL024W	0.832532	0.943213	0	0	0
YPL024W_evolved4	YPL024W	0.832532	1.00359	0	0	0
YPL042C_evolved1	YPL042C	0.876813	0.978365	0	0	0
YPL042C_evolved2	YPL042C	0.876813	0.964409	0	0	0
YPL042C_evolved3	YPL042C	0.876813	0.99775	1	0	0
YPL042C_evolved4	YPL042C	0.876813	0.98351	0	0	0
YPL045W_evolved1	YPL045W	0.741481	1.22155	1	0	0
YPL045W_evolved2	YPL045W	0.741481	1.49114	1	0	0
YPL078C_evolved1	YPL078C	0.859134	0.928678	0	0	0
YPL078C_evolved2	YPL078C	0.859134	0.936954	0	0	0
YPL086C_evolved1	YPL086C	0.829123	0.868286	0	0	0
YPL086C_evolved2	YPL086C	0.829123	1.10899	1	0	0
YPL086C_evolved3	YPL086C	0.829123	0.918797	0	0	0
YPL097W_evolved1	YPL097W	0.875838	0.951838	0	0	0
YPL097W_evolved2	YPL097W	0.875838	0.862261	0	0	0
YPL101W_evolved1	YPL101W	0.856642	0.902789	0	0	0
YPL101W_evolved2	YPL101W	0.856642	0.898006	0	0	0
YPL101W_evolved3	YPL101W	0.856642	0.850906	0	0	0
YPL101W_evolved4	YPL101W	0.856642	0.872186	0	0	0
YPL106C_evolved1	YPL106C	0.741961	0.779528	0	0	0
YPL106C_evolved2	YPL106C	0.741961	0.693898	0	0	0
YPL106C_evolved3	YPL106C	0.741961	0.904817	1	0	0
YPL161C_evolved1	YPL161C	0.819871	0.964106	1	0	0
YPL161C_evolved2	YPL161C	0.819871	1.00058	1	0	0
YPL161C_evolved3	YPL161C	0.819871	0.949158	1	0	0
YPL180W_evolved1	YPL180W	0.871692	0.981911	0	0	0
YPL180W_evolved2	YPL180W	0.871692	0.97007	0	0	0
YPL180W_evolved3	YPL180W	0.871692	1.00202	1	0	0
YPL180W_evolved4	YPL180W	0.871692	0.986221	0	0	0
YPL271W_evolved1	YPL271W	0.379177	0.831638	1	0	0
YPL271W_evolved2	YPL271W	0.379177	0.767863	1	0	0
YPR036W_evolved1	YPR036W	0.853444	0.929525	0	0	0
YPR036W_evolved2	YPR036W	0.853444	0.931909	0	0	0
YPR043W_evolved4	YPR043W	0.585903	0.910638	1	0	0
YPR043W_evolved2	YPR043W	0.585903	0.828306	1	0	0
YPR043W_evolved3	YPR043W	0.585903	0.839719	1	0	0
YPR043W_evolved1	YPR043W	0.585903	1.18346	1	0	1
YPR067W_evolved1	YPR067W	0.778899	0.816788	0	0	0
YPR067W_evolved2	YPR067W	0.778899	0.823742	0	0	0
YPR067W_evolved3	YPR067W	0.778899	0.801371	0	0	0
YPR067W_evolved4	YPR067W	0.778899	0.843616	0	0	0
YPR070W_evolved1	YPR070W	0.896128	1.08856	1	0	0
YPR070W_evolved2	YPR070W	0.896128	1.0099	0	0	0
YPR070W_evolved3	YPR070W	0.896128	1.07105	1	0	0
YPR070W_evolved4	YPR070W	0.896128	1.04133	1	0	0
YPR100W_evolved1	YPR100W	0.848509	0.903183	0	0	0
YPR100W_evolved2	YPR100W	0.848509	1.38953	1	0	0
YPR100W_evolved3	YPR100W	0.848509	0.952369	0	0	0
YPR101W_evolved1	YPR101W	0.603994	0.894272	1	0	0
YPR101W_evolved2	YPR101W	0.603994	0.902929	1	0	0
YPR101W_evolved3	YPR101W	0.603994	0.901731	1	0	0
YPR134W_evolved1	YPR134W	0.858725	1.03413	1	0	0
YPR134W_evolved2	YPR134W	0.858725	0.987178	1	0	0
YPR134W_evolved3	YPR134W	0.858725	1.32808	1	0	0
YPR134W_evolved4	YPR134W	0.858725	1.04413	1	0	0
YPR135W_evolved1	YPR135W	0.792631	0.767101	0	0	0
YPR135W_evolved2	YPR135W	0.792631	0.783826	0	0	0
YPR135W_evolved3	YPR135W	0.792631	0.84875	0	0	0

## Sheet: Phenotypic_profiles-lines
		Acetic acid				Benomyl				Caffein				Cycloheximide				Ethanol				Ethanol + glycerol				Glucose				Glucose + ethanol				Glycerol				Hygromycin B				Potassium acetate				Lactate
Name of evolutionary line	systematic gene name	colony size at start	colony size at end	colony size at start compared to WT	colony size at end compared to start	colony size at start	colony size at end	colony size at start compared to WT	colony size at end compared to start	colony size at start	colony size at end	colony size at start compared to WT	colony size at end compared to start	colony size at start	colony size at end	colony size at start compared to WT	colony size at end compared to start	colony size at start	colony size at end	colony size at start compared to WT	colony size at end compared to start	colony size at start	colony size at end	colony size at start compared to WT	colony size at end compared to start	colony size at start	colony size at end	colony size at start compared to WT	colony size at end compared to start	colony size at start	colony size at end	colony size at start compared to WT	colony size at end compared to start	colony size at start	colony size at end	colony size at start compared to WT	colony size at end compared to start	colony size at start	colony size at end	colony size at start compared to WT	colony size at end compared to start	colony size at start	colony size at end	colony size at start compared to WT	colony size at end compared to start	colony size at start	colony size at end	colony size at start compared to WT	colony size at end compared to start
YBL099W_evolved1	YBL099W	0.359561	0.498816	-1	0	0.499962	0.894316	-1	1	0.760928	0.482106	-1	-1	0.620296	0.528657	-1	0	NA	NA	NA	NA	NA	NA	NA	NA	0.635321	1.05473	-1	1	0.570047	1.04376	-1	1	0.0334308	1.09618	0	0	0.698511	0.720003	-1	0	NA	NA	NA	NA	0.0343016	1.05883	-1	0
YBL099W_evolved2	YBL099W	0.359561	0.342203	-1	0	0.499962	0.466673	-1	0	0.760928	0.787194	-1	0	0.620296	0.753243	-1	0	NA	NA	NA	NA	NA	NA	NA	NA	0.635321	0.539845	-1	0	0.570047	0.544021	-1	0	0.0334308	NA	0	NA	0.698511	0.649242	-1	0	NA	NA	NA	NA	0.0343016	NA	-1	NA
YBL099W_evolved3	YBL099W	0.359561	0.410908	-1	0	0.499962	0.538923	-1	0	0.760928	0.885076	-1	0	0.620296	0.71324	-1	0	NA	NA	NA	NA	NA	NA	NA	NA	0.635321	0.650412	-1	0	0.570047	0.67783	-1	1	0.0334308	0.0363326	0	0	0.698511	0.83202	-1	1	NA	NA	NA	NA	0.0343016	NA	-1	NA
YBR026C_evolved2	YBR026C	0.184977	0.933135	-1	1	0.649578	1.08532	-1	1	0.684232	0.844659	-1	0	0.719022	0.947048	-1	1	0.567596	1.04233	-1	1	0.453749	0.963079	-1	1	0.736154	1.02698	-1	1	0.712577	0.673985	-1	0	0.126249	0.776113	-1	1	0.786013	0.787033	-1	0	0.0985928	0.825557	-1	1	0.0770593	0.919395	-1	1
YBR026C_evolved3	YBR026C	0.184977	0.276894	-1	1	0.649578	0.854438	-1	1	0.684232	0.976472	-1	1	0.719022	0.755407	-1	0	0.567596	0.65703	-1	1	0.453749	0.529284	-1	1	0.736154	0.790726	-1	1	0.712577	0.789131	-1	1	0.126249	0.133293	-1	0	0.786013	0.708029	-1	0	0.0985928	0.0717629	-1	0	0.0770593	0.126364	-1	1
YBR026C_evolved4	YBR026C	0.184977	0.42704	-1	1	0.649578	0.797671	-1	1	0.684232	0.651503	-1	0	0.719022	0.679235	-1	0	0.567596	0.402445	-1	-1	0.453749	0.421451	-1	0	0.736154	0.743187	-1	0	0.712577	0.691585	-1	0	0.126249	0.117967	-1	0	0.786013	0.788111	-1	0	0.0985928	0.0744074	-1	0	0.0770593	0.149752	-1	1
YBR106W_evolved1	YBR106W	0.835998	1.06626	-1	0	0.787432	0.661345	-1	0	0.709351	0.103583	-1	-1	0.680927	0.729585	-1	0	0.983083	1.05016	0	1	0.91879	0.917674	-1	0	0.858402	0.997983	-1	1	0.822516	1.09517	-1	1	0.244416	0.370719	-1	0	0.668236	0.772064	-1	0	0.846641	0.810139	-1	0	0.667235	0.976211	-1	1
YBR106W_evolved4	YBR106W	0.835998	0.935069	-1	0	0.787432	0.764569	-1	0	0.709351	0.372437	-1	-1	0.680927	0.868613	-1	1	0.983083	1.16802	0	1	0.91879	1.03047	-1	1	0.858402	0.915497	-1	1	0.822516	1.14669	-1	1	0.244416	0.715462	-1	1	0.668236	0.9168	-1	1	0.846641	1.05293	-1	1	0.667235	0.798691	-1	1
YBR163W_evolved2	YBR163W	0.430006	0.179055	-1	0	0.628499	0.692103	-1	1	0.868012	0.880227	-1	0	0.995717	0.985414	0	0	NA	NA	NA	NA	NA	NA	NA	NA	0.715105	0.660429	-1	0	0.680901	0.653036	-1	0	0.0413089	NA	-1	NA	0.854874	0.90773	-1	0	NA	NA	NA	NA	NA	NA	NA	NA
YBR163W_evolved3	YBR163W	0.430006	0.862056	-1	1	0.628499	1.11332	-1	1	0.868012	0.878759	-1	0	0.995717	0.953794	0	0	NA	NA	NA	NA	NA	NA	NA	NA	0.715105	1.04565	-1	1	0.680901	0.500183	-1	0	0.0413089	0.781794	-1	0	0.854874	0.809027	-1	0	NA	NA	NA	NA	NA	NA	NA	NA
YBR173C_evolved1	YBR173C	0.385153	0.498401	-1	0	0.695959	0.70151	-1	0	0.359431	0.356609	-1	0	0.172483	0.0991134	-1	0	0.815041	0.8671	-1	0	0.754663	0.948906	-1	1	0.757812	0.863245	-1	1	0.385513	0.493128	-1	0	0.489558	0.60943	-1	1	0.150614	0.317905	-1	1	0.67074	0.815692	-1	1	0.608605	0.81902	-1	1
YBR173C_evolved2	YBR173C	0.385153	0.336852	-1	0	0.695959	0.476262	-1	0	0.359431	0.0475693	-1	-1	0.172483	0.724564	-1	0	0.815041	0.716181	-1	0	0.754663	0.927671	-1	1	0.757812	0.864459	-1	1	0.385513	0.381398	-1	0	0.489558	0.56307	-1	1	0.150614	0.14519	-1	0	0.67074	0.895561	-1	1	0.608605	0.813293	-1	1
YBR181C_evolved3	YBR181C	0.947962	0.951395	-1	0	1.01204	1.08508	0	1	0.647399	0.723605	-1	1	0.909925	0.737708	-1	-1	1.02348	1.0385	0	0	0.895369	0.942384	-1	1	0.842285	0.892189	-1	1	1.04509	1.0155	0	0	0.970115	0.947447	0	0	0.789387	0.616715	-1	-1	1.03296	0.958573	0	0	0.984667	1.02643	0	1
YBR189W_evolved3	YBR189W	0.921647	0.785448	-1	0	0.972413	0.615452	0	-1	0.866454	0.614139	-1	-1	0.968619	0.899089	0	0	0.973352	1.00482	0	0	0.839962	0.945398	-1	1	0.801065	0.964519	-1	1	0.847224	1.06704	-1	1	0.760784	0.597837	-1	0	0.840652	0.861953	-1	0	0.66921	0.703661	-1	0	0.891507	0.885905	-1	0
YBR189W_evolved4	YBR189W	0.921647	0.882161	-1	0	0.972413	0.744478	0	0	0.866454	0.701115	-1	0	0.968619	0.904238	0	0	0.973352	1.05835	0	1	0.839962	0.956969	-1	1	0.801065	0.837829	-1	0	0.847224	1.18888	-1	1	0.760784	0.746699	-1	0	0.840652	0.973137	-1	0	0.66921	0.726732	-1	0	0.891507	0.831575	-1	0
YBR200W_evolved1	YBR200W	0.618584	0.987794	-1	1	0.696468	0.998755	-1	1	0.0515377	0.753822	-1	1	0.100145	0.736238	-1	1	0.288087	1.03902	-1	1	0.778481	1.03938	-1	1	0.671738	1.04782	-1	1	0.386764	1.08897	-1	1	0.211524	0.923657	-1	1	0.647582	0.798986	-1	1	0.119477	1.11067	-1	1	0.626705	1.05923	-1	1
YBR200W_evolved2	YBR200W	0.618584	0.881144	-1	1	0.696468	0.371208	-1	-1	0.0515377	0.111701	-1	1	0.100145	0.398878	-1	1	0.288087	0.867648	-1	1	0.778481	0.827444	-1	1	0.671738	0.893968	-1	1	0.386764	0.678042	-1	1	0.211524	0.400302	-1	1	0.647582	0.778422	-1	1	0.119477	0.515094	-1	1	0.626705	0.905771	-1	1
YBR200W_evolved3	YBR200W	0.618584	0.871747	-1	1	0.696468	0.549116	-1	-1	0.0515377	NA	-1	NA	0.100145	0.376314	-1	1	0.288087	1.0232	-1	1	0.778481	1.05184	-1	1	0.671738	0.887505	-1	1	0.386764	0.888911	-1	1	0.211524	0.81489	-1	1	0.647582	0.84204	-1	1	0.119477	0.738765	-1	1	0.626705	0.824522	-1	1
YBR221C_evolved1	YBR221C	0.477186	0.676743	-1	1	0.554087	0.838219	-1	1	0.450054	0.71232	-1	1	0.800375	0.765871	-1	0	0.90812	0.834624	-1	0	0.839998	0.943395	-1	1	0.829419	0.840382	-1	0	0.650673	0.79352	-1	1	0.343285	0.88365	-1	1	0.926116	0.837583	-1	-1	0.984361	1.21367	0	1	0.930838	1.00053	-1	0
YBR221C_evolved2	YBR221C	0.477186	0.267859	-1	0	0.554087	0.735691	-1	1	0.450054	0.91404	-1	1	0.800375	0.862021	-1	0	0.90812	0.961523	-1	1	0.839998	0.869529	-1	1	0.829419	0.835545	-1	0	0.650673	0.81447	-1	1	0.343285	0.69796	-1	1	0.926116	0.855787	-1	-1	0.984361	0.996109	0	0	0.930838	0.891994	-1	0
YBR221C_evolved3	YBR221C	0.477186	0.430451	-1	0	0.554087	0.613062	-1	1	0.450054	0.879618	-1	1	0.800375	0.910668	-1	0	0.90812	0.898924	-1	0	0.839998	0.855653	-1	0	0.829419	0.79192	-1	0	0.650673	0.751064	-1	1	0.343285	0.497646	-1	1	0.926116	0.778785	-1	-1	0.984361	0.913828	0	0	0.930838	0.903027	-1	0
YBR267W_evolved1	YBR267W	0.539072	1.0363	-1	1	0.803171	1.03926	-1	1	0.587591	0.70282	-1	1	0.241359	0.895039	-1	1	0.715342	1.00102	-1	1	0.78359	0.950566	-1	1	0.757817	1.02531	-1	1	0.697783	1.06199	-1	1	0.486717	0.958125	-1	1	0.887839	0.75323	-1	-1	0.435441	0.97995	-1	1	0.838824	1.0283	-1	1
YBR267W_evolved3	YBR267W	0.539072	0.832711	-1	1	0.803171	0.97325	-1	1	0.587591	0.955214	-1	1	0.241359	0.489758	-1	1	0.715342	0.944273	-1	1	0.78359	0.927365	-1	1	0.757817	0.849962	-1	1	0.697783	0.985851	-1	1	0.486717	1.12213	-1	1	0.887839	0.84898	-1	0	0.435441	0.892504	-1	1	0.838824	0.90716	-1	1
YBR267W_evolved4	YBR267W	0.539072	0.793844	-1	1	0.803171	0.806211	-1	0	0.587591	0.71818	-1	1	0.241359	0.31905	-1	0	0.715342	0.943069	-1	1	0.78359	0.909665	-1	1	0.757817	0.828725	-1	0	0.697783	0.837507	-1	1	0.486717	1.06309	-1	1	0.887839	0.768306	-1	-1	0.435441	0.941291	-1	1	0.838824	0.968376	-1	1
YBR282W_evolved1	YBR282W	0.39118	0.442029	-1	0	0.62124	0.573326	-1	0	0.946701	1.05029	0	0	1.04216	1.0109	0	0	0.863783	NA	-1	NA	0.857185	NA	-1	NA	0.69981	0.715254	-1	0	0.650856	0.695911	-1	0	0.0408513	0.0398241	-1	0	0.877002	0.888768	-1	0	0.717725	NA	-1	NA	0.865065	NA	-1	NA
YBR282W_evolved3	YBR282W	0.39118	0.409608	-1	0	0.62124	0.592513	-1	0	0.946701	0.947853	0	0	1.04216	1.03722	0	0	0.863783	NA	-1	NA	0.857185	NA	-1	NA	0.69981	0.697585	-1	0	0.650856	0.682999	-1	0	0.0408513	NA	-1	NA	0.877002	0.919395	-1	0	0.717725	NA	-1	NA	0.865065	NA	-1	NA
YBR282W_evolved4	YBR282W	0.39118	0.374414	-1	0	0.62124	0.539407	-1	-1	0.946701	0.925984	0	0	1.04216	0.969934	0	0	0.863783	NA	-1	NA	0.857185	NA	-1	NA	0.69981	0.535588	-1	0	0.650856	0.570168	-1	0	0.0408513	0.0348614	-1	0	0.877002	0.90528	-1	0	0.717725	NA	-1	NA	0.865065	NA	-1	NA
YCR024C_evolved1	YCR024C	0.384524	0.451782	-1	1	0.564281	0.598689	-1	0	1.02313	1.34418	0	1	0.823994	0.951004	-1	0	NA	NA	NA	NA	NA	NA	NA	NA	0.640658	0.681106	-1	1	0.622466	0.684135	-1	1	0.0349427	0.0338444	-1	0	0.757404	0.85954	-1	0	NA	NA	NA	NA	0.0326409	NA	-1	NA
YCR024C_evolved2	YCR024C	0.384524	0.559931	-1	1	0.564281	0.610098	-1	1	1.02313	0.802367	0	-1	0.823994	0.955781	-1	0	NA	NA	NA	NA	NA	NA	NA	NA	0.640658	0.922159	-1	1	0.622466	0.955175	-1	1	0.0349427	0.567884	-1	1	0.757404	0.81301	-1	0	NA	NA	NA	NA	0.0326409	0.890973	-1	0
YCR024C_evolved3	YCR024C	0.384524	0.326223	-1	0	0.564281	0.575796	-1	0	1.02313	1.18273	0	0	0.823994	0.759146	-1	0	NA	NA	NA	NA	NA	NA	NA	NA	0.640658	0.641664	-1	0	0.622466	0.641856	-1	0	0.0349427	0.0366512	-1	0	0.757404	0.753401	-1	0	NA	NA	NA	NA	0.0326409	NA	-1	NA
YCR028C_evolved1	YCR028C	0.398371	0.347868	-1	0	0.665584	0.788062	-1	1	0.348966	0.277316	-1	-1	0.303543	0.641552	-1	1	0.958792	0.609844	-1	-1	0.827476	0.635273	-1	-1	0.868161	0.873206	-1	0	0.77105	0.747266	-1	0	0.954739	0.517215	0	0	0.693103	0.662487	-1	0	1.03606	0.776229	0	0	0.770354	0.776434	-1	0
YCR028C_evolved3	YCR028C	0.398371	0.323933	-1	0	0.665584	0.82738	-1	1	0.348966	0.563894	-1	1	0.303543	0.500649	-1	1	0.958792	0.905647	-1	-1	0.827476	0.802098	-1	0	0.868161	0.890712	-1	0	0.77105	0.789256	-1	0	0.954739	0.781438	0	0	0.693103	0.643055	-1	0	1.03606	0.975029	0	0	0.770354	0.765067	-1	0
YCR071C_evolved1	YCR071C	0.415719	0.992264	-1	1	0.642237	0.97389	-1	1	0.872432	0.858246	-1	0	0.940551	0.921593	-1	0	NA	NA	NA	NA	NA	NA	NA	NA	0.684545	1.04097	-1	1	0.635889	0.948269	-1	1	0.0395868	1.01965	-1	1	0.796012	0.904682	-1	0	NA	NA	NA	NA	NA	NA	NA	NA
YCR094W_evolved4	YCR094W	0.664506	0.783661	-1	1	1.00308	0.9951	0	0	1.04058	0.815554	0	-1	1.08432	0.929199	1	-1	0.873213	1.01999	-1	1	0.830367	0.99737	-1	1	0.942746	0.983342	-1	1	0.881759	1.0855	-1	1	0.452567	1.0768	-1	1	0.913586	0.818647	-1	-1	0.459162	1.06778	-1	1	0.832734	0.961351	-1	1
YDL006W_evolved1	YDL006W	0.472553	0.547803	-1	0	0.784699	0.822298	-1	1	0.153388	0.0413374	-1	-1	0.0989137	0.163428	-1	0	0.877575	0.99182	-1	1	0.903226	1.01617	-1	1	0.880998	0.933647	-1	1	0.815509	0.865396	-1	0	0.749642	0.927664	-1	1	0.47902	0.583664	-1	1	0.818666	0.740892	-1	0	0.899281	0.922783	-1	1
YDL006W_evolved2	YDL006W	0.472553	0.44085	-1	0	0.784699	1.27795	-1	1	0.153388	0.065012	-1	-1	0.0989137	0.055227	-1	0	0.877575	0.991881	-1	1	0.903226	0.987643	-1	1	0.880998	0.962898	-1	1	0.815509	1.05863	-1	1	0.749642	0.73034	-1	0	0.47902	0.773575	-1	1	0.818666	0.745516	-1	0	0.899281	0.923642	-1	0
YDL047W_evolved2	YDL047W	0.0476725	0.273367	-1	1	0.74777	0.842439	-1	1	0.85202	1.01036	-1	0	0.138517	0.306584	-1	1	0.672214	0.792057	-1	1	0.660139	0.74971	-1	1	0.702006	0.751741	-1	1	0.512648	0.507691	-1	0	0.446242	0.608881	-1	1	0.608205	0.623238	-1	0	0.833158	0.917338	-1	0	0.4853	0.65394	-1	0
YDL047W_evolved3	YDL047W	0.0476725	NA	-1	NA	0.74777	NA	-1	NA	0.85202	NA	-1	NA	0.138517	NA	-1	NA	0.672214	NA	-1	NA	0.660139	NA	-1	NA	0.702006	NA	-1	NA	0.512648	NA	-1	NA	0.446242	NA	-1	NA	0.608205	NA	-1	NA	0.833158	NA	-1	NA	0.4853	1.03932	-1	0
YDL082W_evolved1	YDL082W	0.879294	0.962883	-1	0	0.915606	1.18323	-1	1	0.842062	0.067603	-1	-1	1.02037	0.414851	0	-1	1.00964	1.11339	0	1	0.952482	1.04338	0	1	0.871145	0.996456	-1	1	0.857605	0.98253	-1	0	0.970451	1.02655	0	0	0.747171	0.638432	-1	-1	0.986853	0.984005	0	0	0.923198	1.06275	-1	1
YDL082W_evolved2	YDL082W	0.879294	0.836946	-1	0	0.915606	1.14026	-1	1	0.842062	0.550798	-1	-1	1.02037	0.827461	0	-1	1.00964	1.16117	0	1	0.952482	0.976451	0	0	0.871145	1.0455	-1	1	0.857605	0.946301	-1	0	0.970451	0.923081	0	0	0.747171	0.686835	-1	0	0.986853	0.94033	0	0	0.923198	1.06011	-1	1
YDL115C_evolved1	YDL115C	0.349441	0.236198	-1	0	1.09071	1.11691	1	0	0.662905	0.556262	-1	0	1.08291	0.122799	0	0	0.832839	0.88858	-1	1	0.803951	0.908454	-1	1	0.794017	0.850924	-1	0	0.7966	0.786359	-1	0	0.471269	0.849819	-1	1	0.688581	0.79645	-1	0	0.468478	0.893097	-1	1	0.748259	0.817927	-1	1
YDL115C_evolved2	YDL115C	0.349441	0.24831	-1	0	1.09071	1.1366	1	0	0.662905	0.643995	-1	0	1.08291	0.632602	0	0	0.832839	0.829897	-1	0	0.803951	0.802043	-1	0	0.794017	0.787589	-1	0	0.7966	0.722703	-1	0	0.471269	0.668495	-1	1	0.688581	0.580803	-1	0	0.468478	0.497091	-1	0	0.748259	0.835808	-1	1
YDL115C_evolved3	YDL115C	0.349441	0.275495	-1	0	1.09071	1.17064	1	0	0.662905	0.543883	-1	0	1.08291	NA	0	NA	0.832839	0.943604	-1	1	0.803951	0.909757	-1	1	0.794017	0.832169	-1	1	0.7966	0.751819	-1	0	0.471269	0.934945	-1	1	0.688581	0.492756	-1	-1	0.468478	0.992058	-1	1	0.748259	0.930896	-1	1
YDL115C_evolved4	YDL115C	0.349441	0.477773	-1	1	1.09071	1.15806	1	0	0.662905	0.618158	-1	0	1.08291	0.0554489	0	0	0.832839	0.885642	-1	1	0.803951	0.870233	-1	1	0.794017	0.814129	-1	0	0.7966	0.662584	-1	0	0.471269	0.689865	-1	1	0.688581	0.679682	-1	0	0.468478	0.674691	-1	1	0.748259	0.804784	-1	1
YDL130W_evolved1	YDL130W	0.929031	1.07235	-1	1	0.947886	1.00143	-1	1	0.832297	0.899741	-1	1	0.869417	1.01065	-1	1	0.993324	1.06592	0	1	0.910301	0.993163	-1	1	0.895717	0.973499	-1	1	0.970662	1.08699	-1	1	1.16235	1.02054	1	0	0.60142	0.801596	-1	1	0.888124	0.942946	-1	1	0.927283	1.05668	-1	1
YDL130W_evolved2	YDL130W	0.929031	0.396794	-1	0	0.947886	0.954274	-1	0	0.832297	0.666484	-1	-1	0.869417	0.345443	-1	-1	0.993324	0.992753	0	0	0.910301	0.989445	-1	1	0.895717	0.986078	-1	1	0.970662	0.88007	-1	0	1.16235	0.860175	1	0	0.60142	0.563949	-1	-1	0.888124	0.872125	-1	0	0.927283	0.882221	-1	0
YDL130W_evolved3	YDL130W	0.929031	0.379566	-1	0	0.947886	1.01805	-1	1	0.832297	0.64124	-1	-1	0.869417	1.19427	-1	1	0.993324	0.964507	0	-1	0.910301	0.918474	-1	0	0.895717	0.909045	-1	0	0.970662	0.938793	-1	0	1.16235	1.05341	1	0	0.60142	0.440743	-1	-1	0.888124	0.903911	-1	0	0.927283	0.0845609	-1	0
YDL151C_evolved1	YDL151C	0.896877	1.00671	-1	1	0.61577	0.822283	-1	1	0.817987	0.979436	-1	1	0.734423	0.649841	-1	-1	0.948265	0.992214	-1	1	0.905243	0.974704	-1	1	0.785914	0.872567	-1	1	0.767157	0.900726	-1	1	0.543073	1.05166	-1	1	0.769336	0.545697	-1	-1	0.757056	1.02644	-1	1	0.913478	0.930495	-1	0
YDL151C_evolved2	YDL151C	0.896877	0.602824	-1	0	0.61577	0.593718	-1	0	0.817987	0.725338	-1	-1	0.734423	0.761992	-1	0	0.948265	0.998042	-1	1	0.905243	0.942123	-1	1	0.785914	0.875313	-1	1	0.767157	0.69838	-1	0	0.543073	1.13029	-1	1	0.769336	0.394384	-1	-1	0.757056	0.962464	-1	1	0.913478	0.938159	-1	0
YDL151C_evolved3	YDL151C	0.896877	0.628867	-1	0	0.61577	0.625903	-1	0	0.817987	0.306296	-1	-1	0.734423	0.138184	-1	-1	0.948265	0.945735	-1	0	0.905243	0.905741	-1	0	0.785914	0.83042	-1	1	0.767157	0.61994	-1	0	0.543073	0.918396	-1	1	0.769336	0.394373	-1	-1	0.757056	0.890396	-1	1	0.913478	0.898293	-1	0
YDL160C_evolved3	YDL160C	0.617588	0.172839	-1	0	0.386993	0.467283	-1	0	NA	NA	NA	NA	0.881751	0.880391	-1	0	0.895495	0.975582	-1	0	0.797671	1.00745	-1	1	0.702576	0.949541	-1	1	0.702928	0.850391	-1	0	0.236941	0.567626	-1	1	0.32161	0.36562	-1	0	0.262586	0.8456	-1	1	0.816896	0.835431	-1	0
YDL160C_evolved4	YDL160C	0.617588	0.85008	-1	1	0.386993	0.497865	-1	0	NA	NA	NA	NA	0.881751	1.03031	-1	0	0.895495	0.996374	-1	0	0.797671	1.02862	-1	1	0.702576	0.886826	-1	1	0.702928	0.95276	-1	0	0.236941	0.664644	-1	1	0.32161	0.465524	-1	1	0.262586	0.932781	-1	1	0.816896	0.795236	-1	0
YDL198C_evolved3	YDL198C	0.262324	0.561556	-1	1	0.571349	0.855844	-1	1	0.589166	1.0971	-1	1	0.58668	0.324793	-1	-1	0.922592	0.97978	-1	1	0.887699	0.780644	-1	0	0.652756	0.854735	-1	1	0.59914	0.829827	-1	1	0.364509	0.630498	-1	0	0.547993	0.619475	-1	0	0.745629	0.889323	-1	1	0.781936	0.761354	-1	0
YDL198C_evolved4	YDL198C	0.262324	0.719699	-1	1	0.571349	0.547337	-1	0	0.589166	1.01983	-1	1	0.58668	0.413342	-1	-1	0.922592	1.15392	-1	1	0.887699	1.06863	-1	0	0.652756	0.892605	-1	1	0.59914	0.91976	-1	1	0.364509	0.785801	-1	0	0.547993	0.493903	-1	0	0.745629	0.899075	-1	1	0.781936	0.706342	-1	0
YDR017C_evolved1	YDR017C	0.633725	0.203693	-1	0	0.990265	0.843473	-1	0	1.2247	1.04317	1	0	0.334946	0.278665	-1	0	1.00725	0.960956	0	0	0.82352	0.846369	-1	0	0.785983	0.864801	-1	1	0.724204	0.866864	-1	1	0.813324	0.868433	0	0	0.401409	0.511184	-1	0	0.963273	0.932997	0	0	0.841849	0.826144	-1	0
YDR017C_evolved2	YDR017C	0.633725	0.121188	-1	0	0.990265	0.742094	-1	-1	1.2247	1.00259	1	0	0.334946	0.149891	-1	0	1.00725	0.84004	0	0	0.82352	0.756012	-1	0	0.785983	0.814848	-1	1	0.724204	0.766714	-1	0	0.813324	0.868592	0	0	0.401409	0.590764	-1	1	0.963273	0.92972	0	0	0.841849	0.809089	-1	0
YDR017C_evolved3	YDR017C	0.633725	0.557374	-1	0	0.990265	0.8091	-1	0	1.2247	0.931883	1	-1	0.334946	0.290039	-1	0	1.00725	1.01851	0	0	0.82352	0.809306	-1	0	0.785983	0.829672	-1	1	0.724204	0.892463	-1	1	0.813324	0.769411	0	0	0.401409	0.530563	-1	0	0.963273	0.949113	0	0	0.841849	0.781416	-1	0
YDR065W_evolved1	YDR065W	0.34398	0.446489	-1	1	0.540047	0.563822	-1	0	0.969828	1.03057	0	0	0.649674	0.919495	-1	1	NA	NA	NA	NA	NA	NA	NA	NA	0.57775	0.699661	-1	1	0.561418	0.759577	-1	1	0.0435665	0.0362241	-1	0	0.602851	0.878502	-1	1	NA	NA	NA	NA	NA	NA	NA	NA
YDR065W_evolved2	YDR065W	0.34398	0.336626	-1	0	0.540047	0.610511	-1	1	0.969828	1.15634	0	1	0.649674	0.822535	-1	1	NA	NA	NA	NA	NA	NA	NA	NA	0.57775	0.667332	-1	1	0.561418	0.675097	-1	1	0.0435665	NA	-1	NA	0.602851	0.720393	-1	1	NA	NA	NA	NA	NA	NA	NA	NA
YDR136C_evolved2	YDR136C	0.279274	0.714841	-1	1	0.736503	1.15715	-1	1	0.453114	0.511002	-1	1	0.873872	0.658735	-1	-1	0.793903	1.05313	-1	1	0.785977	0.932482	-1	1	0.880205	0.954958	-1	1	0.542231	0.843749	-1	1	0.393841	0.651878	-1	1	0.685447	0.434545	-1	-1	0.523512	0.907413	-1	1	0.79693	0.954847	-1	1
YDR237W_evolved2	YDR237W	0.453575	0.43064	-1	0	0.670979	0.723319	-1	0	0.984093	0.890913	0	-1	0.870377	0.852551	-1	0	NA	NA	NA	NA	NA	NA	NA	NA	0.707725	0.68847	-1	0	0.672714	0.633116	-1	0	NA	NA	NA	NA	0.800801	0.803753	-1	0	0.826735	NA	0	NA	NA	NA	NA	NA
YDR241W_evolved1	YDR241W	0.932946	0.868329	-1	0	0.814792	0.7964	-1	0	1.02869	0.760149	0	-1	1.03321	0.938631	0	-1	0.899374	0.803399	-1	-1	0.884315	0.838384	-1	-1	0.920216	0.941111	-1	0	1.00776	1.08194	0	1	0.398384	0.250816	-1	0	1.01074	1.05556	0	0	0.677492	0.59457	-1	0	0.847094	0.80624	-1	0
YDR363W_evolved1	YDR363W	0.782591	0.830054	-1	0	0.825293	0.841184	-1	0	0.823141	0.935761	-1	1	1.23715	1.21774	1	0	0.885586	0.970078	-1	1	0.989481	0.983362	0	0	0.931996	0.967463	-1	0	0.648112	0.778996	-1	1	0.901379	0.768916	0	0	1.00808	1.05657	0	1	0.838596	0.864692	-1	0	0.958588	0.96766	-1	0
YDR363W_evolved3	YDR363W	0.782591	0.799279	-1	0	0.825293	0.801235	-1	0	0.823141	0.137983	-1	-1	1.23715	1.02284	1	-1	0.885586	0.908617	-1	0	0.989481	0.945613	0	0	0.931996	0.870773	-1	0	0.648112	0.93605	-1	1	0.901379	1.08634	0	1	1.00808	0.881353	0	-1	0.838596	0.951136	-1	1	0.958588	0.958306	-1	0
YDR369C_evolved1	YDR369C	0.927878	0.8006	-1	0	0.833516	0.774974	-1	-1	0.92393	0.814572	-1	-1	0.814651	0.724137	-1	-1	0.876689	0.938558	-1	1	0.829786	0.924305	-1	1	0.829062	0.827694	-1	0	0.833012	0.841045	-1	0	0.687597	0.857487	-1	1	0.865567	0.704709	-1	-1	0.733672	0.979501	-1	1	0.916642	0.97539	-1	0
YDR382W_evolved1	YDR382W	0.619506	0.538862	-1	0	0.779269	0.869986	-1	1	0.725084	0.665101	-1	0	1.13745	1.18638	1	1	0.873733	1.01763	-1	1	0.740627	0.952679	-1	1	0.760543	0.906641	-1	1	0.912579	0.905736	-1	0	0.744326	0.933677	-1	1	0.591507	0.667911	-1	0	0.770114	1.02734	-1	1	0.78886	1.04591	-1	1
YDR432W_evolved1	YDR432W	NA	NA	NA	NA	0.665	1.09053	-1	1	0.434525	0.193873	-1	-1	0.135088	0.724148	-1	1	0.44852	0.822401	-1	1	0.609941	0.786004	-1	1	0.707056	0.888908	-1	1	0.420327	0.787673	-1	1	0.267928	0.752604	-1	1	0.558461	1.01125	-1	1	0.391278	0.860874	-1	1	0.780165	0.776467	-1	0
YDR432W_evolved2	YDR432W	NA	NA	NA	NA	0.665	0.872713	-1	1	0.434525	0.0499458	-1	-1	0.135088	0.499845	-1	1	0.44852	0.791355	-1	1	0.609941	0.947451	-1	1	0.707056	0.924602	-1	1	0.420327	0.638141	-1	1	0.267928	0.932132	-1	1	0.558461	0.485068	-1	0	0.391278	1.0916	-1	1	0.780165	0.952337	-1	1
YDR432W_evolved3	YDR432W	NA	NA	NA	NA	0.665	0.703224	-1	0	0.434525	0.360707	-1	0	0.135088	0.0651084	-1	0	0.44852	0.675812	-1	1	0.609941	0.775335	-1	1	0.707056	0.757277	-1	1	0.420327	0.561929	-1	1	0.267928	0.574575	-1	1	0.558461	0.459348	-1	0	0.391278	0.799196	-1	1	0.780165	0.484961	-1	0
YDR484W_evolved1	YDR484W	0.289735	0.603332	-1	1	0.99997	1.00029	0	0	0.400295	0.631057	-1	1	0.450105	1.1393	-1	1	0.733703	0.96722	-1	1	0.729019	0.929834	-1	1	0.86827	0.939089	-1	1	0.729137	0.945454	-1	1	0.444472	0.889233	-1	1	0.0496156	0.0504911	-1	0	0.409036	0.825405	-1	1	0.69759	0.826769	-1	1
YDR484W_evolved2	YDR484W	0.289735	0.64709	-1	1	0.99997	1.13329	0	1	0.400295	0.668217	-1	1	0.450105	1.1928	-1	1	0.733703	0.932163	-1	1	0.729019	0.861946	-1	0	0.86827	0.980567	-1	1	0.729137	0.95865	-1	1	0.444472	0.756628	-1	1	0.0496156	0.0425262	-1	0	0.409036	0.695967	-1	1	0.69759	0.877072	-1	1
YDR484W_evolved3	YDR484W	0.289735	0.330809	-1	0	0.99997	1.27191	0	1	0.400295	0.830056	-1	1	0.450105	0.998524	-1	1	0.733703	0.932154	-1	1	0.729019	0.946591	-1	1	0.86827	0.936363	-1	1	0.729137	1.02426	-1	1	0.444472	1.05989	-1	1	0.0496156	0.0395953	-1	0	0.409036	0.810171	-1	1	0.69759	0.964849	-1	1
YDR484W_evolved4	YDR484W	0.289735	0.57752	-1	1	0.99997	1.06851	0	1	0.400295	0.53453	-1	1	0.450105	1.02632	-1	1	0.733703	0.945571	-1	1	0.729019	0.85328	-1	0	0.86827	0.773449	-1	0	0.729137	0.814585	-1	1	0.444472	0.726445	-1	1	0.0496156	0.034748	-1	0	0.409036	0.694894	-1	1	0.69759	0.666008	-1	0
YER014W_evolved1	YER014W	0.43052	0.423098	-1	0	0.352015	0.324489	-1	0	1.01097	1.03638	0	0	1.06804	1.02106	1	0	NA	NA	NA	NA	NA	NA	NA	NA	0.683435	0.750824	-1	1	0.639305	0.732448	-1	1	0.0484276	0.0504073	-1	0	0.873361	1.00194	-1	1	NA	NA	NA	NA	0.612299	1.00161	0	0
YER016W_evolved2	YER016W	0.972935	0.837926	0	0	0.845918	0.78963	-1	0	0.953582	0.878263	0	-1	0.797462	0.750003	-1	0	0.943941	1.00291	-1	1	0.874235	0.887265	-1	0	0.939584	0.969311	-1	0	0.736087	0.927585	-1	1	0.727889	0.972654	-1	1	0.986771	0.905707	0	0	0.778537	0.975069	-1	1	0.821577	0.872624	-1	0
YER083C_evolved1	YER083C	0.0477668	0.164768	-1	0	0.903037	0.779759	-1	0	0.136657	0.0644418	-1	0	0.767457	0.905647	-1	1	0.541983	0.734471	-1	1	0.614084	0.848249	-1	1	0.817673	0.865842	-1	1	0.746583	0.923802	-1	1	0.275515	0.379319	-1	1	0.0744395	0.055552	-1	0	0.168184	0.22089	-1	0	0.744585	0.8523	-1	1
YER083C_evolved3	YER083C	0.0477668	0.188483	-1	0	0.903037	0.841663	-1	0	0.136657	0.0462089	-1	-1	0.767457	0.953156	-1	1	0.541983	0.861051	-1	1	0.614084	0.896201	-1	1	0.817673	0.885632	-1	1	0.746583	0.814503	-1	1	0.275515	0.443564	-1	1	0.0744395	0.0581518	-1	0	0.168184	0.367629	-1	1	0.744585	0.715967	-1	0
YER087W_evolved1	YER087W	0.342407	0.35442	-1	0	0.669542	0.756936	-1	1	1.20452	1.18952	1	0	0.839418	0.98882	-1	1	NA	NA	NA	NA	NA	NA	NA	NA	0.63534	0.694175	-1	1	0.632481	0.738575	-1	1	0.0368783	NA	-1	NA	0.940524	1.17478	-1	1	NA	NA	NA	NA	1.02597	0.475956	0	0
YER087W_evolved2	YER087W	0.342407	0.176681	-1	0	0.669542	0.688523	-1	0	1.20452	1.15203	1	0	0.839418	0.736282	-1	-1	NA	NA	NA	NA	NA	NA	NA	NA	0.63534	0.45784	-1	0	0.632481	0.596748	-1	0	0.0368783	NA	-1	NA	0.940524	0.750726	-1	-1	NA	NA	NA	NA	1.02597	0.863247	0	0
YFR001W_evolved1	YFR001W	0.317685	0.54468	-1	0	0.549742	0.750745	-1	1	0.640986	0.801385	-1	1	0.41018	0.466805	-1	0	0.728329	0.955302	-1	1	0.868852	0.990771	-1	1	0.55228	0.804385	-1	0	0.810369	0.913161	-1	1	1.06578	1.03198	0	0	0.385533	0.803353	-1	1	1.07947	1.12372	0	0	0.988948	1.05921	0	1
YFR001W_evolved2	YFR001W	0.317685	0.725422	-1	1	0.549742	0.86499	-1	1	0.640986	0.888136	-1	1	0.41018	0.305724	-1	0	0.728329	1.0124	-1	1	0.868852	1.01665	-1	1	0.55228	0.914085	-1	0	0.810369	0.950329	-1	1	1.06578	1.15139	0	1	0.385533	0.572411	-1	1	1.07947	1.19875	0	1	0.988948	1.02023	0	1
YGL070C_evolved1	YGL070C	0.421631	0.353744	-1	0	0.812347	0.766172	-1	0	0.81609	0.733731	-1	0	NA	NA	NA	NA	0.780429	0.755721	-1	0	0.776903	0.897473	-1	1	0.822227	0.817152	-1	0	0.716442	0.694929	-1	0	0.483544	0.992966	-1	1	0.542414	0.499674	-1	0	0.472733	0.84128	-1	1	0.793895	0.878928	-1	1
YGL070C_evolved4	YGL070C	0.421631	0.458145	-1	0	0.812347	0.810698	-1	0	0.81609	0.663244	-1	-1	NA	NA	NA	NA	0.780429	0.796883	-1	0	0.776903	0.841466	-1	1	0.822227	0.752678	-1	0	0.716442	0.636827	-1	0	0.483544	0.538582	-1	0	0.542414	0.548067	-1	0	0.472733	0.563292	-1	1	0.793895	0.723559	-1	0
YGL076C_evolved3	YGL076C	0.764578	0.695171	-1	0	0.981861	1.07082	0	1	0.683328	0.865381	-1	1	0.87324	0.377673	-1	-1	0.832595	1.02447	-1	1	0.824595	0.954188	-1	1	0.862452	0.857932	-1	0	0.806856	0.907531	-1	1	0.879995	1.22706	0	1	0.782709	0.657436	-1	-1	0.992247	1.13962	0	1	0.864268	0.919118	-1	1
YGL105W_evolved4	YGL105W	0.681046	1.01241	-1	1	0.91123	1.10706	-1	1	0.517104	0.925239	-1	1	0.954993	0.945949	-1	0	0.84933	1.01473	-1	1	0.808497	0.937957	-1	1	0.774346	1.00911	-1	1	0.726567	0.618866	-1	0	0.755184	0.726482	-1	0	0.770911	0.714024	-1	0	0.752064	0.898771	-1	1	0.846578	0.899725	-1	0
YGL163C_evolved1	YGL163C	0.856474	0.830835	-1	0	0.907116	0.94648	-1	1	0.616279	0.78007	-1	1	0.808364	1.2221	-1	1	0.896806	0.884185	-1	0	0.938547	0.87429	-1	-1	0.862442	0.815358	-1	0	0.656862	0.880012	-1	1	0.982918	0.959695	0	0	0.67855	0.722555	-1	1	1.07446	0.984453	0	0	0.926343	0.914575	-1	0
YGL211W_evolved3	YGL211W	0.818749	0.934508	-1	0	1.09709	1.12781	1	0	0.59362	0.887836	-1	1	0.729269	0.780357	-1	0	0.868018	0.920976	-1	1	0.870361	0.875694	-1	0	0.832219	0.896595	-1	1	0.88122	0.97355	-1	0	0.62945	0.960932	-1	1	0.674509	0.760474	-1	1	0.800743	0.977181	-1	1	0.832238	0.896828	-1	0
YGL219C_evolved2	YGL219C	0.587483	0.894529	-1	1	0.57017	0.826437	-1	1	0.793511	0.849118	-1	0	0.985408	0.97445	0	0	0.394237	0.839332	-1	1	0.509504	0.910617	-1	1	0.773196	0.922218	-1	1	0.671993	0.946561	-1	1	0.444923	0.870063	-1	1	0.799648	0.824146	-1	0	0.513928	0.886093	-1	1	0.652541	0.91699	-1	1
YGL219C_evolved3	YGL219C	0.587483	0.816097	-1	1	0.57017	0.892541	-1	1	0.793511	0.967576	-1	1	0.985408	1.10019	0	1	0.394237	0.921622	-1	1	0.509504	0.895369	-1	1	0.773196	0.94122	-1	1	0.671993	0.955676	-1	1	0.444923	0.59882	-1	1	0.799648	0.885901	-1	1	0.513928	0.79561	-1	1	0.652541	0.897797	-1	1
YGL219C_evolved4	YGL219C	0.587483	0.71342	-1	0	0.57017	0.787573	-1	1	0.793511	0.755921	-1	0	0.985408	0.73945	0	-1	0.394237	0.716589	-1	1	0.509504	0.846104	-1	1	0.773196	0.957149	-1	1	0.671993	0.844818	-1	1	0.444923	0.969474	-1	1	0.799648	0.750358	-1	0	0.513928	0.997291	-1	1	0.652541	0.92192	-1	1
YGL219C_evolved1	YGL219C	0.587483	0.566278	-1	0	0.57017	0.914129	-1	1	0.793511	0.776102	-1	0	0.985408	0.649286	0	-1	0.394237	0.7692	-1	1	0.509504	0.726225	-1	1	0.773196	0.972568	-1	1	0.671993	0.844178	-1	1	0.444923	0.772157	-1	1	0.799648	0.889681	-1	0	0.513928	0.82732	-1	1	0.652541	0.838165	-1	1
YGL223C_evolved1	YGL223C	0.0329766	0.855185	-1	0	0.62427	0.908013	-1	1	0.694895	0.739676	-1	0	0.799182	0.568998	-1	-1	0.635742	0.888814	-1	1	0.598068	0.905961	-1	1	0.636109	0.888759	-1	1	0.317872	0.739422	-1	1	0.527253	0.923159	-1	1	0.625326	0.7209	-1	0	0.637059	0.993533	-1	1	0.764131	0.915558	-1	1
YGL240W_evolved1	YGL240W	0.257324	0.884215	-1	1	0.45531	1.12933	-1	1	0.588461	0.839296	-1	1	0.915634	0.989225	-1	0	NA	NA	NA	NA	NA	NA	NA	NA	0.531246	0.987867	-1	1	0.449997	0.451037	-1	0	NA	NA	NA	NA	0.407276	0.737529	-1	1	NA	NA	NA	NA	NA	NA	NA	NA
YGL240W_evolved2	YGL240W	0.257324	0.346092	-1	0	0.45531	0.570492	-1	1	0.588461	0.71656	-1	1	0.915634	0.79683	-1	0	NA	NA	NA	NA	NA	NA	NA	NA	0.531246	0.626459	-1	1	0.449997	0.512975	-1	1	NA	NA	NA	NA	0.407276	0.717019	-1	1	NA	NA	NA	NA	NA	NA	NA	NA
YGR092W_evolved1	YGR092W	0.652105	1.21948	-1	1	1.04481	1.03624	1	0	0.752461	0.695177	-1	0	0.748322	0.894911	-1	0	0.964667	1.07705	-1	1	0.881886	0.983334	-1	1	0.920122	0.931992	-1	0	0.919495	0.939448	-1	0	0.484354	0.924982	-1	1	1.09001	1.16959	1	1	0.538089	0.868463	-1	1	0.746484	1.02159	-1	1
YGR092W_evolved2	YGR092W	0.652105	0.829273	-1	1	1.04481	1.17522	1	1	0.752461	0.874921	-1	0	0.748322	0.984543	-1	0	0.964667	1.04906	-1	1	0.881886	1.00393	-1	1	0.920122	1.01927	-1	1	0.919495	0.572102	-1	0	0.484354	0.834615	-1	1	1.09001	0.822486	1	-1	0.538089	0.920432	-1	1	0.746484	0.917534	-1	0
YGR092W_evolved3	YGR092W	0.652105	0.782303	-1	1	1.04481	0.919387	1	-1	0.752461	0.599592	-1	-1	0.748322	0.96448	-1	0	0.964667	1.00182	-1	1	0.881886	0.929807	-1	0	0.920122	0.995708	-1	1	0.919495	0.846911	-1	0	0.484354	0.904463	-1	1	1.09001	1.1131	1	0	0.538089	0.827352	-1	1	0.746484	0.917295	-1	0
YGR092W_evolved4	YGR092W	0.652105	0.741937	-1	1	1.04481	1.09765	1	0	0.752461	0.661996	-1	-1	0.748322	0.804353	-1	0	0.964667	0.987758	-1	0	0.881886	0.758985	-1	-1	0.920122	0.99321	-1	1	0.919495	0.98716	-1	0	0.484354	0.974342	-1	1	1.09001	1.03872	1	-1	0.538089	0.704526	-1	1	0.746484	0.924964	-1	0
YGR101W_evolved1	YGR101W	0.42586	1.21093	-1	1	0.610174	0.814242	-1	1	1.03183	0.799726	0	-1	0.937433	0.844805	0	-1	NA	NA	NA	NA	0.0352795	1.08207	-1	0	0.648207	1.03507	-1	1	0.613375	1.12544	-1	1	0.0386716	1.04868	-1	0	0.75284	0.814302	-1	1	NA	NA	NA	NA	NA	NA	NA	NA
YGR104C_evolved1	YGR104C	0.201308	0.448213	-1	1	0.660367	0.675254	-1	0	0.709289	0.721595	-1	0	0.0487799	0.06725	0	0	0.55928	0.651366	-1	1	0.561609	0.695386	-1	1	0.563664	0.606877	-1	1	0.445829	0.44324	-1	0	0.27303	0.62084	-1	1	0.445041	0.237711	-1	-1	0.30495	0.263082	-1	0	0.510219	0.676254	-1	0
YGR104C_evolved3	YGR104C	0.201308	0.380578	-1	1	0.660367	0.636898	-1	0	0.709289	0.609923	-1	-1	0.0487799	0.0573519	0	0	0.55928	0.720177	-1	1	0.561609	0.760215	-1	1	0.563664	0.64892	-1	1	0.445829	0.504591	-1	1	0.27303	0.469066	-1	1	0.445041	0.244331	-1	-1	0.30495	0.158155	-1	0	0.510219	0.703202	-1	0
YGR215W_evolved2	YGR215W	0.385698	0.168515	-1	0	0.554607	0.635275	-1	0	0.972792	0.665897	0	-1	0.913975	0.513049	-1	-1	NA	NA	NA	NA	NA	NA	NA	NA	0.62696	0.623822	-1	0	0.62546	0.644171	-1	1	NA	NA	NA	NA	0.660533	0.625005	-1	0	NA	NA	NA	NA	NA	NA	NA	NA
YGR215W_evolved4	YGR215W	0.385698	0.411977	-1	0	0.554607	0.595342	-1	0	0.972792	1.01525	0	0	0.913975	0.894994	-1	0	NA	NA	NA	NA	NA	NA	NA	NA	0.62696	0.617771	-1	0	0.62546	0.605935	-1	0	NA	NA	NA	NA	0.660533	0.761531	-1	0	NA	NA	NA	NA	NA	NA	NA	NA
YGR252W_evolved1	YGR252W	0.4451	0.300034	-1	0	0.896267	0.834806	-1	0	0.586389	0.0859149	-1	-1	0.148104	0.0510603	-1	0	0.764379	0.657016	-1	-1	0.652625	0.603611	-1	-1	0.77277	0.782692	-1	0	0.631451	0.634604	-1	0	0.455398	0.305542	-1	0	0.770825	0.705605	-1	-1	0.630283	0.621011	-1	0	0.850429	0.698687	-1	0
YGR252W_evolved2	YGR252W	0.4451	0.266648	-1	0	0.896267	1.00582	-1	1	0.586389	0.359798	-1	-1	0.148104	0.0432428	-1	-1	0.764379	0.751215	-1	0	0.652625	0.698935	-1	1	0.77277	0.96548	-1	1	0.631451	0.754278	-1	0	0.455398	0.596969	-1	1	0.770825	0.775368	-1	0	0.630283	0.772547	-1	1	0.850429	0.86895	-1	0
YGR272C_evolved3	YGR272C	0.303131	0.199479	-1	0	0.750095	0.790835	-1	0	0.132288	0.187037	-1	0	0.122172	NA	-1	NA	0.714424	0.747106	-1	0	0.646373	0.669821	-1	0	0.616001	0.624219	-1	0	0.597652	0.427797	-1	0	0.33003	0.256837	-1	0	0.668455	0.68935	-1	0	0.306749	0.201601	-1	0	0.624062	0.475488	-1	0
YHR004C_evolved2	YHR004C	0.648437	0.442139	-1	0	0.91493	0.877805	-1	0	0.321204	0.389654	-1	1	0.224337	0.137729	-1	0	0.966105	0.950003	-1	0	0.993519	0.97068	0	0	0.937488	0.977499	-1	1	0.941898	0.92695	-1	0	0.919931	0.927433	0	0	0.714248	0.692531	-1	0	0.957535	0.912294	0	0	0.929579	0.819468	-1	0
YHR004C_evolved3	YHR004C	0.648437	0.640329	-1	0	0.91493	0.883855	-1	0	0.321204	0.317027	-1	0	0.224337	0.487184	-1	0	0.966105	0.98224	-1	0	0.993519	1.00041	0	0	0.937488	0.948585	-1	0	0.941898	0.964339	-1	0	0.919931	0.90204	0	0	0.714248	0.713608	-1	0	0.957535	0.965056	0	0	0.929579	0.94264	-1	0
YHR034C_evolved2	YHR034C	0.852124	0.941049	-1	0	0.94957	0.994722	-1	0	0.433351	0.3764	-1	0	0.789506	0.715304	-1	0	1.03506	1.00023	0	0	0.896851	0.979607	-1	1	0.864642	0.914818	-1	1	0.803906	0.564311	-1	0	0.807649	1.1819	-1	1	0.817601	0.708056	-1	0	0.902048	1.12743	-1	1	0.958769	1.07536	-1	1
YHR034C_evolved3	YHR034C	0.852124	1.06986	-1	1	0.94957	1.10693	-1	1	0.433351	0.516173	-1	0	0.789506	0.732604	-1	0	1.03506	1.11258	0	1	0.896851	0.972285	-1	1	0.864642	0.972255	-1	1	0.803906	0.740712	-1	0	0.807649	0.805669	-1	0	0.817601	0.950982	-1	1	0.902048	0.947378	-1	0	0.958769	0.998521	-1	1
YHR034C_evolved4	YHR034C	0.852124	0.949172	-1	0	0.94957	0.944695	-1	0	0.433351	0.362028	-1	0	0.789506	0.805901	-1	0	1.03506	1.04436	0	0	0.896851	0.867658	-1	0	0.864642	0.90392	-1	1	0.803906	0.593523	-1	0	0.807649	0.779279	-1	0	0.817601	0.871733	-1	0	0.902048	0.876845	-1	0	0.958769	1.00932	-1	0
YHR041C_evolved3	YHR041C	0.386563	0.587782	-1	1	0.859716	0.836646	-1	0	0.871811	0.722205	-1	-1	0.248172	0.0609694	-1	-1	0.632786	0.756274	-1	1	0.761198	0.936823	-1	1	0.765227	0.804132	-1	1	0.556745	0.725148	-1	1	0.357478	0.626362	-1	1	0.451132	0.340076	-1	-1	0.423008	0.642207	-1	1	0.764289	0.818008	-1	1
YHR041C_evolved4	YHR041C	0.386563	0.531593	-1	1	0.859716	0.840906	-1	0	0.871811	0.733946	-1	-1	0.248172	0.15413	-1	0	0.632786	0.815158	-1	1	0.761198	0.927013	-1	1	0.765227	0.839321	-1	1	0.556745	0.733666	-1	1	0.357478	0.488151	-1	1	0.451132	0.272422	-1	-1	0.423008	0.573173	-1	1	0.764289	0.82362	-1	1
YHR059W_evolved2	YHR059W	0.585004	0.591451	-1	0	0.951254	0.989211	0	0	0.909366	0.81403	-1	0	0.350892	0.472853	-1	0	0.830281	0.897069	-1	1	0.768273	0.852676	-1	1	0.86379	0.918545	-1	1	0.927744	0.996665	-1	1	0.708994	0.899572	-1	1	0.725865	0.683499	-1	0	0.740748	0.764056	-1	0	0.850019	0.920994	-1	1
YHR059W_evolved3	YHR059W	0.585004	0.912737	-1	1	0.951254	0.712631	0	-1	0.909366	0.508981	-1	-1	0.350892	0.506508	-1	0	0.830281	1.02667	-1	1	0.768273	0.979881	-1	1	0.86379	0.993334	-1	1	0.927744	0.904099	-1	0	0.708994	1.15734	-1	1	0.725865	0.534716	-1	-1	0.740748	0.932236	-1	1	0.850019	1.00231	-1	1
YHR067W_evolved2	YHR067W	0.294462	1.25478	-1	1	0.577495	0.709339	-1	1	0.75201	0.739145	-1	0	0.87901	0.828455	-1	0	0.669168	1.04739	-1	1	0.597382	1.02191	-1	1	0.709004	1.01439	-1	1	0.637804	1.1515	-1	1	0.0967806	0.891921	-1	1	0.717975	0.90576	-1	1	0.0792717	0.89274	-1	1	0.220851	1.0534	-1	1
YHR067W_evolved3	YHR067W	0.294462	1.02632	-1	1	0.577495	0.951178	-1	1	0.75201	0.947774	-1	1	0.87901	0.341299	-1	-1	0.669168	1.08895	-1	1	0.597382	1.03421	-1	1	0.709004	0.94233	-1	1	0.637804	0.967284	-1	1	0.0967806	1.02265	-1	1	0.717975	0.750667	-1	0	0.0792717	1.01551	-1	1	0.220851	1.02552	-1	1
YIL008W_evolved1	YIL008W	0.689605	1.1109	-1	1	0.931991	0.73252	-1	-1	0.32957	0.668663	-1	1	0.376291	0.916993	-1	1	0.848796	1.05338	-1	1	0.800191	1.04064	-1	1	0.774182	0.992313	-1	1	0.835939	1.13483	-1	1	0.780838	1.00795	-1	1	0.415727	0.895612	-1	1	0.821534	1.01069	-1	1	0.810282	1.05464	-1	1
YJL029C_evolved1	YJL029C	0.389959	0.68505	-1	1	1.05001	1.08324	0	0	0.451753	0.774702	-1	1	0.659206	1.1898	-1	1	0.883843	1.01797	-1	1	0.881635	0.973488	-1	1	0.903276	1.03542	-1	1	0.942966	1.04046	-1	1	0.592562	0.95965	-1	1	0.0629404	0.0680493	-1	0	0.488003	0.925132	-1	1	0.763649	0.914132	-1	1
YJL029C_evolved4	YJL029C	0.389959	0.814609	-1	1	1.05001	1.09098	0	0	0.451753	0.658022	-1	1	0.659206	1.19156	-1	1	0.883843	1.00544	-1	1	0.881635	0.965525	-1	1	0.903276	1.01625	-1	1	0.942966	0.969045	-1	0	0.592562	0.891338	-1	1	0.0629404	0.0699925	-1	0	0.488003	0.774714	-1	1	0.763649	0.87648	-1	1
YJL046W_evolved1	YJL046W	0.419566	0.491095	-1	1	0.723208	0.831519	-1	1	0.854588	0.91719	-1	0	0.845188	0.775647	-1	0	0.508468	0.616529	-1	1	0.463559	0.652227	-1	1	0.779654	0.930891	-1	1	0.706311	0.772268	-1	1	0.0759737	0.0773974	-1	0	0.800694	0.766095	-1	0	0.0842482	NA	-1	NA	0.0800227	0.234595	-1	1
YJL046W_evolved2	YJL046W	0.419566	1.05483	-1	1	0.723208	0.973915	-1	1	0.854588	1.14298	-1	1	0.845188	0.508727	-1	-1	0.508468	0.983814	-1	1	0.463559	0.905252	-1	1	0.779654	0.885389	-1	1	0.706311	0.980774	-1	1	0.0759737	0.824863	-1	1	0.800694	0.981737	-1	1	0.0842482	0.817784	-1	1	0.0800227	0.998282	-1	1
YJL046W_evolved3	YJL046W	0.419566	0.330856	-1	0	0.723208	0.560092	-1	-1	0.854588	0.584295	-1	-1	0.845188	0.941178	-1	0	0.508468	0.492938	-1	0	0.463559	0.61751	-1	1	0.779654	0.865718	-1	1	0.706311	0.792948	-1	1	0.0759737	0.123394	-1	0	0.800694	0.840369	-1	0	0.0842482	0.0980719	-1	0	0.0800227	0.122174	-1	1
YJL047C_evolved2	YJL047C	1.00062	1.0454	0	1	0.953911	1.15145	-1	1	0.802119	0.949467	-1	1	0.851463	0.965912	-1	0	0.874638	1.01661	-1	1	0.847092	0.971604	-1	1	0.909486	0.985781	-1	1	0.879444	1.07942	-1	1	0.588769	1.0193	-1	1	0.85725	0.947101	-1	1	0.760935	0.996157	-1	1	0.878079	0.946453	-1	1
YJL047C_evolved3	YJL047C	1.00062	1.05255	0	1	0.953911	0.970018	-1	0	0.802119	0.884766	-1	1	0.851463	0.876147	-1	0	0.874638	1.05303	-1	1	0.847092	0.949271	-1	1	0.909486	0.950696	-1	1	0.879444	1.02101	-1	1	0.588769	0.999275	-1	1	0.85725	0.951457	-1	1	0.760935	1.05815	-1	1	0.878079	0.98419	-1	1
YJL062W-A_evolved1	YJL062W-A	0.409954	0.353151	-1	0	0.66931	0.368471	-1	-1	0.926199	0.628618	-1	-1	1.06383	1.00528	1	0	NA	NA	NA	NA	NA	NA	NA	NA	0.730087	0.751334	-1	1	0.679457	0.746641	-1	1	0.0422343	0.0475768	-1	0	1.0221	0.89684	0	-1	NA	NA	NA	NA	0.918927	0.633892	-1	0
YJL180C_evolved1	YJL180C	0.149684	0.453182	-1	1	0.413758	0.367679	-1	0	0.43334	1.00216	-1	1	0.129529	0.636753	-1	1	NA	NA	NA	NA	NA	NA	NA	NA	0.538636	0.639375	-1	1	0.40498	0.673749	-1	1	NA	NA	NA	NA	0.491074	0.740508	-1	1	NA	NA	NA	NA	NA	NA	NA	NA
YJL180C_evolved2	YJL180C	0.149684	0.200774	-1	0	0.413758	0.273076	-1	-1	0.43334	0.169651	-1	-1	0.129529	0.221396	-1	0	NA	NA	NA	NA	NA	NA	NA	NA	0.538636	0.5958	-1	1	0.40498	0.530141	-1	1	NA	NA	NA	NA	0.491074	0.458024	-1	0	NA	NA	NA	NA	NA	NA	NA	NA
YJL180C_evolved3	YJL180C	0.149684	0.357737	-1	1	0.413758	0.392468	-1	0	0.43334	0.406719	-1	0	0.129529	0.891432	-1	1	NA	NA	NA	NA	NA	NA	NA	NA	0.538636	0.63761	-1	1	0.40498	0.626812	-1	1	NA	NA	NA	NA	0.491074	0.769758	-1	1	NA	NA	NA	NA	NA	NA	NA	NA
YJL180C_evolved4	YJL180C	0.149684	0.392134	-1	1	0.413758	0.30091	-1	0	0.43334	0.466966	-1	0	0.129529	0.654596	-1	1	NA	NA	NA	NA	NA	NA	NA	NA	0.538636	0.654035	-1	1	0.40498	0.52993	-1	1	NA	NA	NA	NA	0.491074	0.649728	-1	1	NA	NA	NA	NA	NA	NA	NA	NA
YJR118C_evolved2	YJR118C	0.62297	0.801202	-1	1	1.0155	1.07323	0	0	0.402897	0.551876	-1	1	1.13543	1.12306	1	0	1.03229	1.0466	0	0	0.925544	1.01138	-1	1	0.783232	0.917723	-1	1	0.92232	0.963833	-1	0	0.827375	1.13032	-1	1	0.408937	0.521071	-1	1	0.889431	1.03506	-1	1	1.03167	1.11146	0	1
YJR118C_evolved3	YJR118C	0.62297	0.805196	-1	1	1.0155	1.16468	0	1	0.402897	0.793561	-1	1	1.13543	1.18439	1	0	1.03229	1.15366	0	1	0.925544	1.00866	-1	1	0.783232	0.9254	-1	1	0.92232	1.1268	-1	1	0.827375	0.778791	-1	0	0.408937	0.788512	-1	1	0.889431	0.963694	-1	1	1.03167	1.0877	0	1
YJR122W_evolved1	YJR122W	0.361542	0.437967	-1	1	0.614928	0.627098	-1	0	0.717079	0.871833	-1	1	0.777982	1.33298	-1	1	NA	NA	NA	NA	NA	NA	NA	NA	0.676427	0.682513	-1	0	0.584476	0.667267	-1	1	0.0395631	NA	-1	NA	0.890492	0.909716	-1	0	NA	NA	NA	NA	0.03402	NA	-1	NA
YJR122W_evolved3	YJR122W	0.361542	0.618641	-1	1	0.614928	0.74405	-1	1	0.717079	0.311495	-1	-1	0.777982	0.480725	-1	-1	NA	NA	NA	NA	NA	NA	NA	NA	0.676427	1.10433	-1	1	0.584476	1.06385	-1	1	0.0395631	1.0279	-1	1	0.890492	0.664029	-1	-1	NA	NA	NA	NA	0.03402	1.0486	-1	0
YJR144W_evolved1	YJR144W	0.387706	0.15949	-1	0	0.648615	0.880457	-1	1	0.874819	0.690458	-1	-1	0.949533	NA	0	NA	NA	NA	NA	NA	NA	NA	NA	NA	0.705108	0.989969	-1	1	0.660433	0.795349	-1	1	0.0365292	0.907799	0	0	0.818498	0.859273	-1	0	NA	NA	NA	NA	0.0327173	0.870539	-1	0
YJR145C_evolved1	YJR145C	0.149076	NA	-1	NA	0.912047	0.897421	-1	0	0.692202	0.725541	-1	1	0.0572021	0.403028	-1	0	1.01049	1.02023	0	0	1.00563	1.0074	0	0	0.953348	1.00853	-1	1	0.850959	0.858235	-1	0	0.913982	0.935843	0	0	0.762113	0.895948	-1	0	0.927792	0.891466	-1	0	0.869966	0.883557	-1	0
YJR145C_evolved2	YJR145C	0.149076	0.139527	-1	0	0.912047	0.903073	-1	0	0.692202	0.724767	-1	0	0.0572021	1.26038	-1	0	1.01049	1.02504	0	0	1.00563	1.02841	0	1	0.953348	1.05507	-1	1	0.850959	0.804974	-1	0	0.913982	0.978983	0	0	0.762113	0.797443	-1	0	0.927792	0.903743	-1	0	0.869966	0.8839	-1	0
YJR145C_evolved3	YJR145C	0.149076	0.417564	-1	0	0.912047	0.941257	-1	0	0.692202	0.850501	-1	1	0.0572021	0.7394	-1	0	1.01049	1.0666	0	1	1.00563	0.910658	0	-1	0.953348	0.969465	-1	0	0.850959	0.895711	-1	0	0.913982	0.680224	0	0	0.762113	0.840199	-1	0	0.927792	0.906929	-1	0	0.869966	0.863462	-1	0
YJR145C_evolved4	YJR145C	0.149076	0.242345	-1	0	0.912047	0.926828	-1	0	0.692202	0.837817	-1	1	0.0572021	0.0487245	-1	0	1.01049	1.05762	0	1	1.00563	1.0318	0	1	0.953348	0.947722	-1	0	0.850959	0.968352	-1	0	0.913982	0.806764	0	0	0.762113	0.868167	-1	0	0.927792	0.874273	-1	0	0.869966	0.780958	-1	0
YKL057C_evolved2	YKL057C	0.53685	0.578013	-1	0	0.87229	0.984442	-1	0	0.948067	0.702047	-1	-1	0.829248	0.52201	-1	0	0.813622	0.909062	-1	1	0.819701	0.889003	-1	1	0.733398	0.843747	-1	1	0.663157	0.762214	-1	1	0.573016	0.738906	-1	1	0.835906	0.816122	-1	0	0.785525	0.911801	-1	1	0.881963	1.03841	-1	1
YKL057C_evolved3	YKL057C	0.53685	0.701565	-1	0	0.87229	1.07971	-1	0	0.948067	0.705439	-1	-1	0.829248	0.448812	-1	-1	0.813622	0.913199	-1	1	0.819701	0.895995	-1	1	0.733398	0.811294	-1	1	0.663157	0.846449	-1	1	0.573016	0.807846	-1	1	0.835906	0.75947	-1	0	0.785525	0.868174	-1	1	0.881963	0.872782	-1	0
YKL057C_evolved4	YKL057C	0.53685	0.613311	-1	0	0.87229	0.843357	-1	0	0.948067	0.623318	-1	-1	0.829248	0.626971	-1	0	0.813622	1.04959	-1	1	0.819701	1.04983	-1	1	0.733398	0.837012	-1	1	0.663157	0.782355	-1	1	0.573016	1.01641	-1	1	0.835906	0.737732	-1	-1	0.785525	0.997099	-1	1	0.881963	1.03161	-1	1
YKL119C_evolved1	YKL119C	NA	NA	NA	NA	0.629296	0.631025	-1	0	0.54788	0.133275	-1	-1	0.579406	0.395782	-1	0	0.195237	0.506336	-1	1	0.230794	0.726646	-1	1	0.634419	0.77559	-1	1	0.547313	0.65525	-1	1	0.042692	0.245358	-1	1	0.641138	0.628961	-1	0	NA	NA	NA	NA	0.0811155	0.663183	-1	1
YKL204W_evolved4	YKL204W	0.387627	0.53076	-1	0	0.683522	0.467777	-1	0	0.640704	0.356615	-1	-1	0.107674	0.200318	-1	0	0.883478	1.07929	-1	1	0.855059	0.95921	-1	1	0.848961	0.93441	-1	1	0.845853	1.05436	-1	1	0.616074	0.892907	-1	1	0.341277	0.634278	-1	1	0.88435	0.907978	-1	0	0.912829	0.950824	-1	1
YKL212W_evolved1	YKL212W	0.245207	0.4389	-1	1	0.920143	0.924665	-1	0	1.16776	0.813144	1	-1	0.497564	0.379121	-1	-1	0.82197	0.877505	-1	1	0.804289	0.904031	-1	1	0.821464	0.877191	-1	0	0.746718	0.764654	-1	0	0.125472	0.539938	-1	1	0.0641362	0.0412716	-1	-1	0.341064	0.859327	-1	1	0.80248	0.836528	-1	1
YKL212W_evolved2	YKL212W	0.245207	0.0776617	-1	0	0.920143	0.871175	-1	0	1.16776	0.59887	1	-1	0.497564	0.138939	-1	-1	0.82197	0.819122	-1	0	0.804289	0.807147	-1	0	0.821464	0.843866	-1	0	0.746718	0.818801	-1	1	0.125472	0.286888	-1	0	0.0641362	0.0606022	-1	0	0.341064	0.760005	-1	1	0.80248	0.768526	-1	0
YKL212W_evolved3	YKL212W	0.245207	0.992233	-1	1	0.920143	1.09338	-1	1	1.16776	1.05413	1	0	0.497564	1.01082	-1	1	0.82197	1.12516	-1	1	0.804289	0.985562	-1	1	0.821464	1.03623	-1	1	0.746718	1.26793	-1	1	0.125472	1.07355	-1	1	0.0641362	0.709321	-1	1	0.341064	1.17906	-1	1	0.80248	1.00423	-1	1
YKR074W_evolved1	YKR074W	0.582814	0.648379	-1	0	0.843084	0.847647	-1	0	0.617594	0.228132	-1	-1	0.477446	0.45876	-1	0	0.891686	0.937237	-1	1	0.849223	0.860236	-1	0	0.847405	0.920454	-1	1	0.841762	0.952331	-1	1	0.82512	0.823707	-1	0	0.696332	0.684257	-1	0	1.03359	1.1225	0	1	0.908806	1.08589	-1	1
YLR074C_evolved4	YLR074C	0.655737	0.902344	-1	1	0.825404	1.23443	-1	1	0.62312	0.720816	-1	1	0.890051	0.691153	-1	0	0.828871	1.06616	-1	1	0.784303	0.970323	-1	1	0.717548	0.882727	-1	1	0.733642	0.941084	-1	1	0.809676	1.30041	0	1	0.727979	0.602466	-1	-1	0.820441	1.18766	-1	1	0.785672	1.00703	-1	1
YLR074C_evolved3	YLR074C	0.655737	0.586336	-1	0	0.825404	0.924781	-1	0	0.62312	0.186845	-1	-1	0.890051	0.460275	-1	-1	0.828871	0.990499	-1	1	0.784303	1.00628	-1	1	0.717548	0.839569	-1	1	0.733642	0.66229	-1	0	0.809676	1.06912	0	1	0.727979	0.602594	-1	-1	0.820441	1.00682	-1	0	0.785672	0.972451	-1	1
YLR074C_evolved1	YLR074C	0.655737	0.861668	-1	1	0.825404	1.1638	-1	1	0.62312	0.495428	-1	-1	0.890051	0.708153	-1	-1	0.828871	1.04381	-1	1	0.784303	0.971407	-1	1	0.717548	0.809599	-1	1	0.733642	0.932234	-1	1	0.809676	1.06872	0	1	0.727979	0.674706	-1	0	0.820441	1.09051	-1	1	0.785672	1.0132	-1	1
YLR079W_evolved2	YLR079W	0.579685	0.690071	-1	1	0.880074	0.803524	-1	0	0.704429	0.562376	-1	-1	0.526637	0.776723	-1	1	0.640459	0.929638	-1	1	0.721926	0.959338	-1	1	0.738255	0.876413	-1	1	0.689482	0.902776	-1	1	0.4801	0.964613	-1	0	0.758696	0.856812	-1	1	0.499611	1.06164	-1	1	0.790158	0.912495	-1	1
YLR079W_evolved4	YLR079W	0.579685	0.662404	-1	0	0.880074	0.921635	-1	0	0.704429	0.644847	-1	-1	0.526637	0.714383	-1	1	0.640459	0.895935	-1	1	0.721926	0.921223	-1	1	0.738255	0.836932	-1	1	0.689482	0.806818	-1	1	0.4801	0.932186	-1	0	0.758696	0.787487	-1	0	0.499611	0.913889	-1	1	0.790158	0.851403	-1	0
YLR226W_evolved2	YLR226W	0.595686	0.289703	-1	0	0.925038	0.783701	-1	-1	0.408085	0.0277728	-1	0	0.104895	NA	-1	NA	0.850496	0.805269	-1	0	0.750835	0.815979	-1	1	0.662609	0.640871	-1	0	0.613996	0.566491	-1	0	0.364719	0.419421	-1	1	0.450192	0.387716	-1	0	0.217348	0.31415	-1	1	0.64776	0.71894	-1	0
YLR239C_evolved1	YLR239C	0.421799	0.458245	-1	0	0.666552	0.686154	-1	0	0.883433	0.897026	-1	0	0.856268	0.87638	-1	0	0.74883	0.802598	-1	1	0.626634	0.68956	-1	1	0.78743	0.784997	-1	0	0.67809	0.766984	-1	1	0.0965569	0.0869161	-1	0	0.738474	0.754068	-1	0	0.103726	0.0785425	-1	0	0.246673	0.266439	-1	0
YLR239C_evolved2	YLR239C	0.421799	0.436484	-1	0	0.666552	0.676202	-1	0	0.883433	0.9733	-1	0	0.856268	0.802594	-1	0	0.74883	0.801174	-1	1	0.626634	0.62426	-1	0	0.78743	0.797313	-1	0	0.67809	0.727116	-1	1	0.0965569	0.0764754	-1	0	0.738474	0.717841	-1	0	0.103726	0.0854102	-1	0	0.246673	0.295839	-1	1
YLR239C_evolved3	YLR239C	0.421799	0.482752	-1	0	0.666552	0.793083	-1	1	0.883433	0.923585	-1	0	0.856268	0.824693	-1	0	0.74883	0.867015	-1	1	0.626634	0.605043	-1	0	0.78743	0.806105	-1	0	0.67809	0.804378	-1	1	0.0965569	0.518771	-1	1	0.738474	0.669848	-1	0	0.103726	0.531201	-1	1	0.246673	0.539229	-1	1
YLR239C_evolved4	YLR239C	0.421799	0.425588	-1	0	0.666552	0.686265	-1	0	0.883433	0.761318	-1	-1	0.856268	0.742785	-1	-1	0.74883	0.771603	-1	0	0.626634	0.667516	-1	0	0.78743	0.884244	-1	1	0.67809	0.763206	-1	1	0.0965569	0.18291	-1	0	0.738474	0.764846	-1	0	0.103726	0.135893	-1	0	0.246673	0.16727	-1	0
YLR320W_evolved1	YLR320W	0.80235	0.807287	-1	0	0.885342	1.0718	-1	1	0.693365	0.519356	-1	-1	0.768157	0.510275	-1	0	0.816681	0.999761	-1	1	0.776967	0.964469	-1	1	0.771328	0.875134	-1	1	0.8788	0.987636	-1	1	0.409289	0.897494	-1	1	0.880568	0.854885	-1	0	0.558624	0.954053	-1	1	0.814114	0.896656	-1	1
YLR320W_evolved3	YLR320W	0.80235	0.506798	-1	0	0.885342	0.914814	-1	0	0.693365	0.451115	-1	-1	0.768157	0.638239	-1	-1	0.816681	1.02127	-1	1	0.776967	0.968791	-1	1	0.771328	0.835049	-1	1	0.8788	0.729792	-1	0	0.409289	0.976237	-1	1	0.880568	0.906171	-1	0	0.558624	0.891142	-1	1	0.814114	0.920817	-1	1
YLR322W_evolved1	YLR322W	0.364063	0.403738	-1	0	0.414837	0.503305	-1	0	0.124904	0.205174	-1	0	0.239245	0.548386	-1	1	0.850435	0.856174	-1	0	0.920189	0.899101	-1	0	0.82019	0.801119	-1	0	0.574725	0.597893	-1	0	0.481069	0.534399	-1	1	0.546509	0.627477	-1	0	0.702499	0.774013	-1	1	0.873182	0.882254	-1	0
YLR322W_evolved2	YLR322W	0.364063	0.415425	-1	0	0.414837	0.677966	-1	1	0.124904	0.138576	-1	0	0.239245	0.504167	-1	1	0.850435	0.825774	-1	0	0.920189	0.988361	-1	1	0.82019	0.88467	-1	0	0.574725	0.51155	-1	0	0.481069	0.850419	-1	1	0.546509	0.691474	-1	0	0.702499	0.977778	-1	1	0.873182	0.929235	-1	1
YLR322W_evolved3	YLR322W	0.364063	0.719945	-1	1	0.414837	1.11481	-1	1	0.124904	0.623148	-1	1	0.239245	0.586613	-1	1	0.850435	0.884148	-1	1	0.920189	0.891001	-1	0	0.82019	0.867973	-1	1	0.574725	1.05768	-1	1	0.481069	0.913464	-1	1	0.546509	0.907495	-1	1	0.702499	0.826435	-1	1	0.873182	0.883877	-1	0
YLR322W_evolved4	YLR322W	0.364063	0.424356	-1	0	0.414837	0.814363	-1	1	0.124904	0.553288	-1	1	0.239245	0.355874	-1	1	0.850435	0.849756	-1	0	0.920189	0.862294	-1	-1	0.82019	0.875139	-1	1	0.574725	0.698751	-1	1	0.481069	0.980952	-1	1	0.546509	0.808707	-1	1	0.702499	1.02913	-1	1	0.873182	0.983961	-1	1
YLR357W_evolved3	YLR357W	0.373665	0.709495	-1	1	0.412064	0.512042	-1	1	0.452589	0.125711	-1	-1	0.807893	0.814468	-1	0	0.557945	0.677381	-1	1	0.812082	0.814053	-1	0	0.783773	0.813227	-1	1	0.680256	0.832319	-1	1	0.599094	0.824022	-1	1	0.916581	0.89196	-1	0	0.71607	0.661228	-1	0	0.809848	0.855936	-1	0
YLR357W_evolved2	YLR357W	0.373665	0.822968	-1	1	0.412064	0.529782	-1	1	0.452589	0.286042	-1	-1	0.807893	0.756772	-1	0	0.557945	0.691632	-1	1	0.812082	0.931874	-1	1	0.783773	0.89546	-1	1	0.680256	0.848138	-1	1	0.599094	0.8419	-1	1	0.916581	0.94716	-1	0	0.71607	0.865914	-1	1	0.809848	1.03805	-1	1
YLR357W_evolved1	YLR357W	0.373665	0.512762	-1	0	0.412064	0.483058	-1	1	0.452589	0.258106	-1	-1	0.807893	0.891477	-1	1	0.557945	0.711107	-1	1	0.812082	1.0206	-1	1	0.783773	0.944635	-1	1	0.680256	0.826477	-1	1	0.599094	0.826408	-1	1	0.916581	1.00798	-1	1	0.71607	0.914702	-1	1	0.809848	1.03685	-1	1
YLR357W_evolved4	YLR357W	0.373665	0.670009	-1	1	0.412064	0.516876	-1	1	0.452589	0.284428	-1	-1	0.807893	0.803992	-1	0	0.557945	0.723799	-1	1	0.812082	0.962969	-1	1	0.783773	0.945224	-1	1	0.680256	0.822781	-1	1	0.599094	0.75733	-1	1	0.916581	0.922822	-1	0	0.71607	0.625575	-1	0	0.809848	0.904516	-1	1
YLR372W_evolved1	YLR372W	0.498155	0.432616	-1	0	0.788289	0.766812	-1	0	0.891449	0.482501	-1	-1	1.12761	1.03808	1	0	0.787728	0.895185	-1	1	0.758806	0.82497	-1	1	0.801456	0.796545	-1	0	0.506714	0.487738	-1	0	0.55787	0.976681	-1	1	0.874893	0.593279	-1	-1	0.760021	1.0847	-1	1	0.84927	0.984057	-1	1
YLR372W_evolved2	YLR372W	0.498155	0.0312575	-1	0	0.788289	0.757778	-1	0	0.891449	0.487011	-1	-1	1.12761	0.506891	1	-1	0.787728	0.809021	-1	1	0.758806	0.832804	-1	1	0.801456	0.814565	-1	0	0.506714	0.629266	-1	1	0.55787	1.03234	-1	1	0.874893	0.704426	-1	-1	0.760021	1.06976	-1	1	0.84927	0.902731	-1	1
YLR372W_evolved3	YLR372W	0.498155	0.499298	-1	0	0.788289	0.763313	-1	0	0.891449	0.511194	-1	-1	1.12761	0.392093	1	-1	0.787728	0.861689	-1	1	0.758806	0.802592	-1	1	0.801456	0.852792	-1	1	0.506714	0.68271	-1	1	0.55787	1.0068	-1	1	0.874893	0.775246	-1	0	0.760021	1.08997	-1	1	0.84927	0.989306	-1	1
YLR372W_evolved4	YLR372W	0.498155	0.256271	-1	0	0.788289	0.859111	-1	1	0.891449	0.576042	-1	-1	1.12761	0.527636	1	-1	0.787728	0.864851	-1	1	0.758806	0.752454	-1	0	0.801456	0.906353	-1	1	0.506714	0.71918	-1	1	0.55787	0.970105	-1	1	0.874893	0.867927	-1	0	0.760021	1.01911	-1	1	0.84927	1.06588	-1	1
YLR373C_evolved2	YLR373C	0.715962	0.719882	-1	0	0.957677	0.941645	0	0	0.552164	0.297044	-1	-1	0.408698	0.186576	-1	-1	0.964929	1.07969	-1	1	0.914875	0.953973	-1	1	0.906269	0.936095	-1	0	0.887727	1.10613	-1	1	0.779676	0.924792	0	0	0.823948	0.730088	-1	-1	0.885151	1.11074	-1	1	0.8701	0.837087	-1	0
YLR418C_evolved4	YLR418C	0.290138	0.149825	-1	0	0.757924	0.736891	-1	0	0.705061	0.618858	-1	0	0.472126	0.458399	-1	0	0.823249	0.854919	-1	0	0.778641	0.884356	-1	1	0.754199	0.775005	-1	0	0.808107	0.897549	-1	1	0.41795	0.491998	-1	1	0.847961	0.791992	-1	0	0.557555	0.651291	-1	1	0.853708	0.877339	-1	1
YLR448W_evolved1	YLR448W	0.707362	1.06051	-1	1	0.79094	1.19063	-1	1	0.750819	0.326815	-1	-1	0.665709	0.250558	-1	-1	0.935283	1.14687	-1	1	0.873371	1.02216	-1	1	0.801734	1.05858	-1	1	0.842912	1.08594	-1	1	0.837117	0.848988	0	0	0.651794	0.84818	-1	1	0.867758	1.06635	-1	1	0.8076	1.06636	-1	0
YLR448W_evolved2	YLR448W	0.707362	NA	-1	NA	0.79094	0.882272	-1	0	0.750819	0.419143	-1	-1	0.665709	NA	-1	NA	0.935283	1.16425	-1	1	0.873371	1.06907	-1	1	0.801734	0.960519	-1	1	0.842912	1.09476	-1	1	0.837117	0.71615	0	0	0.651794	0.748777	-1	0	0.867758	1.08097	-1	1	0.8076	0.860851	-1	0
YML112W_evolved3	YML112W	0.330788	0.404356	-1	1	0.550069	0.509405	-1	0	0.0894091	0.0446114	-1	-1	0.171423	0.115131	-1	0	0.666386	0.790324	-1	1	0.738852	0.860131	-1	1	0.691588	0.767293	-1	1	0.461721	0.541605	-1	0	0.296647	0.397096	-1	1	0.381198	0.375336	-1	0	0.517069	0.753911	-1	1	0.661036	0.700501	-1	0
YML112W_evolved4	YML112W	0.330788	0.630874	-1	1	0.550069	0.680467	-1	1	0.0894091	0.039548	-1	-1	0.171423	0.2982	-1	1	0.666386	0.904513	-1	1	0.738852	0.964478	-1	1	0.691588	0.814273	-1	1	0.461721	0.661063	-1	1	0.296647	0.561043	-1	1	0.381198	0.508835	-1	1	0.517069	0.886662	-1	1	0.661036	0.806813	-1	0
YMR089C_evolved1	YMR089C	0.388198	0.362412	-1	0	0.599234	0.402596	-1	-1	0.912042	0.809858	0	-1	0.826391	0.866077	-1	0	NA	NA	NA	NA	NA	NA	NA	NA	0.697803	0.752187	-1	0	0.577637	0.733089	-1	1	0.0419597	0.0380716	-1	0	0.750561	0.889494	-1	1	NA	NA	NA	NA	NA	NA	NA	NA
YMR089C_evolved2	YMR089C	0.388198	0.341233	-1	0	0.599234	0.590623	-1	0	0.912042	0.779653	0	0	0.826391	0.593926	-1	-1	NA	NA	NA	NA	NA	NA	NA	NA	0.697803	0.667536	-1	0	0.577637	0.546663	-1	0	0.0419597	NA	-1	NA	0.750561	0.768258	-1	0	NA	NA	NA	NA	NA	NA	NA	NA
YMR089C_evolved3	YMR089C	0.388198	0.450236	-1	0	0.599234	0.521504	-1	0	0.912042	1.09723	0	0	0.826391	0.917731	-1	1	NA	NA	NA	NA	NA	NA	NA	NA	0.697803	0.735604	-1	0	0.577637	0.708583	-1	1	0.0419597	0.0375258	-1	0	0.750561	0.869352	-1	1	NA	NA	NA	NA	NA	NA	NA	NA
YMR224C_evolved1	YMR224C	0.813346	0.618233	-1	0	1.02464	0.831781	0	-1	0.62828	0.574032	-1	0	0.803904	0.40269	-1	-1	0.900404	0.99182	-1	1	0.83076	0.964981	-1	1	0.832303	0.905734	-1	1	0.837536	0.881812	-1	0	0.556155	0.981793	-1	1	0.872208	0.79337	-1	-1	0.634278	1.16654	-1	1	0.949617	0.972594	-1	0
YMR224C_evolved3	YMR224C	0.813346	0.849477	-1	0	1.02464	0.907716	0	-1	0.62828	0.70584	-1	1	0.803904	0.800186	-1	0	0.900404	0.987946	-1	1	0.83076	0.865445	-1	1	0.832303	0.892169	-1	1	0.837536	0.948149	-1	1	0.556155	0.705214	-1	1	0.872208	0.876527	-1	0	0.634278	0.974669	-1	1	0.949617	0.946047	-1	0
YMR224C_evolved4	YMR224C	0.813346	0.758058	-1	0	1.02464	0.885221	0	-1	0.62828	0.569279	-1	-1	0.803904	0.39738	-1	-1	0.900404	0.988475	-1	1	0.83076	0.977819	-1	1	0.832303	0.950909	-1	1	0.837536	1.01418	-1	1	0.556155	0.934857	-1	1	0.872208	0.921594	-1	1	0.634278	1.13089	-1	1	0.949617	0.988342	-1	0
YNL005C_evolved1	YNL005C	0.406144	0.795212	-1	1	0.624542	0.665509	-1	0	0.813928	0.412663	-1	-1	0.978301	0.910141	0	0	NA	NA	NA	NA	NA	NA	NA	NA	0.667605	0.845804	-1	1	0.588335	0.778818	-1	1	NA	NA	NA	NA	0.806951	0.476447	-1	-1	NA	NA	NA	NA	NA	NA	NA	NA
YNL005C_evolved2	YNL005C	0.406144	0.722487	-1	1	0.624542	0.637786	-1	0	0.813928	0.378929	-1	-1	0.978301	0.918036	0	0	NA	NA	NA	NA	NA	NA	NA	NA	0.667605	0.819972	-1	1	0.588335	0.795364	-1	1	NA	NA	NA	NA	0.806951	0.39889	-1	-1	NA	NA	NA	NA	NA	NA	NA	NA
YNL005C_evolved3	YNL005C	0.406144	0.396285	-1	0	0.624542	0.564564	-1	0	0.813928	0.717937	-1	-1	0.978301	0.823589	0	0	NA	NA	NA	NA	NA	NA	NA	NA	0.667605	0.797224	-1	1	0.588335	0.631033	-1	1	NA	NA	NA	NA	0.806951	0.889408	-1	0	NA	NA	NA	NA	NA	NA	NA	NA
YNL069C_evolved1	YNL069C	0.519292	1.05666	-1	1	0.864858	1.12354	-1	1	0.428914	1.11543	-1	1	0.654829	1.10206	-1	1	1.05098	1.03767	0	0	0.943751	0.995975	-1	1	0.80043	0.979323	-1	1	0.92451	1.06233	-1	1	0.868839	1.08852	0	1	0.699258	0.800037	-1	1	0.794981	0.971663	-1	1	0.928619	1.00837	-1	0
YNL215W_evolved1	YNL215W	0.517998	0.364231	-1	0	0.824456	0.644738	-1	0	0.818856	0.539554	-1	-1	0.184101	0.104773	-1	0	0.965871	1.07581	-1	1	0.941881	1.0665	-1	1	0.849134	0.875129	-1	0	0.971163	1.07349	-1	1	0.99659	1.21649	0	1	0.817398	0.832783	-1	0	1.02008	1.19559	0	1	0.956736	1.04111	-1	1
YNL215W_evolved4	YNL215W	0.517998	0.316768	-1	0	0.824456	0.476187	-1	-1	0.818856	0.522732	-1	-1	0.184101	0.045107	-1	0	0.965871	1.1067	-1	1	0.941881	1.13809	-1	1	0.849134	0.945814	-1	1	0.971163	1.13591	-1	1	0.99659	1.14235	0	1	0.817398	0.843247	-1	0	1.02008	1.08745	0	0	0.956736	1.06932	-1	1
YNL225C_evolved1	YNL225C	0.137032	0.715983	-1	1	0.467848	0.95261	-1	1	0.0796604	0.0614218	-1	0	0.574135	0.240948	-1	-1	NA	NA	NA	NA	NA	NA	NA	NA	0.471876	1.01661	-1	1	0.337315	0.956561	-1	1	NA	NA	NA	NA	0.160015	0.801687	-1	1	NA	NA	NA	NA	1.14328	0.831489	0	0
YNL284C_evolved1	YNL284C	0.396767	1.13428	-1	1	0.625585	0.733624	-1	1	0.924229	0.0907695	0	-1	1.01515	0.787409	0	-1	NA	NA	NA	NA	NA	NA	NA	NA	0.684094	0.811492	-1	1	0.608654	0.939655	-1	1	0.0397835	0.781899	0	0	0.956913	0.68699	-1	-1	NA	NA	NA	NA	0.896308	1.00557	-1	0
YNL284C_evolved2	YNL284C	0.396767	0.387155	-1	0	0.625585	0.662988	-1	1	0.924229	0.865409	0	0	1.01515	1.00313	0	0	NA	NA	NA	NA	NA	NA	NA	NA	0.684094	0.672071	-1	0	0.608654	0.661049	-1	1	0.0397835	NA	0	NA	0.956913	1.01589	-1	0	NA	NA	NA	NA	0.896308	1.07087	-1	0
YNL315C_evolved1	YNL315C	0.316988	1.18224	-1	1	0.489703	0.75741	-1	1	0.740155	0.834978	-1	0	0.830152	0.915062	-1	1	0.0518803	1.026	-1	1	0.0354167	1.0467	-1	1	0.622831	0.987877	-1	1	0.508932	1.12222	-1	1	0.0475801	0.849432	-1	1	0.737225	1.0059	-1	1	NA	NA	NA	NA	0.902655	0.989773	0	0
YNL315C_evolved2	YNL315C	0.316988	1.28679	-1	1	0.489703	0.854972	-1	1	0.740155	0.859194	-1	0	0.830152	0.855092	-1	0	0.0518803	1.10034	-1	1	0.0354167	1.07164	-1	1	0.622831	0.991654	-1	1	0.508932	1.17804	-1	1	0.0475801	1.00745	-1	1	0.737225	0.988394	-1	1	NA	NA	NA	NA	0.902655	1.10939	0	0
YNR036C_evolved3	YNR036C	0.429204	0.369289	-1	0	0.646139	0.487207	-1	-1	0.847126	0.905392	-1	0	0.888447	0.747256	-1	-1	0.794165	NA	-1	NA	0.88078	NA	-1	NA	0.799875	0.648177	-1	0	0.685699	0.70403	-1	0	NA	NA	NA	NA	0.803646	0.801174	-1	0	0.932016	NA	0	NA	0.818223	NA	-1	NA
YNR052C_evolved2	YNR052C	0.295526	1.29644	-1	1	0.557304	0.786035	-1	1	0.047383	0.538707	-1	1	0.199092	0.796236	-1	1	0.827967	1.08775	-1	1	0.745731	1.07449	-1	1	0.699954	0.95989	-1	1	0.61928	1.04228	-1	1	0.258016	0.94925	-1	1	0.57264	0.958307	-1	1	0.935658	0.950183	0	0	0.869346	1.08844	-1	0
YNR052C_evolved1	YNR052C	0.295526	0.712409	-1	1	0.557304	1.10059	-1	1	0.047383	0.0757485	-1	1	0.199092	0.68925	-1	1	0.827967	0.971315	-1	1	0.745731	0.857752	-1	1	0.699954	0.887688	-1	1	0.61928	0.725538	-1	0	0.258016	0.519456	-1	1	0.57264	0.853203	-1	1	0.935658	0.905867	0	0	0.869346	0.937815	-1	0
YOL004W_evolved3	YOL004W	0.0743913	0.0495907	-1	0	0.858612	1.14336	-1	1	0.268797	0.0916558	-1	-1	NA	NA	NA	NA	0.466224	0.659663	-1	1	0.624146	0.858278	-1	1	0.719729	0.873112	-1	1	0.539266	0.740972	-1	1	0.384275	0.56926	-1	1	0.511067	0.409396	-1	-1	0.874048	1.04717	-1	1	0.630857	0.819459	-1	1
YOL004W_evolved4	YOL004W	0.0743913	NA	-1	NA	0.858612	1.20464	-1	1	0.268797	0.0928412	-1	-1	NA	NA	NA	NA	0.466224	0.678988	-1	1	0.624146	0.910063	-1	1	0.719729	0.901531	-1	1	0.539266	0.809522	-1	1	0.384275	0.594359	-1	1	0.511067	0.465151	-1	0	0.874048	1.00143	-1	1	0.630857	0.814591	-1	1
YOL023W_evolved2	YOL023W	0.443297	0.620806	-1	1	0.678037	0.795105	-1	0	0.882564	0.745941	-1	-1	0.967182	1.04697	0	0	0.451912	0.614421	-1	1	0.597016	0.696877	-1	1	0.838766	0.90565	-1	1	0.859515	1.00893	-1	1	0.370431	0.535633	-1	1	0.856374	0.866998	-1	0	0.403835	0.617914	-1	1	0.44635	0.567952	-1	1
YOL023W_evolved1	YOL023W	0.443297	0.471861	-1	0	0.678037	0.392428	-1	-1	0.882564	0.836468	-1	0	0.967182	1.13512	0	1	0.451912	0.625285	-1	1	0.597016	0.672638	-1	1	0.838766	0.808752	-1	0	0.859515	0.905514	-1	0	0.370431	0.47492	-1	1	0.856374	0.836045	-1	0	0.403835	0.528497	-1	1	0.44635	0.563218	-1	1
YOL023W_evolved3	YOL023W	0.443297	0.516032	-1	1	0.678037	0.47535	-1	-1	0.882564	0.882355	-1	0	0.967182	0.968159	0	0	0.451912	0.605131	-1	1	0.597016	0.668728	-1	1	0.838766	0.864568	-1	0	0.859515	0.926873	-1	1	0.370431	0.491334	-1	1	0.856374	0.833515	-1	0	0.403835	0.576387	-1	1	0.44635	0.566124	-1	1
YOL023W_evolved4	YOL023W	0.443297	0.444021	-1	0	0.678037	0.492753	-1	-1	0.882564	0.747736	-1	-1	0.967182	0.90765	0	0	0.451912	0.630359	-1	1	0.597016	0.689002	-1	1	0.838766	0.831248	-1	0	0.859515	0.890229	-1	0	0.370431	0.490202	-1	1	0.856374	0.780226	-1	-1	0.403835	0.626304	-1	1	0.44635	0.484775	-1	0
YOL076W_evolved1	YOL076W	0.262062	0.153384	-1	0	0.741186	0.947342	-1	1	0.0492402	0.0763186	-1	0	0.190981	0.0746346	-1	-1	0.622769	0.755323	-1	1	0.668609	0.805012	-1	1	0.628605	0.804564	-1	1	0.633963	0.714714	-1	1	0.553677	0.626156	-1	1	0.365962	0.396845	-1	0	0.714936	0.962776	-1	1	0.839926	0.911368	-1	1
YOL076W_evolved3	YOL076W	0.262062	0.162126	-1	0	0.741186	0.708881	-1	0	0.0492402	0.0382948	-1	0	0.190981	0.457956	-1	1	0.622769	0.853724	-1	1	0.668609	0.858196	-1	1	0.628605	0.701976	-1	1	0.633963	0.688543	-1	1	0.553677	0.769533	-1	1	0.365962	0.478507	-1	1	0.714936	0.877118	-1	1	0.839926	0.911244	-1	1
YOL096C_evolved1	YOL096C	0.375787	1.10762	-1	1	0.61151	0.746681	-1	1	1.06584	0.714957	0	-1	0.865539	0.930431	-1	0	NA	NA	NA	NA	NA	NA	NA	NA	0.733601	0.977112	-1	1	0.67411	1.12785	-1	1	NA	NA	NA	NA	0.812673	0.928999	-1	1	NA	NA	NA	NA	0.0316579	1.01572	-1	0
YOR026W_evolved2	YOR026W	0.65753	0.854158	-1	1	0.12224	0.297089	-1	1	0.586434	0.593106	-1	0	0.448085	0.395372	-1	0	0.531077	0.936946	-1	1	0.578407	0.913466	-1	1	0.625175	0.896426	-1	1	0.351969	0.633636	-1	1	0.235806	0.625003	-1	1	0.78935	0.712375	-1	-1	0.385716	0.711073	-1	1	0.52339	0.71643	-1	0
YOR026W_evolved3	YOR026W	0.65753	0.844063	-1	1	0.12224	0.346006	-1	1	0.586434	0.652383	-1	0	0.448085	0.573492	-1	1	0.531077	0.853307	-1	1	0.578407	0.859765	-1	1	0.625175	0.813599	-1	1	0.351969	0.582834	-1	1	0.235806	0.497741	-1	1	0.78935	0.718508	-1	-1	0.385716	0.613286	-1	1	0.52339	0.83084	-1	0
YOR096W_evolved2	YOR096W	0.475703	0.700632	-1	1	0.820781	0.70096	-1	-1	0.574665	0.44113	-1	-1	0.364291	0.29931	-1	0	0.832923	0.572281	-1	-1	0.767185	0.612045	-1	-1	0.816731	0.908618	-1	1	0.605324	0.50656	-1	0	0.820205	0.491554	0	0	0.587209	0.613821	-1	0	0.866684	0.636005	-1	0	0.815746	0.598593	-1	0
YOR182C_evolved2	YOR182C	0.944435	0.886783	-1	0	1.00437	1.07101	0	1	1.16563	0.95028	1	-1	0.786837	0.641457	-1	0	0.899603	1.03811	-1	1	0.915305	1.03689	-1	1	0.969366	0.943857	-1	0	0.962178	1.06196	-1	1	0.607304	1.17589	-1	1	1.00754	0.836392	0	-1	0.824035	1.13383	-1	1	0.938627	1.04438	-1	1
YOR182C_evolved3	YOR182C	0.944435	0.773142	-1	0	1.00437	1.07486	0	1	1.16563	0.944838	1	-1	0.786837	0.701001	-1	0	0.899603	0.906593	-1	0	0.915305	0.900404	-1	0	0.969366	0.917584	-1	0	0.962178	0.94159	-1	0	0.607304	0.934945	-1	1	1.00754	1.01315	0	0	0.824035	0.969796	-1	1	0.938627	0.919801	-1	0
YOR182C_evolved4	YOR182C	0.944435	0.86975	-1	0	1.00437	1.0683	0	1	1.16563	1.01938	1	-1	0.786837	1.08706	-1	0	0.899603	1.00353	-1	1	0.915305	0.978061	-1	1	0.969366	0.95935	-1	0	0.962178	1.12107	-1	1	0.607304	1.05654	-1	1	1.00754	0.90796	0	-1	0.824035	1.02439	-1	1	0.938627	0.93155	-1	0
YOR183W_evolved3	YOR183W	0.897113	0.839158	-1	0	0.974767	0.999395	0	0	1.07693	0.970754	1	-1	0.857033	0.670491	-1	0	0.944475	0.967557	-1	1	0.881955	0.916594	-1	0	0.987996	1.00362	0	0	1.04648	1.12873	0	1	0.940355	1.04791	0	1	1.00648	0.999893	0	0	1.05651	1.09421	0	1	0.965479	0.996216	-1	0
YOR183W_evolved4	YOR183W	0.897113	0.79333	-1	0	0.974767	0.92404	0	-1	1.07693	0.834498	1	-1	0.857033	0.475577	-1	-1	0.944475	0.964648	-1	1	0.881955	0.938903	-1	0	0.987996	0.957377	0	0	1.04648	0.99691	0	0	0.940355	1.09579	0	1	1.00648	0.807009	0	-1	1.05651	1.1414	0	1	0.965479	0.975128	-1	0
YPL024W_evolved2	YPL024W	0.876427	1.01839	-1	1	0.889148	0.999183	-1	1	0.967232	1.0773	0	1	0.886877	1.06041	-1	1	0.793336	0.953493	-1	1	0.783571	0.926491	-1	1	0.87389	0.919983	-1	1	0.663975	0.843186	-1	1	0.75154	1.07957	-1	1	0.88518	0.657671	-1	-1	0.817856	1.06879	-1	1	0.883829	0.949521	-1	1
YPL042C_evolved3	YPL042C	0.623306	0.682634	-1	0	0.368355	0.432754	-1	0	0.375892	0.3174	-1	0	0.504206	0.486834	-1	0	0.831569	0.861838	-1	0	0.913407	0.943532	-1	1	0.680605	0.680437	-1	0	0.606358	0.637058	-1	0	0.471981	0.559148	-1	1	0.379239	0.422913	-1	0	0.685706	0.773332	-1	1	0.738057	0.752583	-1	0
YPL045W_evolved1	YPL045W	NA	NA	NA	NA	0.796083	1.27272	-1	1	NA	NA	NA	NA	0.0731921	1.04821	-1	1	0.16153	1.05424	-1	1	0.308794	0.997572	-1	1	0.689159	1.02096	-1	1	0.0716788	0.470634	-1	1	0.0679024	0.995434	-1	1	NA	NA	NA	NA	NA	NA	NA	NA	0.415432	0.965221	-1	1
YPL086C_evolved2	YPL086C	0.523338	0.975744	-1	1	0.891119	1.07463	-1	1	0.180896	0.936941	-1	1	0.597565	0.996227	-1	1	0.837501	1.09753	-1	1	0.870261	0.997704	-1	1	0.746819	0.972369	-1	1	0.852614	1.15068	-1	1	0.804378	0.9806	-1	1	0.524418	0.741304	-1	1	0.914273	1.05835	0	1	0.876957	1.05359	-1	1
YPL106C_evolved3	YPL106C	0.890772	0.871563	-1	0	0.869234	1.12959	-1	1	0.967892	1.00552	-1	0	0.916782	1.02451	-1	0	0.920882	0.849714	-1	0	0.820333	0.929889	-1	1	0.893343	0.960524	-1	1	0.880378	1.10002	-1	1	0.662261	1.06711	-1	1	0.96538	1.02406	0	1	0.815905	1.1709	-1	1	0.910414	0.976588	-1	0
YPL161C_evolved1	YPL161C	0.520225	0.814567	-1	1	0.843906	1.18369	-1	1	0.493401	0.730051	-1	1	0.12519	0.790177	-1	1	0.270818	0.943589	-1	1	0.816893	1.00278	-1	1	0.826713	0.894275	-1	1	0.379464	0.636764	-1	1	0.726119	1.1152	-1	1	0.591117	0.572368	-1	0	0.759957	1.08365	-1	1	0.936303	1.03186	-1	1
YPL161C_evolved2	YPL161C	0.520225	1.14084	-1	1	0.843906	1.27076	-1	1	0.493401	0.471493	-1	0	0.12519	1.07111	-1	1	0.270818	1.08844	-1	1	0.816893	0.988498	-1	1	0.826713	1.01065	-1	1	0.379464	0.975725	-1	1	0.726119	0.964918	-1	1	0.591117	0.821546	-1	1	0.759957	1.00897	-1	1	0.936303	1.05012	-1	1
YPL161C_evolved3	YPL161C	0.520225	0.839299	-1	1	0.843906	1.12704	-1	1	0.493401	0.862728	-1	1	0.12519	0.960552	-1	1	0.270818	0.945145	-1	1	0.816893	0.924694	-1	1	0.826713	0.995183	-1	1	0.379464	0.891731	-1	1	0.726119	1.06656	-1	1	0.591117	0.799439	-1	1	0.759957	0.9413	-1	1	0.936303	1.03756	-1	1
YPL180W_evolved3	YPL180W	0.528061	0.709914	-1	1	0.811802	0.990739	-1	1	0.0497708	0.0679642	-1	0	0.74714	0.864929	-1	1	0.76191	1.01288	-1	1	0.824938	0.923107	-1	1	0.787782	0.912132	-1	1	0.532447	0.778394	-1	1	0.570575	0.869236	-1	1	0.547363	0.659001	-1	1	0.714503	0.851546	-1	0	0.868477	0.951191	-1	1
YPL271W_evolved1	YPL271W	0.260479	0.398596	-1	1	0.443528	0.511114	-1	0	0.729487	0.733274	-1	0	0.746679	0.602814	-1	0	NA	NA	NA	NA	NA	NA	NA	NA	0.459169	0.542784	-1	1	0.405495	0.478637	-1	1	NA	NA	NA	NA	0.459951	0.619699	-1	1	NA	NA	NA	NA	NA	NA	NA	NA
YPR043W_evolved4	YPR043W	0.679663	0.495608	-1	0	0.972287	1.0235	0	0	0.946385	0.827363	0	0	0.674608	0.375442	-1	-1	0.869226	0.918727	-1	0	0.816733	0.91648	-1	1	0.818986	0.879585	-1	1	0.790383	0.88599	-1	1	0.467571	0.684421	-1	1	0.778838	0.881646	-1	0	0.513407	0.798215	-1	0	0.78656	0.841868	-1	0
YPR043W_evolved2	YPR043W	0.679663	0.694773	-1	0	0.972287	1.24022	0	1	0.946385	1.0996	0	1	0.674608	0.24967	-1	-1	0.869226	1.0121	-1	1	0.816733	0.944803	-1	1	0.818986	0.963453	-1	1	0.790383	0.86633	-1	0	0.467571	0.779323	-1	0	0.778838	0.774044	-1	0	0.513407	1.03581	-1	0	0.78656	1.05269	-1	1
YPR043W_evolved3	YPR043W	0.679663	0.134574	-1	0	0.972287	1.00932	0	0	0.946385	0.548614	0	-1	0.674608	NA	-1	NA	0.869226	0.975953	-1	1	0.816733	0.960636	-1	1	0.818986	0.878559	-1	1	0.790383	0.677181	-1	0	0.467571	0.651305	-1	0	0.778838	0.527418	-1	-1	0.513407	1.02594	-1	1	0.78656	0.859969	-1	0
YPR070W_evolved3	YPR070W	0.520319	0.762628	-1	1	0.788495	0.604744	-1	-1	0.663148	0.399042	-1	-1	0.6887	0.611486	-1	-1	0.902114	0.954477	-1	1	0.934824	1.00864	-1	1	0.841685	0.888764	-1	1	0.792726	0.953607	-1	1	0.896531	1.00379	0	1	0.719902	0.620921	-1	-1	0.954706	0.974424	0	0	0.851293	0.967521	-1	1
YPR070W_evolved4	YPR070W	0.520319	0.422569	-1	0	0.788495	0.763913	-1	0	0.663148	0.59003	-1	0	0.6887	0.773966	-1	0	0.902114	0.981218	-1	1	0.934824	0.979808	-1	1	0.841685	0.906452	-1	1	0.792726	0.904326	-1	1	0.896531	0.991674	0	1	0.719902	0.647822	-1	-1	0.954706	1.08815	0	1	0.851293	0.910858	-1	1
YPR100W_evolved2	YPR100W	0.410132	1.14881	-1	1	0.600711	0.911941	-1	1	0.890247	0.817806	-1	0	0.810207	0.933094	-1	0	NA	NA	NA	NA	NA	NA	NA	NA	0.67948	0.9435	-1	1	0.578258	1.12847	-1	1	0.0365699	0.744719	-1	1	0.816378	1.01414	-1	1	NA	NA	NA	NA	0.0320635	0.967822	-1	0
YPR101W_evolved1	YPR101W	0.396804	0.154642	-1	0	0.503032	0.658683	-1	1	0.441768	0.570634	-1	1	0.267396	0.061097	-1	0	1.00758	0.88508	0	-1	0.998161	0.970323	0	0	0.806452	0.874302	-1	1	0.376047	0.512907	-1	1	0.945508	1.1096	0	1	0.504442	0.678417	-1	1	1.01041	0.973362	0	0	0.966538	0.933406	-1	0
YPR101W_evolved2	YPR101W	0.396804	0.40325	-1	0	0.503032	0.523975	-1	0	0.441768	0.737299	-1	1	0.267396	0.0844106	-1	0	1.00758	1.00785	0	0	0.998161	1.01895	0	0	0.806452	0.950865	-1	1	0.376047	0.683615	-1	1	0.945508	1.20881	0	1	0.504442	0.680098	-1	0	1.01041	1.06042	0	1	0.966538	0.976245	-1	0
YPR101W_evolved3	YPR101W	0.396804	0.222319	-1	0	0.503032	0.581674	-1	0	0.441768	0.6977	-1	1	0.267396	0.123159	-1	0	1.00758	0.963894	0	-1	0.998161	0.854341	0	-1	0.806452	0.864598	-1	1	0.376047	0.567198	-1	1	0.945508	1.06847	0	1	0.504442	0.569117	-1	0	1.01041	1.00057	0	0	0.966538	0.948853	-1	0
YPR134W_evolved2	YPR134W	0.702026	0.655674	-1	0	0.874614	0.993345	-1	1	0.857885	0.920853	-1	0	0.894018	0.760628	-1	-1	0.80748	0.960558	-1	1	0.710534	0.943797	-1	1	0.787842	0.888853	-1	1	0.771729	0.941479	-1	1	0.68299	0.938813	-1	1	0.832864	0.654623	-1	-1	0.738188	0.997271	-1	1	0.813637	1.00802	-1	1
YPR134W_evolved3	YPR134W	0.702026	1.17288	-1	1	0.874614	0.64743	-1	-1	0.857885	0.7177	-1	-1	0.894018	0.904143	-1	0	0.80748	1.05439	-1	1	0.710534	1.02873	-1	1	0.787842	0.949457	-1	1	0.771729	1.14933	-1	1	0.68299	0.809256	-1	1	0.832864	0.878892	-1	1	0.738188	0.864424	-1	1	0.813637	1.05627	-1	1
YPR134W_evolved4	YPR134W	0.702026	0.811957	-1	1	0.874614	1.10926	-1	1	0.857885	0.8648	-1	0	0.894018	0.842508	-1	0	0.80748	1.1198	-1	1	0.710534	0.987958	-1	1	0.787842	0.936784	-1	1	0.771729	1.12565	-1	1	0.68299	1.13749	-1	1	0.832864	0.653401	-1	-1	0.738188	0.963602	-1	1	0.813637	1.01261	-1	1
[truncated: 8 more columns]

## Sheet: Data-ORF
systematic gene name	Growth.rate.at.start	Growth.rate.at.end.mean	Growth.rate.at.end.max	is.compensated.at.end.in.any.line	Environmental.pleiotropy	Network.pleiotropy	Multifunctionality	GO.process.terms
YBL099W	0.693507	0.979897	1.11165	1	2	20	5	GO_P_generation_of_precursor_metabolites_and_energy | GO_P_heterocycle_metabolic_process | GO_P_transport
YBR026C	0.709649	0.97361	1.1599	1	2	4	NA	GO_P_cellular_respiration | GO_P_generation_of_precursor_metabolites_and_energy | GO_P_cellular_lipid_metabolic_process
YBR037C	0.85171	0.913696	0.942485	0	0	7	1	GO_P_transport | GO_P_response_to_stress | GO_P_protein_complex_biogenesis | GO_P_response_to_chemical_stimulus
YBR106W	0.785271	1.29835	1.41675	1	1	142	2	GO_P_transport
YBR163W	0.808826	1.06144	1.4179	1	2	NA	NA	NA
YBR173C	0.722786	1.03176	1.0401	1	4	44	2	GO_P_response_to_stress | GO_P_protein_complex_biogenesis | GO_P_cellular_protein_catabolic_process
YBR179C	0.710573	0.765963	0.825784	1	3	14	1	GO_P_mitochondrion_organization | GO_P_membrane_organization | GO_P_cellular_component_morphogenesis
YBR181C	0.857029	1.0134	1.2341	1	0	62	NA	GO_P_RNA_metabolic_process | GO_P_ribosome_biogenesis | GO_P_translation
YBR189W	0.861845	1.21829	1.30429	1	7	112	1	GO_P_RNA_metabolic_process | GO_P_ribosome_biogenesis | GO_P_translation
YBR200W	0.728254	1.00827	1.107	1	0	115	6	GO_P_response_to_chemical_stimulus | GO_P_cellular_component_morphogenesis | GO_P_conjugation
YBR221C	0.523402	0.961878	0.98471	1	0	39	1	GO_P_other
YBR267W	0.73885	1.17826	1.47686	1	9	38	2	GO_P_transport | GO_P_ribosome_biogenesis | GO_P_cell_budding | GO_P_cell_cycle
YBR282W	0.756498	0.887103	0.954893	1	5	16	NA	GO_P_mitochondrion_organization | GO_P_translation
YCR024C	0.714745	0.905741	0.993366	1	1	8	NA	GO_P_RNA_metabolic_process | GO_P_mitochondrion_organization | GO_P_translation | GO_P_cellular_amino_acid_and_derivative_metabolic_process
YCR028C	0.772081	0.885488	0.902048	1	4	6	NA	GO_P_transport | GO_P_vesicle.mediated_transport | GO_P_membrane_organization
YCR028C-A	0.718746	0.694183	0.694183	0	0	53	1	GO_P_DNA_metabolic_process | GO_P_mitochondrion_organization
YCR071C	0.752633	0.931528	1.13997	1	2	41	NA	GO_P_mitochondrion_organization | GO_P_translation
YCR094W	0.849977	0.964559	1.06462	1	2	5	NA	GO_P_transport | GO_P_other | GO_P_vesicle.mediated_transport | GO_P_membrane_organization | GO_P_cell_cycle
YDL006W	0.82806	1.06682	1.11215	1	8	29	3	GO_P_RNA_metabolic_process | GO_P_mitochondrion_organization | GO_P_response_to_stress | GO_P_protein_modification_process | GO_P_signal_transduction
YDL020C	0.873876	0.924681	0.967878	0	6	14	3	GO_P_DNA_metabolic_process | GO_P_other | GO_P_transcription | GO_P_response_to_stress | GO_P_response_to_chemical_stimulus | GO_P_cell_cycle
YDL047W	0.686363	0.847668	1.06964	1	3	105	3	GO_P_DNA_metabolic_process | GO_P_RNA_metabolic_process | GO_P_other | GO_P_response_to_stress | GO_P_response_to_chemical_stimulus | GO_P_cell_cycle | GO_P_cytoskeleton_organization | GO_P_signal_transduction | GO_P_cell_wall_organization
YDL075W	0.893006	0.806566	0.811316	0	0	80	NA	GO_P_translation
YDL081C	0.843348	0.831066	0.856988	0	3	10	1	GO_P_translation
YDL082W	0.880545	1.0971	1.19792	1	0	99	1	GO_P_translation
YDL090C	0.841798	0.89937	0.949024	0	3	7	NA	GO_P_protein_modification_process
YDL115C	0.798098	1.42805	1.74229	1	0	41	2	GO_P_RNA_metabolic_process | GO_P_transcription | GO_P_meiosis
YDL130W	0.885633	1.07406	1.11889	1	2	5	NA	GO_P_translation
YDL151C	0.6752	0.820557	0.904666	1	8	NA	NA	GO_P_RNA_metabolic_process | GO_P_transcription | GO_P_sporulation_resulting_in_formation_of_a_cellular_spore | GO_P_cellular_component_morphogenesis | GO_P_cytokinesis
YDL160C	0.776126	0.899212	0.927994	1	5	86	3	GO_P_RNA_metabolic_process | GO_P_other | GO_P_response_to_chemical_stimulus | GO_P_cellular_component_morphogenesis | GO_P_conjugation
YDL185W	0.841748	0.915102	0.918078	0	10	93	3	GO_P_DNA_metabolic_process | GO_P_other | GO_P_cellular_homeostasis
YDL192W	0.839799	0.901428	0.914333	0	1	93	4	GO_P_transport | GO_P_vesicle.mediated_transport
YDL198C	0.835569	1.31055	1.81854	1	1	9	4	GO_P_transport | GO_P_mitochondrion_organization | GO_P_cellular_homeostasis
YDR017C	0.692814	1.17684	1.70294	1	3	10	NA	GO_P_other | GO_P_response_to_chemical_stimulus | GO_P_transposition
YDR065W	0.76439	0.873844	0.956978	1	2	1	NA	GO_P_cellular_homeostasis
YDR136C	0.885952	1.00772	1.05158	1	1	NA	NA	GO_P_transport
YDR176W	0.877084	0.936501	0.989054	0	3	157	2	GO_P_chromosome_organization | GO_P_response_to_chemical_stimulus | GO_P_protein_modification_process
YDR204W	0.847394	1.34327	1.71985	1	2	4	NA	GO_P_cofactor_metabolic_process
YDR207C	0.838315	0.881743	0.914274	0	5	53	1	GO_P_DNA_metabolic_process | GO_P_RNA_metabolic_process | GO_P_transcription | GO_P_meiosis | GO_P_sporulation_resulting_in_formation_of_a_cellular_spore | GO_P_chromosome_organization | GO_P_response_to_chemical_stimulus | GO_P_protein_modification_process | GO_P_cell_cycle
YDR226W	0.798465	0.918243	1.01146	1	7	16	2	GO_P_heterocycle_metabolic_process | GO_P_other
YDR237W	0.808695	0.905478	0.922749	1	2	41	NA	GO_P_mitochondrion_organization | GO_P_translation
YDR241W	0.863692	1.01299	1.09757	1	0	NA	NA	GO_P_cellular_component_morphogenesis | GO_P_cytokinesis
YDR322W	0.86936	0.919072	0.94929	0	2	51	NA	GO_P_mitochondrion_organization | GO_P_translation
YDR363W	0.867073	1.00191	1.0775	1	0	3	NA	GO_P_DNA_metabolic_process | GO_P_RNA_metabolic_process | GO_P_transcription | GO_P_response_to_stress | GO_P_cell_cycle | GO_P_signal_transduction
YDR369C	0.804529	0.883615	0.915899	1	3	44	2	GO_P_DNA_metabolic_process | GO_P_response_to_stress | GO_P_meiosis | GO_P_sporulation_resulting_in_formation_of_a_cellular_spore | GO_P_chromosome_organization | GO_P_cell_cycle
YDR375C	0.886248	0.938896	0.959314	0	2	4	1	GO_P_cellular_respiration | GO_P_generation_of_precursor_metabolites_and_energy | GO_P_mitochondrion_organization | GO_P_protein_complex_biogenesis
YDR382W	0.712533	0.832587	1.04125	1	0	69	NA	GO_P_translation
YDR432W	0.5793	0.845739	0.953858	1	3	134	NA	GO_P_RNA_metabolic_process | GO_P_transport | GO_P_transcription | GO_P_pseudohyphal_growth
YDR450W	0.888301	1.01694	1.03236	0	0	43	NA	GO_P_RNA_metabolic_process | GO_P_transport | GO_P_ribosome_biogenesis | GO_P_translation
YDR484W	0.870314	1.03437	1.05428	1	6	35	NA	GO_P_transport | GO_P_other | GO_P_vesicle.mediated_transport
YDR507C	0.873449	0.923881	0.923881	0	0	58	3	GO_P_protein_complex_biogenesis | GO_P_protein_modification_process | GO_P_cell_budding | GO_P_cell_cycle | GO_P_cytoskeleton_organization | GO_P_cytokinesis
YEL027W	0.763026	0.805974	0.814105	0	11	22	3	GO_P_transport | GO_P_vesicle.mediated_transport | GO_P_membrane_organization | GO_P_vacuole_organization | GO_P_cellular_homeostasis
YEL044W	0.870223	0.889601	0.969261	0	6	9	NA	NA
YEL051W	0.781169	0.815986	0.850696	0	8	67	3	GO_P_cellular_homeostasis
YER014C-A	0.797326	0.856943	0.905941	0	0	NA	1	GO_P_cellular_component_morphogenesis | GO_P_cytokinesis
YER014W	0.737916	1.21943	1.21943	1	NA	1	NA	GO_P_heterocycle_metabolic_process | GO_P_cofactor_metabolic_process
YER016W	0.853239	1.09323	1.21118	1	NA	59	5	GO_P_transport | GO_P_chromosome_organization | GO_P_cell_cycle | GO_P_cytoskeleton_organization | GO_P_chromosome_segregation
YER017C	0.809588	0.8319	0.868951	0	0	14	2	GO_P_transport | GO_P_mitochondrion_organization | GO_P_other | GO_P_protein_complex_biogenesis
YER074W	0.837592	0.886571	0.897905	0	0	76	1	GO_P_RNA_metabolic_process | GO_P_ribosome_biogenesis | GO_P_translation
YER083C	0.847034	1.1063	1.254	1	7	5	4	GO_P_transport | GO_P_other | GO_P_vesicle.mediated_transport | GO_P_membrane_organization | GO_P_cell_wall_organization
YER087W	0.723188	0.854413	0.939152	1	0	NA	NA	NA
YFL023W	0.895329	0.89482	0.915298	0	7	39	1	GO_P_cellular_component_morphogenesis | GO_P_cytokinesis | GO_P_transposition
YFR001W	0.66149	0.921452	0.973829	1	7	81	1	GO_P_RNA_metabolic_process | GO_P_ribosome_biogenesis | GO_P_other
YGL020C	0.885592	1.03673	1.10125	1	0	5	5	GO_P_transport | GO_P_mitochondrion_organization | GO_P_other | GO_P_vesicle.mediated_transport | GO_P_response_to_stress | GO_P_membrane_organization | GO_P_response_to_chemical_stimulus | GO_P_cellular_homeostasis
YGL070C	0.529599	0.921505	1.10842	1	6	101	2	GO_P_DNA_metabolic_process | GO_P_RNA_metabolic_process | GO_P_transcription | GO_P_response_to_stress | GO_P_response_to_chemical_stimulus
YGL076C	0.855401	0.971602	1.03705	1	0	116	1	GO_P_translation
YGL095C	0.640807	0.544712	0.544712	0	4	23	5	GO_P_transport | GO_P_vesicle.mediated_transport | GO_P_protein_complex_biogenesis | GO_P_vacuole_organization
YGL105W	0.828119	1.05888	1.53832	1	0	68	NA	GO_P_RNA_metabolic_process | GO_P_translation | GO_P_other | GO_P_cellular_amino_acid_and_derivative_metabolic_process
YGL163C	0.854008	0.900398	0.970424	1	1	22	2	GO_P_DNA_metabolic_process | GO_P_other | GO_P_response_to_stress | GO_P_chromosome_organization
YGL211W	0.839012	0.97443	1.05362	1	2	NA	NA	GO_P_RNA_metabolic_process | GO_P_response_to_chemical_stimulus | GO_P_protein_modification_process
YGL219C	0.788284	1.01953	1.05803	1	0	3	1	GO_P_mitochondrion_organization
YGL223C	0.587124	0.650017	0.88246	1	NA	38	2	GO_P_transport | GO_P_vesicle.mediated_transport
YGL240W	0.466462	0.911981	1.09232	1	13	58	3	GO_P_chromosome_organization | GO_P_cell_cycle | GO_P_cytoskeleton_organization | GO_P_chromosome_segregation | GO_P_cellular_protein_catabolic_process
YGR092W	0.787202	1.04485	1.20272	1	0	150	4	GO_P_other | GO_P_protein_modification_process | GO_P_cellular_homeostasis
YGR101W	0.747055	1.21065	1.98327	1	2	3	1	GO_P_transport | GO_P_mitochondrion_organization | GO_P_other
YGR104C	0.622977	0.97519	1.32787	1	0	206	1	GO_P_RNA_metabolic_process | GO_P_transcription | GO_P_transposition
YGR105W	0.828647	0.879968	0.898138	0	9	29	NA	GO_P_protein_complex_biogenesis
YGR159C	0.749598	0.751108	0.771975	0	14	40	NA	GO_P_RNA_metabolic_process | GO_P_ribosome_biogenesis
YGR215W	0.767987	0.889224	0.903868	1	2	36	NA	GO_P_mitochondrion_organization | GO_P_translation
YGR229C	0.896978	0.962855	0.985465	0	4	39	2	GO_P_other | GO_P_cell_cycle
YGR252W	0.786704	0.970597	0.984863	1	2	228	4	GO_P_chromosome_organization | GO_P_protein_modification_process
YGR272C	0.648324	0.666777	0.817294	1	NA	NA	NA	NA
YGR285C	0.662814	0.702478	0.72035	0	10	60	3	GO_P_translation | GO_P_protein_folding
YHL011C	0.803065	0.906355	0.929828	1	5	22	3	GO_P_heterocycle_metabolic_process | GO_P_other | GO_P_cell_wall_organization
YHR004C	0.770244	0.978501	0.992825	1	3	4	NA	GO_P_other | GO_P_membrane_organization | GO_P_nucleus_organization | GO_P_sporulation_resulting_in_formation_of_a_cellular_spore
YHR034C	0.882591	1.06311	1.13499	1	0	35	2	GO_P_RNA_metabolic_process | GO_P_ribosome_biogenesis | GO_P_other | GO_P_protein_folding
YHR041C	0.755473	0.919782	0.956233	1	4	109	3	GO_P_RNA_metabolic_process | GO_P_transcription | GO_P_response_to_chemical_stimulus
YHR059W	0.668853	1.17132	1.32524	1	5	5	NA	NA
YHR067W	0.619771	1.33217	1.49529	1	2	2	NA	GO_P_cellular_lipid_metabolic_process
YHR147C	0.812806	0.925539	1.023	1	2	16	NA	GO_P_mitochondrion_organization | GO_P_translation
YHR168W	0.797037	0.887755	0.925223	0	0	4	NA	GO_P_translation
YIL008W	0.867151	1.04779	1.40868	1	0	5	NA	GO_P_RNA_metabolic_process | GO_P_other | GO_P_response_to_stress | GO_P_response_to_chemical_stimulus | GO_P_protein_modification_process | GO_P_cell_budding
YIL040W	0.894122	0.971955	0.977656	0	0	NA	NA	GO_P_transport
YJL029C	0.880545	1.01724	1.08092	1	5	32	2	GO_P_transport | GO_P_vesicle.mediated_transport
YJL046W	0.693786	1.2756	1.73341	1	0	1	NA	GO_P_protein_modification_process
YJL047C	0.853115	0.987305	1.01879	1	0	22	NA	GO_P_DNA_metabolic_process | GO_P_RNA_metabolic_process | GO_P_response_to_stress | GO_P_cell_cycle | GO_P_cellular_protein_catabolic_process | GO_P_transposition
YJL062W-A	0.848823	1.08011	1.08011	1	NA	5	NA	NA
YJL115W	0.781671	0.845319	0.86704	0	3	103	7	GO_P_RNA_metabolic_process | GO_P_transcription | GO_P_response_to_stress | GO_P_chromosome_organization | GO_P_protein_modification_process | GO_P_transposition
YJL124C	0.875291	0.942576	0.952004	0	4	159	2	GO_P_RNA_metabolic_process
YJL180C	0.538613	0.902897	1.40936	1	1	8	NA	GO_P_mitochondrion_organization | GO_P_protein_complex_biogenesis
YJL188C	0.586535	0.60654	0.649902	0	10	NA	NA	GO_P_cellular_component_morphogenesis | GO_P_cytokinesis
YJL189W	0.744785	0.609876	0.646233	0	0	6	NA	GO_P_translation
YJR032W	0.864527	0.90307	0.947952	0	1	36	1	GO_P_protein_folding | GO_P_response_to_stress
YJR090C	0.738694	1.05339	1.05339	1	8	64	1	GO_P_response_to_stress | GO_P_response_to_chemical_stimulus | GO_P_protein_modification_process | GO_P_cell_cycle | GO_P_conjugation | GO_P_cellular_protein_catabolic_process
YJR118C	0.848572	0.969986	1.01527	1	2	11	2	GO_P_mitochondrion_organization
YJR122W	0.814407	0.946903	1.11409	1	NA	7	NA	GO_P_cofactor_metabolic_process
YJR144W	0.863073	0.987577	1.19571	1	2	11	1	GO_P_DNA_metabolic_process | GO_P_mitochondrion_organization | GO_P_response_to_stress
YJR145C	0.845109	1.27899	1.42006	1	0	149	1	GO_P_translation
YKL009W	0.846759	0.901346	0.951992	0	2	71	NA	GO_P_RNA_metabolic_process | GO_P_ribosome_biogenesis
YKL016C	0.748658	0.751663	0.801459	0	0	10	6	GO_P_generation_of_precursor_metabolites_and_energy | GO_P_heterocycle_metabolic_process | GO_P_transport | GO_P_protein_complex_biogenesis
YKL057C	0.712482	0.840755	0.878282	1	2	65	NA	GO_P_transport | GO_P_ribosome_biogenesis | GO_P_other | GO_P_nucleus_organization
YKL119C	0.726909	0.872115	0.872115	1	10	9	NA	GO_P_protein_complex_biogenesis | GO_P_cellular_homeostasis
YKL204W	0.792798	0.902653	1.00515	1	NA	15	1	GO_P_translation | GO_P_response_to_chemical_stimulus
YKL212W	0.727416	0.964997	1.15645	1	13	23	NA	GO_P_cellular_lipid_metabolic_process
YKR074W	0.843455	0.927667	0.959384	1	0	1	NA	NA
YLL002W	0.729237	0.82953	0.896026	1	0	37	1	GO_P_DNA_metabolic_process | GO_P_RNA_metabolic_process | GO_P_transcription | GO_P_response_to_stress | GO_P_chromosome_organization | GO_P_protein_modification_process | GO_P_transposition
YLL027W	0.749368	0.816064	0.819756	0	3	11	NA	GO_P_transport
YLR027C	0.869782	0.960571	0.976227	0	NA	18	4	GO_P_cellular_amino_acid_and_derivative_metabolic_process
YLR062C	0.802072	0.880671	0.90631	0	0	NA	NA	GO_P_cellular_component_morphogenesis | GO_P_cytokinesis
YLR074C	0.716238	0.926408	0.966572	1	0	102	NA	GO_P_cellular_component_morphogenesis | GO_P_cytokinesis
YLR079W	0.790652	0.928964	0.985566	1	2	72	1	GO_P_cell_cycle | GO_P_transposition
YLR226W	0.597879	1.37567	1.42511	1	0	14	1	GO_P_transcription | GO_P_response_to_stress | GO_P_chromosome_organization | GO_P_protein_modification_process | GO_P_cell_cycle | GO_P_chromosome_segregation
YLR239C	0.828033	1.48069	1.96229	1	0	2	NA	GO_P_protein_modification_process
YLR312W-A	0.896814	0.950989	1.01102	0	1	29	NA	GO_P_mitochondrion_organization | GO_P_translation
YLR320W	0.679527	0.851012	0.908812	1	3	24	1	GO_P_DNA_metabolic_process | GO_P_response_to_stress | GO_P_meiosis | GO_P_chromosome_organization | GO_P_response_to_chemical_stimulus | GO_P_cell_cycle | GO_P_chromosome_segregation | GO_P_transposition
YLR322W	0.754005	0.963095	1.01918	1	2	NA	NA	GO_P_transport | GO_P_response_to_chemical_stimulus
YLR357W	0.767572	1.0318	1.05469	1	0	146	2	GO_P_DNA_metabolic_process | GO_P_RNA_metabolic_process | GO_P_other | GO_P_transcription | GO_P_response_to_stress | GO_P_chromosome_organization | GO_P_cell_cycle | GO_P_chromosome_segregation
YLR372W	0.779673	0.91549	0.943759	1	2	81	1	GO_P_transport | GO_P_vesicle.mediated_transport | GO_P_cellular_lipid_metabolic_process
YLR373C	0.857705	0.970612	1.05318	1	1	5	1	GO_P_cellular_protein_catabolic_process
YLR384C	0.87217	0.890765	0.905048	0	1	65	1	GO_P_RNA_metabolic_process | GO_P_transcription
YLR396C	0.821261	0.877449	0.881265	0	0	77	3	GO_P_transport | GO_P_vesicle.mediated_transport | GO_P_membrane_organization | GO_P_vacuole_organization
YLR403W	0.57106	0.944284	1.61002	1	7	10	1	GO_P_RNA_metabolic_process | GO_P_ribosome_biogenesis | GO_P_other | GO_P_transcription
YLR418C	0.711283	1.00029	1.3132	1	5	117	1	GO_P_DNA_metabolic_process | GO_P_RNA_metabolic_process | GO_P_transcription | GO_P_chromosome_organization | GO_P_protein_modification_process | GO_P_transposition
YLR448W	0.846569	1.12352	1.20318	1	0	92	1	GO_P_ribosome_biogenesis | GO_P_translation
YML024W	0.896431	0.763033	0.841143	0	0	34	1	GO_P_ribosome_biogenesis | GO_P_translation
YML032C	0.784699	0.897936	0.913502	1	0	67	6	GO_P_DNA_metabolic_process | GO_P_response_to_stress | GO_P_meiosis | GO_P_chromosome_organization | GO_P_cell_cycle
YML112W	0.798691	0.897618	0.943166	1	10	27	1	GO_P_RNA_metabolic_process | GO_P_translation | GO_P_transcription | GO_P_protein_modification_process
YMR077C	0.871965	0.944466	0.968962	0	9	32	3	GO_P_transport | GO_P_vesicle.mediated_transport | GO_P_membrane_organization | GO_P_vesicle_organization | GO_P_cellular_protein_catabolic_process
YMR089C	0.729247	0.867121	0.938943	1	0	13	3	GO_P_transport | GO_P_mitochondrion_organization | GO_P_other | GO_P_protein_complex_biogenesis
YMR224C	0.749791	0.887579	0.941021	1	0	70	2	GO_P_DNA_metabolic_process | GO_P_RNA_metabolic_process | GO_P_transcription | GO_P_response_to_stress | GO_P_meiosis | GO_P_sporulation_resulting_in_formation_of_a_cellular_spore | GO_P_cell_cycle
YNL005C	0.758076	0.925287	0.996981	1	0	51	NA	GO_P_mitochondrion_organization | GO_P_translation
YNL025C	0.896616	1.00542	1.0289	1	0	45	2	GO_P_RNA_metabolic_process | GO_P_transcription | GO_P_meiosis
YNL059C	0.878275	1.05222	1.38769	1	5	42	NA	GO_P_chromosome_organization
YNL069C	0.85195	0.98439	1.08126	1	0	93	NA	GO_P_translation
YNL081C	0.862165	0.86783	0.86783	0	NA	8	NA	GO_P_mitochondrion_organization | GO_P_translation | GO_P_sporulation_resulting_in_formation_of_a_cellular_spore
YNL215W	0.882517	1.03395	1.13094	1	0	23	NA	NA
YNL225C	0.562865	0.825701	1.02042	1	2	26	4	GO_P_cell_cycle | GO_P_cytoskeleton_organization
YNL248C	0.848117	0.883626	0.904511	0	2	80	1	GO_P_RNA_metabolic_process | GO_P_other | GO_P_transcription
YNL250W	0.791849	0.872956	0.892333	0	0	59	3	GO_P_DNA_metabolic_process | GO_P_other | GO_P_response_to_stress | GO_P_meiosis | GO_P_chromosome_organization | GO_P_cell_cycle
YNL252C	0.802312	0.881106	0.898754	0	0	40	NA	GO_P_mitochondrion_organization | GO_P_translation
YNL284C	0.748135	0.873437	0.889959	1	3	72	NA	GO_P_mitochondrion_organization | GO_P_translation
YNL315C	0.615881	0.982842	1.44939	1	2	13	2	GO_P_mitochondrion_organization | GO_P_protein_complex_biogenesis
YNR036C	0.889088	1.22549	1.70928	1	3	11	NA	GO_P_mitochondrion_organization | GO_P_translation
YNR052C	0.722533	1.01502	1.51591	1	9	109	NA	GO_P_RNA_metabolic_process | GO_P_transcription
YOL004W	0.826757	1.0117	1.07256	1	0	157	3	GO_P_DNA_metabolic_process | GO_P_RNA_metabolic_process | GO_P_transcription | GO_P_response_to_stress | GO_P_chromosome_organization | GO_P_protein_modification_process | GO_P_transposition
YOL006C	0.841084	0.908434	0.942437	0	0	42	1	GO_P_DNA_metabolic_process | GO_P_RNA_metabolic_process | GO_P_other | GO_P_transcription | GO_P_chromosome_organization | GO_P_cell_cycle | GO_P_chromosome_segregation
YOL023W	0.612641	1.44695	1.64201	1	2	3	NA	GO_P_mitochondrion_organization | GO_P_translation
YOL076W	0.662559	0.795316	0.882481	1	1	11	1	GO_P_mitochondrion_organization | GO_P_protein_modification_process | GO_P_cytoskeleton_organization
YOL096C	0.884707	1.08563	1.36702	1	0	5	NA	GO_P_cofactor_metabolic_process
YOR026W	0.817434	1.11969	1.38908	1	NA	28	2	GO_P_cell_cycle
YOR035C	0.869107	0.967154	1.1028	0	7	23	5	GO_P_DNA_metabolic_process | GO_P_other | GO_P_cytoskeleton_organization
YOR078W	0.84024	0.835046	0.864135	0	0	67	NA	GO_P_RNA_metabolic_process | GO_P_ribosome_biogenesis
YOR096W	0.725412	0.833709	0.928005	1	8	143	NA	GO_P_ribosome_biogenesis | GO_P_translation
YOR158W	0.870398	0.900137	0.908569	0	0	50	1	GO_P_mitochondrion_organization | GO_P_translation
YOR182C	0.883695	1.07535	1.11122	1	0	NA	NA	GO_P_translation
YOR183W	0.880865	1.02978	1.05242	1	0	NA	NA	NA
YOR211C	0.766464	0.807039	0.815312	0	2	12	1	GO_P_mitochondrion_organization | GO_P_membrane_organization | GO_P_cellular_component_morphogenesis
YOR241W	0.870776	0.960769	1.04806	1	0	1	1	GO_P_other
YOR305W	0.878267	0.90295	0.920662	0	NA	3	NA	GO_P_response_to_chemical_stimulus
YPL024W	0.832532	0.97423	1.00359	1	NA	14	2	GO_P_other | GO_P_response_to_stress | GO_P_chromosome_organization | GO_P_cell_cycle | GO_P_chromosome_segregation
YPL042C	0.876813	0.981008	0.99775	1	0	98	2	GO_P_RNA_metabolic_process | GO_P_transcription | GO_P_meiosis | GO_P_protein_modification_process
YPL045W	0.741481	1.35634	1.49114	1	11	49	2	GO_P_transport | GO_P_vesicle.mediated_transport | GO_P_membrane_organization | GO_P_vacuole_organization
YPL078C	0.859134	0.932816	0.936954	0	0	32	3	GO_P_generation_of_precursor_metabolites_and_energy | GO_P_heterocycle_metabolic_process | GO_P_transport
YPL086C	0.829123	0.965359	1.10899	1	2	62	1	GO_P_RNA_metabolic_process | GO_P_transcription
YPL097W	0.875838	0.90705	0.951838	0	1	NA	NA	GO_P_RNA_metabolic_process | GO_P_translation | GO_P_cellular_amino_acid_and_derivative_metabolic_process
YPL101W	0.856642	0.880972	0.902789	0	0	37	1	GO_P_RNA_metabolic_process | GO_P_transcription
YPL106C	0.741961	0.792748	0.904817	1	0	176	1	GO_P_protein_folding
YPL161C	0.819871	0.97128	1.00058	1	0	28	3	GO_P_cytoskeleton_organization | GO_P_cellular_component_morphogenesis | GO_P_signal_transduction | GO_P_transposition
YPL180W	0.871692	0.985055	1.00202	1	3	8	1	GO_P_other | GO_P_response_to_stress | GO_P_cellular_carbohydrate_metabolic_process | GO_P_signal_transduction | GO_P_cell_wall_organization
YPL271W	0.379177	0.79975	0.831638	1	0	4	2	GO_P_generation_of_precursor_metabolites_and_energy | GO_P_heterocycle_metabolic_process | GO_P_transport
YPR036W	0.853444	0.930717	0.931909	0	8	45	3	GO_P_cellular_homeostasis
YPR043W	0.585903	0.940532	1.18346	1	2	5	NA	GO_P_translation
YPR067W	0.778899	0.821379	0.843616	0	2	14	NA	GO_P_heterocycle_metabolic_process | GO_P_transport | GO_P_response_to_chemical_stimulus | GO_P_cofactor_metabolic_process | GO_P_vitamin_metabolic_process
YPR070W	0.896128	1.05271	1.08856	1	2	114	1	GO_P_RNA_metabolic_process | GO_P_transcription
YPR100W	0.848509	1.08169	1.38953	1	0	6	NA	GO_P_cellular_respiration | GO_P_generation_of_precursor_metabolites_and_energy | GO_P_mitochondrion_organization | GO_P_translation
YPR101W	0.603994	0.899644	0.902929	1	10	94	2	GO_P_RNA_metabolic_process
YPR134W	0.858725	1.09838	1.32808	1	2	2	1	GO_P_RNA_metabolic_process
YPR135W	0.792631	0.799892	0.84875	0	5	20	3	GO_P_DNA_metabolic_process | GO_P_other | GO_P_response_to_stress | GO_P_chromosome_organization | GO_P_cell_cycle | GO_P_chromosome_segregation
