# Supplementary material for: The Genomic Landscape of Compensatory Evolution
Source: PLoS Biol. 2014 Aug 26;12(8):e1001935. doi: 10.1371/journal.pbio.1001935 (PMC4144845; doi:10.1371/journal.pbio.1001935)
Supplement: Table S11 — Data supporting Figure S3. (S3A) Euclidean distances between pairs of wild-type, evolved, and ancestor knock-outs, after excluding genes from the transcriptome profiles that (i) show copy number changes in the evolved lines, (ii) change expression level in aneuploid lines, or (iii) whose expression level depends on cellular growth rate. (S3B) Table includes categories of expression changes for each gene in the eight evolved knockout strains, excluding genes from the transcriptome profiles that (i) show copy number changes in the evolved lines, (ii) change expression level in aneuploid lines, or (iii) whose expression level depends on cellular growth rate. Genes displaying an initial expression change in the knockout can be categorized as restored, if its expression level changes in the opposite direction during evolution, or unrestored. The category “other” includes genes that did not display an initial expression change. (XLSX) [file pbio.1001935.s016.xlsx]

## Sheet: data_for_figure_S3A
Strain A	Strain B	Euclidean distance
Bud20_anc	Bud20_evolved2	4.92235
WT	Bud20_anc	8.6747
WT	Bud20_evolved2	7.13594
Ifm1_anc	Ifm1_evolved1	13.4364
WT	Ifm1_anc	10.7314
WT	Ifm1_evolved1	14.3942
Mdm34_anc	Mdm34_evolved1	8.59997
WT	Mdm34_anc	9.53406
WT	Mdm34_evolved1	4.70511
Pop2_anc	Pop2_evolved1	10.8501
WT	Pop2_anc	22.6216
WT	Pop2_evolved1	15.2299
Rpb9_anc	Rpb9_evolved2	6.87597
WT	Rpb9_anc	11.7089
WT	Rpb9_evolved2	12.4279
Rpl43a_anc	Rpl43a_evolved1	13.6278
WT	Rpl43a_anc	6.72023
WT	Rpl43a_evolved1	14.0215
Rsc2_anc	Rsc2_evolved1	6.91223
WT	Rsc2_anc	12.4518
WT	Rsc2_evolved1	9.31342
Srb5_anc	Srb5_evolved1	18.45
WT	Srb5_anc	15.196
WT	Srb5_evolved1	18.4158

## Sheet: data_for_figure_S3B
ORF	gene name	Bud20	Ifm1	Mdm34	Pop2	Rpb9	Rpl43a	Rsc2	Srb5
Q0010	Q0010	other	other	other	other	other	other	other	other
Q0017	Q0017	other	other	other	other	other	other	other	other
Q0032	Q0032	other	other	other	other	other	other	other	other
Q0045	COX1	other	other	other	other	other	other	other	other
Q0060	AI3	other	unrestored	other	other	other	other	other	other
Q0085	ATP6	other	other	other	other	other	other	other	other
Q0092	Q0092	other	other	other	other	other	other	other	other
Q0105	COB	other	other	other	other	other	other	other	other
Q0110	BI2	other	other	other	other	other	other	other	other
Q0115	BI3	other	other	other	other	other	other	other	other
Q0120	BI4	other	other	other	other	other	other	other	other
Q0142	Q0142	other	other	other	other	other	other	other	other
Q0143	Q0143	other	other	other	other	other	other	other	other
Q0144	Q0144	other	other	other	other	other	other	other	other
Q0250	COX2	other	other	other	other	other	other	other	other
Q0255	Q0255	other	other	other	other	other	other	other	other
Q0275	COX3	other	other	other	other	other	other	other	other
Q0297	Q0297	other	other	other	other	other	other	other	other
snR10	SNR10	other	other	other	other	other	other	other	other
YAL001C	TFC3	other	other	other	other	other	other	other	NA
YAL002W	VPS8	other	other	other	other	other	other	other	NA
YAL003W	EFB1	other	other	other	other	other	other	other	NA
YAL004W	YAL004W	other	other	other	other	other	other	other	NA
YAL008W	FUN14	other	other	other	other	other	other	other	NA
YAL009W	SPO7	other	other	other	other	other	other	other	NA
YAL010C	MDM10	other	other	other	other	other	other	other	NA
YAL011W	SWC3	other	other	other	other	other	other	other	NA
YAL012W	CYS3	other	other	other	other	other	other	other	NA
YAL013W	DEP1	other	other	other	other	other	other	other	NA
YAL014C	SYN8	other	other	other	other	other	other	other	NA
YAL015C	NTG1	other	other	other	other	other	other	other	NA
YAL016W	TPD3	other	other	other	other	other	other	other	NA
YAL018C	YAL018C	other	other	other	other	other	other	other	NA
YAL019W	FUN30	other	other	other	other	other	other	other	NA
YAL020C	ATS1	other	other	other	other	other	other	other	NA
YAL021C	CCR4	other	other	other	other	other	other	other	NA
YAL022C	FUN26	other	other	other	other	other	other	other	NA
YAL024C	LTE1	other	other	other	other	other	other	other	NA
YAL025C	MAK16	other	other	other	other	other	other	other	NA
YAL026C	DRS2	other	other	other	other	other	other	other	NA
YAL027W	SAW1	other	other	other	other	other	other	unrestored	NA
YAL028W	FRT2	other	other	other	other	other	NA	other	NA
YAL029C	MYO4	other	other	other	other	other	other	other	NA
YAL030W	SNC1	other	other	other	other	other	other	other	NA
YAL031C	GIP4	other	other	other	other	other	other	other	NA
YAL032C	PRP45	other	other	other	other	other	other	other	NA
YAL034C-B	YAL034C-B	other	other	other	other	other	other	other	NA
YAL034W-A	MTW1	other	other	other	other	other	other	other	NA
YAL035W	FUN12	other	other	other	other	other	other	other	NA
YAL037W	YAL037W	other	other	other	other	other	other	other	NA
YAL038W	CDC19	other	other	other	other	other	other	other	NA
YAL039C	CYC3	other	other	other	unrestored	other	other	other	NA
YAL040C	CLN3	other	other	other	other	other	NA	other	NA
YAL041W	CDC24	other	other	other	other	other	other	other	NA
YAL042C-A	YAL042C-A	other	other	other	other	other	other	other	NA
YAL042W	ERV46	other	other	other	other	other	other	other	NA
YAL043C	PTA1	other	other	other	other	other	other	other	NA
YAL044C	GCV3	unrestored	other	other	other	other	other	other	NA
YAL044W-A	YAL044W-A	other	other	other	other	other	other	other	NA
YAL045C	YAL045C	other	other	other	other	other	other	other	NA
YAL046C	AIM1	other	other	other	other	other	other	other	NA
YAL047C	SPC72	other	other	other	other	other	other	other	NA
YAL048C	GEM1	other	other	other	other	other	other	other	NA
YAL049C	AIM2	other	other	other	other	other	other	other	NA
YAL051W	OAF1	other	other	other	other	other	other	other	NA
YAL053W	FLC2	other	other	other	other	other	other	other	NA
YAL054C	ACS1	other	other	other	other	other	other	other	NA
YAL055W	PEX22	other	other	other	other	other	other	other	NA
YAL056C-A	YAL056C-A	other	other	other	other	other	other	other	NA
YAL058W	CNE1	other	other	other	other	other	other	other	NA
YAL060W	BDH1	other	other	other	other	other	other	other	NA
YAL063C	FLO9	other	other	other	other	other	NA	other	NA
YAL064C-A	TDA8	other	other	other	other	other	other	other	NA
YAL064W	YAL064W	other	other	other	other	other	other	other	NA
YAL064W-B	YAL064W-B	other	other	other	other	other	other	other	NA
YAL065C	YAL065C	other	other	other	other	other	other	other	NA
YAL066W	YAL066W	other	other	other	other	other	other	other	NA
YAL067C	SEO1	other	other	other	other	other	NA	other	NA
YAL067W-A	YAL067W-A	other	other	other	other	other	other	other	NA
YAL068C	PAU8	other	other	other	other	other	NA	other	NA
YAL069W	YAL069W	other	other	other	other	other	other	other	NA
YAR002W	NUP60	other	other	other	other	other	other	other	NA
YAR003W	SWD1	other	other	other	other	other	other	other	NA
YAR007C	RFA1	other	other	other	other	other	other	other	NA
YAR008W	SEN34	other	other	other	other	other	other	other	NA
YAR009C	YAR009C	other	other	other	other	other	other	other	NA
YAR014C	BUD14	other	other	other	other	other	other	other	NA
YAR015W	ADE1	other	other	other	other	other	NA	unrestored	NA
YAR018C	KIN3	other	other	other	other	other	other	other	NA
YAR019C	CDC15	other	other	other	other	other	other	other	NA
YAR023C	YAR023C	other	other	other	other	other	NA	other	NA
YAR027W	UIP3	other	other	other	other	other	other	other	NA
YAR028W	YAR028W	other	other	other	other	other	other	other	NA
YAR029W	YAR029W	other	other	other	other	other	other	other	NA
YAR030C	YAR030C	other	other	other	other	other	other	other	NA
YAR031W	PRM9	other	other	other	other	other	other	other	NA
YAR033W	MST28	other	other	other	other	other	other	unrestored	NA
YAR035W	YAT1	other	other	other	other	other	other	other	NA
YAR042W	SWH1	other	other	other	other	other	other	other	NA
YAR047C	YAR047C	other	other	other	other	other	other	other	NA
YAR050W	FLO1	other	other	other	other	other	NA	other	NA
YAR053W	YAR053W	other	other	other	other	other	other	other	NA
YAR060C	YAR060C	other	other	other	other	other	other	other	NA
YAR062W	YAR062W	other	other	other	other	other	NA	other	NA
YAR064W	YAR064W	other	other	other	other	other	other	other	NA
YAR069C	YAR069C	other	other	other	other	other	other	other	NA
YBL001C	ECM15	other	other	other	other	other	other	other	other
YBL003C	HTA2	other	other	other	other	other	other	other	other
YBL004W	UTP20	other	other	other	other	other	other	other	other
YBL005W	PDR3	other	unrestored	other	other	other	other	other	other
YBL006C	LDB7	other	other	other	other	other	other	other	other
YBL007C	SLA1	other	other	other	other	other	other	other	other
YBL008W	HIR1	other	other	other	other	other	other	other	other
YBL009W	ALK2	other	other	other	other	other	other	other	other
YBL010C	YBL010C	other	other	other	other	other	other	other	other
YBL011W	SCT1	other	other	other	other	other	other	other	other
YBL012C	YBL012C	other	other	other	other	other	other	other	other
YBL013W	FMT1	other	other	other	other	other	other	other	other
YBL014C	RRN6	other	other	other	other	other	other	other	other
YBL015W	ACH1	other	other	other	other	other	other	other	other
YBL016W	FUS3	other	other	other	other	other	other	other	other
YBL017C	PEP1	other	other	other	other	other	other	other	other
YBL018C	POP8	other	other	other	other	other	other	other	other
YBL021C	HAP3	other	other	other	other	other	other	other	other
YBL022C	PIM1	other	other	other	other	other	other	other	other
YBL023C	MCM2	other	other	other	other	other	other	other	other
YBL024W	NCL1	other	other	other	other	other	other	other	other
YBL025W	RRN10	other	other	other	other	other	NA	other	other
YBL026W	LSM2	other	other	other	other	other	other	other	other
YBL028C	YBL028C	other	other	other	other	other	other	other	other
YBL029C-A	YBL029C-A	other	other	other	other	other	other	other	other
YBL029W	YBL029W	other	other	other	other	other	other	other	other
YBL030C	PET9	other	other	other	other	other	other	other	other
YBL031W	SHE1	other	other	other	other	other	other	other	other
YBL034C	STU1	other	other	other	other	other	other	other	other
YBL035C	POL12	other	other	other	other	other	other	other	other
YBL036C	YBL036C	other	other	other	other	other	other	other	other
YBL037W	APL3	other	other	other	other	other	other	other	other
YBL038W	MRPL16	other	other	other	unrestored	other	other	other	other
YBL040C	ERD2	other	other	other	other	other	other	other	other
YBL041W	PRE7	other	other	other	other	other	other	other	other
YBL044W	YBL044W	other	other	other	other	other	other	other	other
YBL046W	PSY4	other	other	other	other	other	other	other	other
YBL047C	EDE1	other	other	other	unrestored	other	other	other	other
YBL050W	SEC17	other	other	other	other	other	other	other	other
YBL051C	PIN4	other	other	other	other	other	other	other	other
YBL052C	SAS3	other	other	other	other	other	other	other	other
YBL053W	YBL053W	other	other	other	other	other	other	other	other
YBL054W	TOD6	other	other	other	other	other	other	other	other
YBL055C	YBL055C	other	other	other	other	other	other	other	other
YBL056W	PTC3	other	other	other	other	other	other	other	other
YBL057C	PTH2	other	other	other	other	other	other	other	other
YBL058W	SHP1	other	other	other	other	other	other	other	other
YBL059C-A	CMC2	other	other	other	other	other	other	other	other
YBL059W	YBL059W	other	other	other	other	other	other	other	other
YBL060W	YEL1	other	other	other	other	other	other	other	other
YBL061C	SKT5	other	other	other	other	other	other	other	other
YBL062W	YBL062W	other	other	other	other	other	other	other	other
YBL063W	KIP1	other	other	other	other	other	other	other	other
YBL065W	YBL065W	other	other	other	other	other	other	other	other
YBL066C	SEF1	other	other	other	other	other	NA	other	other
YBL067C	UBP13	other	other	other	other	other	other	other	other
YBL068W	PRS4	other	other	other	other	other	other	other	other
YBL069W	AST1	other	other	other	other	other	other	other	other
YBL070C	YBL070C	other	other	other	other	other	other	other	other
YBL071C	YBL071C	other	other	other	other	other	other	other	other
YBL073W	YBL073W	other	other	other	other	other	other	other	other
YBL074C	AAR2	other	other	other	other	other	other	other	other
YBL076C	ILS1	other	other	other	other	other	other	other	other
YBL077W	YBL077W	other	other	other	other	other	other	other	other
YBL079W	NUP170	other	other	other	other	other	other	other	other
YBL080C	PET112	other	other	other	unrestored	other	other	other	other
YBL082C	ALG3	other	other	other	other	other	other	other	other
YBL083C	YBL083C	other	other	other	other	other	other	other	other
YBL084C	CDC27	other	other	other	other	other	other	other	other
YBL085W	BOI1	other	other	other	other	other	other	other	other
YBL086C	YBL086C	other	other	other	other	other	other	other	other
YBL088C	TEL1	other	other	other	other	other	other	other	other
YBL089W	AVT5	other	other	other	other	other	other	other	other
YBL090W	MRP21	other	other	other	other	other	other	other	other
YBL091C	MAP2	other	other	other	other	other	other	other	other
YBL091C-A	SCS22	other	other	other	other	other	NA	other	other
YBL092W	RPL32	other	other	other	other	other	other	other	other
YBL093C	ROX3	other	other	other	other	other	other	other	other
YBL094C	YBL094C	other	other	other	other	other	NA	other	other
YBL096C	YBL096C	other	other	other	other	other	other	other	other
YBL097W	BRN1	other	other	other	other	other	other	other	other
YBL098W	BNA4	other	other	other	other	other	other	other	unrestored
YBL099W	ATP1	other	other	other	other	other	NA	other	other
YBL100C	YBL100C	other	other	other	other	other	NA	other	other
YBL101C	ECM21	other	other	other	other	other	other	other	other
YBL102W	SFT2	other	other	other	other	other	other	other	other
YBL104C	YBL104C	other	other	other	other	other	other	other	other
YBL105C	PKC1	other	other	other	other	other	other	other	other
YBL106C	SRO77	other	other	other	other	other	other	other	unrestored
YBL107C	YBL107C	other	other	other	other	other	other	other	other
YBL107W-A	YBL107W-A	other	other	other	other	unrestored	other	restored	restored
YBL108W	YBL108W	other	other	other	other	other	other	other	other
YBL109W	YBL109W	other	other	other	other	other	other	other	other
YBL112C	YBL112C	other	other	other	other	other	other	other	other
YBR002C	RER2	other	other	other	other	other	other	other	other
YBR003W	COQ1	other	other	other	other	other	other	other	other
YBR004C	GPI18	other	other	other	other	other	other	other	other
YBR005W	RCR1	other	other	other	other	other	other	other	other
YBR006W	UGA2	other	other	other	other	other	other	other	other
YBR007C	DSF2	other	other	other	other	other	other	other	other
YBR008C	FLR1	other	other	other	other	other	NA	other	other
YBR009C	HHF1	other	other	other	other	other	other	other	other
YBR010W	HHT1	other	other	other	other	other	other	other	other
YBR011C	IPP1	other	other	other	other	other	other	other	other
YBR012C	YBR012C	other	other	other	unrestored	other	other	other	restored
YBR013C	YBR013C	other	other	other	other	other	other	other	other
YBR014C	GRX7	other	other	other	other	other	other	other	other
YBR015C	MNN2	other	other	other	other	other	other	other	other
YBR016W	YBR016W	other	other	other	other	other	other	other	other
YBR017C	KAP104	other	other	other	other	other	other	other	other
YBR018C	GAL7	other	other	other	other	other	other	other	other
YBR019C	GAL10	other	other	other	other	other	other	other	other
YBR020W	GAL1	other	other	other	other	other	other	other	other
YBR023C	CHS3	other	other	other	other	other	other	other	other
YBR024W	SCO2	other	other	other	other	other	NA	other	other
YBR027C	YBR027C	other	other	other	other	other	other	other	other
YBR028C	YBR028C	other	other	other	other	other	other	other	other
YBR030W	RKM3	other	other	other	other	other	other	other	other
YBR031W	RPL4A	other	other	other	other	other	other	other	other
YBR032W	YBR032W	other	other	other	other	other	other	other	other
YBR036C	CSG2	other	other	other	other	other	other	other	other
YBR038W	CHS2	other	other	other	other	other	other	other	other
YBR039W	ATP3	other	other	other	unrestored	other	other	unrestored	unrestored
YBR040W	FIG1	other	other	other	restored	other	other	other	other
YBR041W	FAT1	other	other	other	other	other	other	other	other
YBR044C	TCM62	other	other	other	other	other	other	other	other
YBR045C	GIP1	other	other	other	other	other	other	other	other
YBR049C	REB1	other	other	other	other	other	other	other	other
YBR050C	REG2	other	other	other	other	other	other	other	other
YBR051W	YBR051W	other	other	other	other	other	NA	other	other
YBR052C	RFS1	other	other	other	other	other	NA	other	other
YBR053C	YBR053C	other	other	other	other	other	other	other	unrestored
YBR055C	PRP6	other	other	other	other	other	other	other	other
YBR057C	MUM2	other	other	other	other	other	other	other	other
YBR058C	UBP14	other	other	other	other	other	other	other	other
YBR058C-A	TSC3	other	other	other	other	other	other	other	other
YBR060C	ORC2	other	other	other	other	other	other	other	other
YBR063C	YBR063C	other	other	other	other	other	other	other	other
YBR064W	YBR064W	other	other	other	other	other	other	other	other
YBR065C	ECM2	other	other	other	other	other	other	other	other
YBR066C	NRG2	other	other	other	other	other	other	other	other
YBR067C	TIP1	other	other	other	other	unrestored	other	unrestored	restored
YBR068C	BAP2	other	other	other	unrestored	other	other	other	other
YBR069C	TAT1	other	other	other	other	other	NA	other	other
YBR070C	ALG14	other	other	other	other	other	other	other	other
YBR073W	RDH54	other	other	other	other	other	other	other	other
YBR074W	YBR074W	other	other	other	other	other	other	other	other
YBR076W	ECM8	other	other	other	other	other	other	other	other
YBR077C	SLM4	other	other	other	other	other	other	other	other
YBR078W	ECM33	other	other	other	other	other	other	other	other
YBR079C	RPG1	other	other	other	other	other	other	other	other
YBR080C	SEC18	other	other	other	other	other	other	other	other
YBR081C	SPT7	other	other	other	other	other	other	other	other
YBR083W	TEC1	other	other	other	other	other	other	other	other
YBR085C-A	YBR085C-A	other	other	other	restored	other	NA	other	other
YBR086C	IST2	other	other	other	other	other	other	other	other
YBR089C-A	NHP6B	other	other	other	other	other	other	other	other
YBR089W	YBR089W	other	other	other	other	other	other	other	other
YBR090C	YBR090C	other	other	other	other	other	other	other	other
YBR092C	PHO3	other	other	other	other	other	NA	other	other
YBR094W	PBY1	other	other	other	other	other	other	other	other
YBR095C	RXT2	other	other	other	other	other	other	other	other
YBR097W	VPS15	other	other	other	other	other	other	other	other
YBR098W	MMS4	other	other	other	other	other	NA	other	other
YBR101C	FES1	other	other	other	other	other	other	other	other
YBR102C	EXO84	other	other	other	other	other	other	other	other
YBR103C-A	YBR103C-A	other	other	other	other	other	other	other	other
YBR103W	SIF2	other	other	other	other	other	other	other	other
YBR104W	YMC2	other	other	other	other	other	other	other	unrestored
YBR105C	VID24	other	unrestored	restored	unrestored	unrestored	other	other	other
YBR106W	PHO88	other	other	other	other	other	other	other	other
YBR107C	IML3	other	other	other	other	other	other	other	other
YBR108W	AIM3	other	other	other	other	other	other	other	other
YBR109C	CMD1	other	other	other	other	other	other	other	other
YBR110W	ALG1	other	other	other	other	other	other	other	other
YBR111C	YSA1	other	other	other	other	other	other	other	other
YBR112C	CYC8	other	other	other	other	other	other	other	other
YBR113W	YBR113W	other	other	other	other	other	other	other	other
YBR114W	RAD16	other	other	other	other	other	other	other	other
YBR115C	LYS2	other	other	other	other	other	NA	other	other
YBR117C	TKL2	other	other	other	other	other	NA	other	other
YBR119W	MUD1	other	other	other	other	other	other	other	other
YBR121C	GRS1	other	other	other	other	other	other	other	other
YBR122C	MRPL36	other	other	other	unrestored	other	other	other	other
YBR123C	TFC1	other	other	other	other	other	other	other	other
YBR124W	YBR124W	other	other	other	other	other	other	other	other
YBR125C	PTC4	other	other	other	other	other	other	other	other
YBR127C	VMA2	other	other	other	other	other	other	other	other
YBR128C	ATG14	other	other	other	other	other	NA	other	other
YBR129C	OPY1	other	other	other	other	other	other	other	other
YBR131W	CCZ1	other	other	other	other	other	other	other	other
YBR133C	HSL7	other	other	other	other	other	other	other	other
YBR134W	YBR134W	other	other	other	other	other	other	other	other
YBR136W	MEC1	other	other	other	other	other	other	other	other
YBR137W	YBR137W	other	other	other	other	other	other	other	other
YBR138C	YBR138C	other	other	other	other	other	other	other	other
YBR140C	IRA1	other	other	other	other	other	other	other	other
YBR143C	SUP45	other	other	other	other	other	other	other	other
YBR144C	YBR144C	other	other	other	other	other	other	other	other
YBR145W	ADH5	other	other	restored	other	other	NA	other	other
YBR147W	RTC2	other	other	other	other	other	other	other	other
YBR148W	YSW1	other	other	other	other	other	NA	other	other
YBR150C	TBS1	other	other	other	other	other	other	other	other
YBR151W	APD1	other	other	other	other	other	other	other	other
YBR152W	SPP381	other	other	other	other	other	NA	other	other
YBR153W	RIB7	other	other	other	other	other	other	other	other
YBR155W	CNS1	other	other	other	unrestored	other	other	other	other
YBR156C	SLI15	other	other	other	other	other	other	other	other
YBR157C	ICS2	other	other	other	other	other	other	other	restored
YBR158W	AMN1	other	other	other	unrestored	other	other	other	other
YBR159W	IFA38	other	other	other	other	other	other	other	other
YBR160W	CDC28	other	other	other	other	other	other	other	other
YBR161W	CSH1	other	other	other	other	other	other	other	other
YBR162W-A	YSY6	other	other	other	other	other	other	other	other
YBR163W	DEM1	other	other	other	other	other	other	other	other
YBR164C	ARL1	other	other	other	other	other	other	other	other
YBR165W	UBS1	other	other	other	other	other	other	other	other
YBR166C	TYR1	other	other	other	other	other	other	other	other
YBR167C	POP7	other	other	other	other	other	other	other	other
YBR168W	PEX32	other	other	other	other	other	other	other	other
YBR170C	NPL4	other	other	other	other	other	other	other	other
YBR172C	SMY2	other	other	other	other	other	other	other	other
YBR173C	UMP1	other	other	other	other	other	other	other	other
YBR174C	YBR174C	other	other	other	other	other	other	other	other
YBR176W	ECM31	other	other	other	other	other	other	other	other
YBR177C	EHT1	other	other	other	other	other	other	other	other
YBR178W	YBR178W	other	other	other	other	other	other	other	other
YBR179C	FZO1	other	other	other	other	other	other	other	other
YBR180W	DTR1	other	other	other	other	other	other	other	other
YBR182C	SMP1	other	other	other	other	other	other	other	other
YBR183W	YPC1	other	other	other	unrestored	other	NA	unrestored	other
YBR184W	YBR184W	other	other	other	other	other	other	other	other
YBR186W	PCH2	other	other	other	other	other	other	other	other
YBR188C	NTC20	other	other	other	other	other	NA	other	other
YBR191W-A	YBR191W-A	other	other	other	other	other	other	other	other
YBR193C	MED8	other	other	other	other	other	other	other	other
YBR194W	AIM4	other	other	other	other	other	other	other	other
YBR195C	MSI1	other	other	other	other	other	other	other	other
YBR196C	PGI1	other	other	other	other	other	other	other	other
YBR197C	YBR197C	other	other	other	other	other	other	other	other
YBR198C	TAF5	other	other	other	other	other	other	other	other
YBR199W	KTR4	other	other	other	other	other	other	other	other
YBR200W	BEM1	other	other	other	other	other	other	other	other
YBR201W	DER1	other	other	other	other	other	other	other	other
YBR202W	MCM7	other	other	other	other	other	other	other	other
YBR204C	YBR204C	other	other	other	other	other	NA	other	other
YBR205W	KTR3	other	other	other	other	other	other	other	other
YBR206W	YBR206W	other	other	other	other	other	other	other	other
YBR207W	FTH1	other	other	other	other	other	other	other	other
YBR208C	DUR1,2	unrestored	other	other	other	unrestored	NA	other	other
YBR209W	YBR209W	other	other	other	other	other	other	other	other
YBR211C	AME1	other	other	other	other	other	other	other	other
YBR213W	MET8	other	other	other	other	other	other	other	other
YBR215W	HPC2	other	unrestored	restored	other	unrestored	other	other	other
YBR216C	YBP1	other	other	other	other	other	other	other	other
YBR217W	ATG12	other	other	other	other	other	other	other	other
YBR218C	PYC2	other	other	other	other	other	other	other	other
YBR219C	YBR219C	other	other	other	other	other	other	other	other
YBR222C	PCS60	other	other	other	other	other	other	other	other
YBR224W	YBR224W	other	other	other	other	other	other	other	other
YBR225W	YBR225W	other	other	other	other	other	other	other	other
YBR226C	YBR226C	other	other	other	other	other	other	other	other
YBR227C	MCX1	other	other	other	other	other	other	other	other
YBR228W	SLX1	other	other	other	other	other	other	other	other
YBR229C	ROT2	other	other	other	other	other	other	other	other
YBR230C	OM14	other	other	other	other	other	other	other	other
YBR231C	SWC5	other	other	other	other	other	other	other	other
YBR232C	YBR232C	other	other	other	other	other	other	other	other
YBR233W	PBP2	other	other	other	other	other	other	other	other
YBR234C	ARC40	other	other	other	other	other	other	other	other
YBR235W	YBR235W	other	other	other	other	other	other	other	other
YBR236C	ABD1	other	other	other	other	other	other	other	other
YBR239C	ERT1	other	other	other	other	other	other	other	other
YBR240C	THI2	other	other	other	other	other	other	other	other
YBR242W	YBR242W	other	other	other	unrestored	other	other	other	other
YBR244W	GPX2	other	unrestored	other	other	unrestored	NA	other	unrestored
YBR245C	ISW1	other	other	other	other	other	other	other	other
YBR248C	HIS7	other	other	other	other	other	other	other	other
YBR249C	ARO4	other	other	other	other	unrestored	other	other	unrestored
YBR250W	SPO23	other	other	other	other	other	other	other	other
YBR254C	TRS20	other	other	other	other	other	other	other	other
YBR255C-A	YBR255C-A	other	other	other	unrestored	other	other	other	other
YBR257W	POP4	other	other	other	other	other	other	other	other
YBR258C	SHG1	other	other	other	other	other	other	other	other
YBR259W	YBR259W	other	other	other	other	other	NA	other	other
YBR260C	RGD1	other	other	other	other	other	other	other	other
YBR261C	TAE1	other	other	other	other	other	other	unrestored	other
YBR262C	AIM5	other	other	other	unrestored	other	other	other	other
YBR263W	SHM1	other	other	other	other	other	NA	other	other
YBR264C	YPT10	other	other	other	other	other	other	other	other
YBR266C	SLM6	other	other	other	other	other	other	other	other
YBR267W	REI1	other	other	other	other	other	other	other	other
YBR271W	YBR271W	other	other	other	other	other	NA	other	other
YBR272C	HSM3	other	other	other	other	other	other	other	other
YBR274W	CHK1	other	other	other	other	other	other	other	other
YBR275C	RIF1	other	other	other	other	other	other	other	other
YBR276C	PPS1	other	other	other	other	other	other	other	other
YBR277C	YBR277C	other	other	other	other	other	other	other	other
YBR278W	DPB3	other	other	other	other	other	other	other	other
YBR279W	PAF1	other	other	other	other	other	other	other	other
YBR281C	DUG2	other	other	other	other	other	other	other	other
YBR286W	APE3	other	other	other	other	other	other	other	other
YBR287W	YBR287W	other	other	other	other	other	other	other	other
YBR288C	APM3	other	other	other	other	other	other	other	other
YBR289W	SNF5	other	other	other	other	other	other	other	other
YBR290W	BSD2	other	other	other	other	other	other	other	other
YBR293W	VBA2	other	other	other	other	other	other	other	other
YBR294W	SUL1	other	other	other	other	other	other	other	other
YBR296C	PHO89	restored	other	other	unrestored	other	unrestored	unrestored	other
YBR297W	MAL33	other	other	other	unrestored	other	other	other	other
YBR299W	MAL32	other	other	other	unrestored	other	NA	other	other
YBR300C	YBR300C	other	other	other	other	other	other	other	other
YBR301W	PAU24	other	other	other	other	other	NA	other	other
YCL001W	RER1	other	other	other	other	other	other	other	other
YCL001W-A	YCL001W-A	other	other	other	other	other	other	other	other
YCL001W-B	YCL001W-B	other	other	other	other	other	other	other	other
YCL004W	PGS1	other	other	other	other	other	other	other	other
YCL005W	LDB16	other	other	other	other	other	other	other	other
YCL008C	STP22	other	other	other	other	other	other	other	other
YCL009C	ILV6	other	other	other	other	other	other	other	other
YCL010C	SGF29	other	other	other	other	other	other	other	other
YCL011C	GBP2	other	other	other	other	other	other	other	other
YCL014W	BUD3	other	other	other	other	other	other	other	other
YCL016C	DCC1	other	other	other	other	other	other	other	other
YCL017C	NFS1	other	other	other	other	other	other	other	other
YCL018W	LEU2	other	other	other	other	other	other	other	other
YCL022C	YCL022C	other	other	other	other	other	other	other	other
YCL023C	YCL023C	other	other	other	other	other	other	other	other
YCL024W	KCC4	other	other	other	other	other	other	other	other
YCL025C	AGP1	other	other	other	other	other	other	other	other
YCL026C-A	FRM2	other	other	other	other	other	other	other	other
YCL026C-B	HBN1	other	other	other	other	other	other	other	other
YCL027W	FUS1	other	other	other	unrestored	other	NA	other	other
YCL028W	RNQ1	other	other	other	other	other	other	other	other
YCL029C	BIK1	other	other	other	other	other	other	other	other
YCL030C	HIS4	unrestored	other	other	other	other	other	other	other
YCL031C	RRP7	other	other	other	other	other	other	other	other
YCL032W	STE50	other	other	other	other	other	other	other	other
YCL033C	MXR2	other	other	other	other	other	other	other	other
YCL034W	LSB5	other	other	other	other	other	other	other	other
YCL035C	GRX1	other	other	other	unrestored	other	NA	other	other
YCL039W	GID7	other	other	other	other	other	other	other	other
YCL041C	YCL041C	other	other	other	other	other	other	other	other
YCL042W	YCL042W	other	unrestored	restored	unrestored	restored	other	restored	restored
YCL043C	PDI1	other	other	other	other	other	other	other	other
YCL044C	MGR1	other	other	other	other	other	NA	other	other
YCL045C	EMC1	other	other	other	other	other	NA	other	other
YCL046W	YCL046W	other	other	other	other	other	other	other	other
YCL047C	YCL047C	other	other	other	other	other	other	other	unrestored
YCL048W	SPS22	other	other	other	other	other	NA	other	other
YCL049C	YCL049C	other	other	other	unrestored	other	other	other	other
YCL050C	APA1	other	other	other	unrestored	other	other	other	other
YCL051W	LRE1	other	other	other	other	other	other	other	other
YCL052C	PBN1	other	other	other	other	other	other	other	other
YCL054W	SPB1	other	other	other	other	other	other	other	other
YCL055W	KAR4	other	other	other	unrestored	other	NA	other	other
YCL057C-A	YCL057C-A	other	other	other	unrestored	other	NA	other	other
YCL057W	PRD1	other	other	other	other	other	NA	other	unrestored
YCL058C	FYV5	other	other	other	other	other	other	other	other
YCL061C	MRC1	other	other	other	other	other	other	other	other
YCL064C	CHA1	unrestored	other	other	unrestored	unrestored	NA	other	restored
YCL065W	YCL065W	other	other	other	other	other	NA	other	other
YCL069W	VBA3	other	other	restored	other	other	other	other	NA
YCL074W	YCL074W	other	other	other	other	other	other	other	NA
YCL075W	YCL075W	other	other	other	other	other	other	other	NA
YCL076W	YCL076W	other	other	other	other	other	other	other	NA
YCR001W	YCR001W	other	other	other	other	other	other	other	other
YCR002C	CDC10	other	other	other	other	other	other	other	other
YCR004C	YCP4	other	other	other	other	other	other	other	other
YCR005C	CIT2	other	unrestored	restored	restored	unrestored	unrestored	other	other
YCR006C	YCR006C	other	other	other	other	other	other	other	other
YCR008W	SAT4	other	other	other	other	other	other	other	other
YCR009C	RVS161	other	other	other	other	other	other	other	other
YCR010C	ADY2	other	other	other	other	other	NA	other	other
YCR012W	PGK1	other	other	other	other	other	other	other	other
YCR016W	YCR016W	other	other	other	other	other	other	other	other
YCR017C	CWH43	other	other	other	other	other	other	other	other
YCR018C	SRD1	other	other	other	other	other	NA	other	other
YCR018C-A	YCR018C-A	other	other	other	other	other	other	other	other
YCR019W	MAK32	other	other	other	other	other	other	other	other
YCR020C	PET18	other	other	other	other	other	other	other	other
YCR020W-B	HTL1	other	other	other	other	other	other	other	other
YCR022C	YCR022C	other	other	other	other	other	other	other	other
YCR023C	YCR023C	other	other	other	other	other	other	other	other
YCR024C	SLM5	other	other	other	unrestored	other	other	other	other
YCR024C-A	PMP1	other	other	other	other	other	other	other	other
YCR025C	YCR025C	other	other	other	other	other	other	other	other
YCR026C	NPP1	other	other	other	other	other	other	other	other
YCR028C	FEN2	other	other	other	other	other	other	other	other
YCR028C-A	RIM1	other	other	other	other	other	other	other	other
YCR030C	SYP1	other	other	other	unrestored	other	other	other	other
YCR033W	SNT1	other	other	other	other	other	other	other	other
YCR035C	RRP43	other	other	other	other	other	other	other	other
YCR036W	RBK1	other	other	other	other	other	other	other	other
YCR037C	PHO87	other	other	other	other	other	other	other	other
YCR038C	BUD5	other	other	other	other	other	other	other	other
YCR038W-A	YCR038W-A	other	other	other	other	other	other	other	other
YCR040W	MATALPHA1	other	other	other	other	other	other	other	other
YCR041W	YCR041W	other	other	other	other	other	other	other	NA
YCR044C	PER1	other	other	other	other	other	other	other	NA
YCR045C	RRT12	other	other	other	other	other	other	other	NA
YCR046C	IMG1	other	other	other	unrestored	other	other	other	NA
YCR047C	BUD23	other	other	other	other	other	other	other	NA
YCR048W	ARE1	other	other	other	other	other	other	other	NA
YCR049C	YCR049C	other	other	other	other	other	other	other	NA
YCR050C	YCR050C	other	other	other	other	other	other	other	NA
YCR051W	YCR051W	other	other	other	other	other	other	other	NA
YCR052W	RSC6	other	other	other	other	other	other	other	NA
YCR053W	THR4	other	other	other	other	other	NA	other	NA
YCR054C	CTR86	other	other	other	other	other	other	other	NA
YCR059C	YIH1	other	other	other	other	other	other	unrestored	NA
YCR060W	TAH1	other	other	other	other	other	other	unrestored	NA
YCR061W	YCR061W	other	other	other	other	other	other	other	NA
YCR063W	BUD31	other	other	other	other	other	other	other	NA
YCR064C	YCR064C	other	other	other	other	other	NA	other	NA
YCR066W	RAD18	other	other	other	other	other	other	other	NA
YCR067C	SED4	other	other	other	other	other	other	other	NA
YCR068W	ATG15	other	other	other	other	other	other	other	NA
YCR069W	CPR4	other	other	other	other	other	other	other	NA
YCR071C	IMG2	other	other	other	other	other	NA	other	NA
YCR073C	SSK22	other	other	other	other	other	other	other	NA
YCR073W-A	SOL2	other	other	other	other	other	other	other	NA
YCR077C	PAT1	other	other	other	other	other	other	other	NA
YCR079W	PTC6	other	other	other	other	other	other	other	NA
YCR081W	SRB8	other	other	other	other	other	other	other	NA
YCR082W	AHC2	other	other	other	other	other	other	other	NA
YCR084C	TUP1	other	other	other	other	other	other	other	NA
YCR085W	YCR085W	other	other	other	other	other	other	other	NA
YCR086W	CSM1	other	other	other	other	other	other	other	NA
YCR087C-A	LUG1	other	other	other	unrestored	other	other	unrestored	NA
YCR087W	YCR087W	other	other	other	other	other	other	other	NA
YCR088W	ABP1	other	other	other	other	other	other	other	NA
YCR089W	FIG2	other	other	other	restored	other	other	other	NA
YCR090C	YCR090C	other	other	other	other	other	other	other	NA
YCR091W	KIN82	other	other	other	other	other	NA	other	NA
YCR092C	MSH3	other	other	other	other	other	other	other	NA
YCR093W	CDC39	other	other	other	other	other	other	other	NA
YCR094W	CDC50	other	other	other	other	other	other	other	NA
YCR095C	OCA4	other	other	other	other	other	other	other	NA
YCR098C	GIT1	other	other	other	other	other	NA	other	NA
YCR099C	YCR099C	other	other	other	other	other	NA	other	NA
YCR100C	YCR100C	other	other	other	other	other	NA	other	NA
YCR101C	YCR101C	other	other	other	other	other	NA	other	NA
YCR102C	YCR102C	other	other	other	other	other	NA	other	NA
YCR102W-A	YCR102W-A	other	other	other	other	other	other	other	NA
YCR104W	PAU3	other	other	other	other	other	other	other	NA
YCR105W	ADH7	other	other	other	other	other	other	other	NA
YCR106W	RDS1	other	other	other	other	other	NA	other	NA
YCR107W	AAD3	other	other	other	other	other	NA	unrestored	NA
YDL001W	RMD1	other	other	other	other	other	other	other	other
YDL002C	NHP10	other	other	other	other	other	other	other	other
YDL003W	MCD1	other	other	other	other	other	other	other	other
YDL004W	ATP16	other	other	other	other	other	other	other	other
YDL005C	MED2	other	other	other	other	other	other	other	other
YDL006W	PTC1	other	other	other	other	other	other	other	other
YDL007W	RPT2	other	other	other	other	other	other	other	other
YDL008W	APC11	other	other	other	other	other	other	other	other
YDL009C	YDL009C	other	other	other	other	other	other	other	other
YDL010W	GRX6	other	other	other	other	other	other	other	other
YDL011C	YDL011C	other	other	other	other	other	other	other	other
YDL012C	YDL012C	other	other	other	other	other	other	other	other
YDL016C	YDL016C	other	other	other	other	other	other	other	other
YDL017W	CDC7	other	other	other	other	other	other	other	other
YDL018C	ERP3	other	other	other	other	other	other	other	other
YDL019C	OSH2	other	other	other	other	other	other	other	other
YDL022W	GPD1	other	other	other	unrestored	other	NA	other	other
YDL023C	YDL023C	other	other	other	other	other	NA	other	other
YDL025C	YDL025C	other	other	other	other	other	other	other	other
YDL026W	YDL026W	other	other	other	other	other	other	other	other
YDL027C	YDL027C	other	other	other	other	other	other	other	other
YDL028C	MPS1	other	other	other	other	other	other	other	other
YDL029W	ARP2	other	other	other	other	other	other	other	other
YDL030W	PRP9	other	other	other	other	other	other	other	other
YDL031W	DBP10	other	other	other	other	other	other	other	other
YDL032W	YDL032W	other	other	other	other	other	other	other	other
YDL033C	SLM3	other	other	other	other	other	other	other	other
YDL034W	YDL034W	other	other	other	other	other	other	other	other
YDL035C	GPR1	other	other	other	other	other	other	other	other
YDL036C	PUS9	other	other	other	other	other	other	other	other
YDL040C	NAT1	other	other	other	other	other	other	other	other
YDL041W	YDL041W	other	other	other	other	other	other	other	other
YDL042C	SIR2	other	other	other	other	other	other	other	other
YDL043C	PRP11	other	other	other	other	other	other	other	other
YDL044C	MTF2	other	other	other	other	other	other	other	other
YDL045C	FAD1	other	other	other	other	other	other	other	other
YDL046W	NPC2	other	other	other	other	other	other	other	other
YDL047W	SIT4	other	other	other	other	other	other	other	other
YDL050C	YDL050C	other	other	other	other	other	other	other	other
YDL051W	LHP1	other	other	other	other	unrestored	other	other	other
YDL053C	PBP4	other	other	other	other	other	other	other	other
YDL054C	MCH1	other	other	other	other	other	other	other	other
YDL055C	PSA1	other	other	other	other	other	other	other	other
YDL056W	MBP1	other	other	other	other	other	other	other	other
YDL057W	YDL057W	other	other	other	other	other	other	other	other
YDL058W	USO1	other	other	other	other	other	other	other	other
YDL059C	RAD59	other	other	other	other	other	other	other	other
YDL060W	TSR1	other	other	other	other	other	other	other	other
YDL061C	RPS29B	other	other	other	other	other	other	other	other
YDL062W	YDL062W	other	other	other	other	other	other	other	other
YDL065C	PEX19	other	other	other	other	other	other	other	other
YDL066W	IDP1	other	other	other	other	other	other	other	other
YDL068W	YDL068W	other	other	other	other	other	NA	other	other
YDL069C	CBS1	other	other	other	other	other	other	other	other
YDL070W	BDF2	other	other	other	other	other	other	other	other
YDL071C	YDL071C	other	other	other	other	other	NA	other	other
YDL072C	YET3	other	other	other	other	other	other	other	other
YDL073W	YDL073W	other	other	other	other	other	other	other	other
YDL074C	BRE1	other	other	other	other	other	other	other	other
YDL076C	RXT3	other	other	other	other	other	NA	other	other
YDL077C	VAM6	other	other	other	other	other	other	other	other
YDL079C	MRK1	other	other	other	other	other	NA	other	other
YDL080C	THI3	other	other	other	other	other	other	other	other
YDL085C-A	YDL085C-A	other	other	other	unrestored	other	other	other	other
YDL086W	YDL086W	other	other	other	other	other	other	other	other
YDL087C	LUC7	other	other	other	other	other	NA	other	other
YDL088C	ASM4	other	other	other	other	other	other	other	other
YDL089W	NUR1	other	other	other	other	other	other	other	other
YDL090C	RAM1	other	other	other	other	other	other	other	other
YDL093W	PMT5	other	other	other	unrestored	other	other	other	other
YDL094C	YDL094C	other	other	other	other	other	NA	other	other
YDL096C	OPI6	other	other	other	other	other	other	other	other
YDL097C	RPN6	other	other	other	other	other	other	other	other
YDL098C	SNU23	other	other	other	other	other	other	other	other
YDL099W	BUG1	other	other	other	other	other	other	other	other
YDL100C	GET3	other	other	other	other	other	other	other	other
YDL102W	POL3	other	other	other	other	other	other	other	other
YDL103C	QRI1	other	other	other	other	other	other	other	other
YDL104C	QRI7	other	other	other	other	other	other	other	other
YDL105W	NSE4	other	other	other	other	other	other	other	other
YDL106C	PHO2	other	other	other	other	other	other	other	other
YDL107W	MSS2	other	other	other	other	other	other	other	other
YDL108W	KIN28	other	other	other	other	other	other	other	other
YDL109C	YDL109C	other	other	other	other	other	other	other	other
YDL112W	TRM3	other	other	other	other	other	other	other	other
YDL114W	YDL114W	other	other	other	other	other	other	other	other
YDL114W-A	YDL114W-A	other	other	other	other	other	other	other	other
YDL116W	NUP84	other	other	other	other	other	other	other	other
YDL117W	CYK3	other	other	other	other	other	other	other	other
YDL118W	YDL118W	other	other	other	other	other	other	other	other
YDL119C	YDL119C	other	other	other	other	other	NA	other	other
YDL120W	YFH1	other	other	other	other	other	other	other	other
YDL121C	YDL121C	other	other	other	other	other	other	other	other
YDL122W	UBP1	other	other	other	other	other	other	other	other
YDL123W	SNA4	other	other	other	other	other	other	other	other
YDL125C	HNT1	other	other	other	other	other	other	other	other
YDL128W	VCX1	other	other	other	other	other	other	other	other
YDL130W-A	STF1	other	unrestored	restored	restored	unrestored	other	restored	unrestored
YDL131W	LYS21	other	other	other	other	other	NA	other	other
YDL132W	CDC53	other	other	other	other	other	other	other	other
YDL133C-A	RPL41B	other	other	other	other	other	other	other	other
YDL134C	PPH21	other	other	other	other	other	other	other	other
YDL135C	RDI1	other	other	other	other	other	NA	other	other
YDL138W	RGT2	other	other	other	other	other	other	other	other
YDL139C	SCM3	other	other	other	other	other	other	other	other
YDL140C	RPO21	other	other	other	other	other	other	other	other
YDL141W	BPL1	other	other	other	other	other	other	other	other
YDL142C	CRD1	other	other	other	other	other	other	other	other
YDL143W	CCT4	other	other	other	other	other	other	other	other
YDL144C	YDL144C	other	other	other	other	other	other	other	other
YDL145C	COP1	other	other	other	other	other	other	other	other
YDL146W	LDB17	other	other	other	other	other	other	other	other
YDL150W	RPC53	other	other	other	other	other	other	other	other
YDL151C	BUD30	other	other	other	other	other	NA	other	other
YDL152W	YDL152W	other	other	other	other	other	other	other	other
YDL153C	SAS10	other	other	other	other	other	other	other	other
YDL155W	CLB3	other	other	other	other	other	other	other	other
YDL156W	CMR1	other	other	other	other	other	other	other	other
YDL157C	YDL157C	other	other	other	other	other	other	other	other
YDL159W	STE7	other	other	other	other	other	other	other	other
YDL159W-A	YDL159W-A	other	other	other	other	other	other	other	other
YDL161W	ENT1	other	other	other	other	other	other	other	other
YDL162C	YDL162C	other	other	other	other	other	other	other	other
YDL163W	YDL163W	other	other	other	other	other	other	other	other
YDL164C	CDC9	other	other	other	other	other	other	other	other
YDL165W	CDC36	other	other	other	other	other	other	other	other
YDL166C	FAP7	other	other	other	other	other	other	other	other
YDL168W	SFA1	other	other	other	other	other	other	other	other
YDL170W	UGA3	other	other	other	other	other	other	other	other
YDL171C	GLT1	other	other	other	other	unrestored	other	other	unrestored
YDL172C	YDL172C	other	other	other	other	other	other	other	other
YDL173W	PAR32	other	other	other	other	other	other	other	other
YDL174C	DLD1	other	other	other	other	other	other	other	other
YDL175C	AIR2	other	other	other	other	other	other	other	other
YDL176W	YDL176W	other	other	other	other	other	other	other	other
YDL178W	DLD2	other	other	other	other	other	other	other	other
YDL180W	YDL180W	other	other	other	other	other	other	other	other
YDL182W	LYS20	other	other	other	other	other	NA	other	other
YDL183C	YDL183C	other	other	other	other	other	NA	other	other
YDL184C	RPL41A	other	other	other	other	other	other	other	other
YDL185W	TFP1	other	other	other	other	other	other	other	other
YDL186W	YDL186W	other	other	other	other	other	other	other	other
YDL187C	YDL187C	other	other	other	other	other	other	other	other
YDL188C	PPH22	other	other	other	other	other	other	other	other
YDL189W	RBS1	other	other	other	other	other	other	other	other
YDL190C	UFD2	other	other	other	other	other	other	other	other
YDL192W	ARF1	other	other	other	other	other	other	other	other
YDL193W	NUS1	other	other	other	other	other	other	other	other
YDL197C	ASF2	other	other	other	other	other	other	other	other
YDL198C	GGC1	other	other	other	other	other	other	other	unrestored
YDL200C	MGT1	other	other	other	other	other	other	other	other
YDL201W	TRM8	other	other	other	other	other	other	other	other
YDL203C	ACK1	other	other	other	other	other	other	other	other
YDL205C	HEM3	other	other	other	other	other	other	other	other
YDL206W	YDL206W	other	other	other	other	other	other	other	other
YDL207W	GLE1	other	other	other	other	other	other	other	other
YDL209C	CWC2	other	other	other	other	other	other	other	other
YDL210W	UGA4	other	other	other	other	other	other	other	other
YDL211C	YDL211C	other	other	other	other	other	other	other	other
YDL213C	NOP6	other	other	other	other	other	other	other	other
YDL216C	RRI1	other	other	other	other	other	other	other	other
YDL217C	TIM22	other	other	other	other	other	other	other	other
YDL218W	YDL218W	other	other	other	other	other	NA	other	other
YDL220C	CDC13	other	other	other	other	other	other	other	other
YDL221W	YDL221W	other	other	other	other	other	other	other	other
YDL222C	FMP45	other	other	other	unrestored	other	NA	other	other
YDL224C	WHI4	other	other	other	other	other	other	other	other
YDL225W	SHS1	other	other	other	other	other	other	other	other
YDL226C	GCS1	other	other	other	other	other	other	other	other
YDL230W	PTP1	other	other	other	other	other	other	other	other
YDL231C	BRE4	other	other	other	other	other	other	other	other
YDL233W	YDL233W	other	other	other	other	other	other	other	other
YDL235C	YPD1	other	other	other	other	other	other	other	other
YDL236W	PHO13	other	other	other	other	other	other	other	other
YDL237W	AIM6	other	other	other	other	other	other	other	other
YDL239C	ADY3	other	other	other	other	other	other	other	other
YDL240C-A	YDL240C-A	other	other	other	other	other	other	other	other
YDL240W	LRG1	other	other	other	other	other	other	other	other
YDL242W	YDL242W	other	other	other	other	other	other	other	other
YDL243C	AAD4	other	other	other	other	other	other	other	other
YDL246C	SOR2	other	other	other	unrestored	other	other	unrestored	unrestored
YDL247W	MPH2	other	other	other	other	other	NA	other	other
YDL247W-A	YDL247W-A	other	other	other	other	other	NA	other	other
YDL248W	COS7	other	other	other	other	other	NA	other	other
YDR002W	YRB1	other	other	other	other	other	other	other	other
YDR004W	RAD57	other	other	other	other	other	other	other	other
YDR007W	TRP1	other	other	other	other	other	other	other	other
YDR008C	YDR008C	other	other	other	other	other	other	other	other
YDR009W	GAL3	other	other	other	unrestored	other	NA	other	other
YDR010C	YDR010C	other	other	other	other	other	NA	other	other
YDR011W	SNQ2	other	other	other	other	other	NA	other	other
YDR012W	RPL4B	other	other	other	other	other	other	other	other
YDR013W	PSF1	other	other	other	other	other	other	other	other
YDR014W	RAD61	other	other	other	other	other	other	other	other
YDR016C	DAD1	other	other	other	other	other	NA	other	other
YDR017C	KCS1	other	other	other	other	other	other	other	other
YDR019C	GCV1	restored	other	other	other	other	other	other	restored
YDR024W	FYV1	other	other	other	other	other	other	other	other
YDR026C	YDR026C	other	other	other	other	other	other	other	other
YDR027C	VPS54	other	other	other	other	other	other	other	other
YDR029W	YDR029W	other	other	other	other	other	NA	other	other
YDR031W	MIC14	other	other	other	other	other	other	other	other
YDR032C	PST2	other	other	other	other	other	other	other	other
YDR033W	MRH1	other	other	other	other	other	other	other	unrestored
YDR034C	LYS14	other	other	other	other	other	NA	other	other
YDR034C-A	YDR034C-A	other	other	other	other	other	other	other	other
YDR034W-B	YDR034W-B	other	other	other	restored	other	NA	unrestored	other
YDR035W	ARO3	other	other	other	other	unrestored	other	other	other
YDR036C	EHD3	other	other	other	other	other	other	other	other
YDR037W	KRS1	other	other	other	other	other	other	other	other
YDR038C	ENA5	other	other	other	other	other	other	other	other
YDR041W	RSM10	other	other	other	other	other	other	other	other
YDR042C	YDR042C	other	other	other	other	other	NA	other	other
YDR046C	BAP3	other	other	other	unrestored	other	NA	other	other
YDR047W	HEM12	other	other	other	other	other	other	other	other
YDR048C	YDR048C	other	other	other	other	other	other	other	other
YDR049W	YDR049W	other	other	other	other	other	other	other	other
YDR050C	TPI1	other	other	other	other	other	other	other	other
YDR051C	DET1	other	other	other	other	other	other	other	other
YDR052C	DBF4	other	other	other	other	other	other	other	other
YDR053W	YDR053W	other	other	other	other	other	other	other	other
YDR054C	CDC34	other	other	other	other	other	other	other	other
YDR055W	PST1	other	other	other	restored	other	other	other	unrestored
YDR056C	YDR056C	other	other	other	other	other	other	other	other
YDR057W	YOS9	other	other	other	other	other	other	restored	other
YDR058C	TGL2	other	other	other	other	other	other	other	other
YDR060W	MAK21	other	other	other	other	other	other	other	other
YDR061W	YDR061W	other	other	other	other	other	other	other	other
YDR063W	AIM7	other	other	other	other	other	NA	other	other
YDR065W	RRG1	other	other	other	other	other	other	other	other
YDR066C	RTR2	other	other	other	other	other	NA	other	other
YDR067C	OCA6	other	other	other	other	other	other	other	other
YDR068W	DOS2	other	other	other	other	other	other	other	other
YDR069C	DOA4	other	other	other	other	other	other	other	other
YDR071C	PAA1	other	other	other	other	other	NA	other	other
YDR072C	IPT1	other	other	other	other	other	other	other	other
YDR073W	SNF11	other	other	other	other	other	other	other	other
YDR075W	PPH3	other	other	other	other	other	other	other	other
YDR076W	RAD55	other	other	other	other	other	other	other	other
YDR077W	SED1	other	other	other	restored	unrestored	unrestored	restored	unrestored
YDR078C	SHU2	other	other	other	other	other	NA	other	other
YDR079C-A	TFB5	other	other	other	other	other	other	other	other
YDR079W	PET100	other	other	other	other	other	other	other	other
YDR080W	VPS41	other	other	other	other	other	other	other	other
YDR081C	PDC2	other	other	other	other	other	other	other	other
YDR082W	STN1	other	other	other	other	other	other	other	other
YDR086C	SSS1	other	other	other	other	other	other	other	other
YDR088C	SLU7	other	other	other	other	other	other	other	other
YDR089W	YDR089W	other	other	other	other	other	other	other	other
YDR090C	YDR090C	other	other	other	other	other	other	other	other
YDR092W	UBC13	other	other	other	other	other	other	other	other
YDR093W	DNF2	other	other	other	other	other	other	other	other
YDR094W	YDR094W	other	other	other	other	other	other	other	other
YDR095C	YDR095C	other	other	other	other	other	other	other	other
YDR096W	GIS1	other	other	other	other	other	other	other	other
YDR097C	MSH6	other	other	other	other	other	NA	other	other
YDR098C	GRX3	other	other	other	other	other	other	other	other
YDR098C-B	YDR098C-B	other	other	other	unrestored	other	other	restored	restored
YDR099W	BMH2	other	other	other	other	other	other	other	other
YDR102C	YDR102C	other	other	other	other	other	other	other	other
YDR103W	STE5	other	other	other	other	other	other	other	other
YDR105C	TMS1	other	other	other	other	other	other	other	other
YDR106W	ARP10	other	other	other	other	other	other	other	other
YDR107C	TMN2	other	other	other	other	other	other	other	other
YDR108W	GSG1	other	other	other	other	other	other	other	other
YDR109C	YDR109C	other	other	other	other	other	other	other	other
YDR110W	FOB1	other	other	other	other	other	NA	other	other
YDR111C	ALT2	other	other	other	other	other	other	other	other
YDR112W	IRC2	other	other	other	other	other	other	other	other
YDR113C	PDS1	other	other	other	other	other	other	other	other
YDR114C	YDR114C	other	other	other	other	other	other	other	other
YDR116C	MRPL1	other	other	other	unrestored	other	other	other	other
YDR117C	TMA64	other	other	other	other	other	other	other	other
YDR118W	APC4	other	other	other	other	other	other	other	other
YDR119W	VBA4	other	other	other	other	other	other	other	other
YDR120C	TRM1	other	other	other	other	other	other	other	other
YDR121W	DPB4	other	other	other	other	other	other	other	other
YDR123C	INO2	other	other	other	other	other	other	other	other
YDR124W	YDR124W	other	other	other	other	other	NA	other	other
YDR125C	ECM18	other	other	other	other	other	other	other	other
YDR126W	SWF1	other	other	other	other	other	NA	other	other
YDR127W	ARO1	other	other	other	other	other	other	other	other
YDR128W	MTC5	other	other	other	other	other	other	other	other
YDR129C	SAC6	other	other	other	other	other	other	other	other
YDR130C	FIN1	other	other	other	other	other	other	other	other
YDR131C	YDR131C	other	other	other	other	other	other	other	other
YDR132C	YDR132C	other	other	other	other	other	other	other	other
YDR135C	YCF1	other	other	other	other	other	other	other	other
YDR136C	VPS61	other	other	other	other	other	other	other	other
YDR137W	RGP1	other	other	other	other	other	other	other	other
YDR138W	HPR1	other	other	other	other	other	other	other	other
YDR139C	RUB1	other	other	other	other	other	other	other	other
YDR140W	MTQ2	other	other	other	other	other	other	other	other
YDR141C	DOP1	other	other	other	other	other	other	other	other
YDR142C	PEX7	other	other	other	other	other	other	other	other
YDR143C	SAN1	other	other	other	other	other	other	other	other
YDR145W	TAF12	other	other	other	other	other	other	other	other
YDR146C	SWI5	other	other	other	other	other	other	other	other
YDR147W	EKI1	other	other	other	other	other	other	other	other
YDR149C	YDR149C	other	other	other	other	other	other	other	other
YDR150W	NUM1	other	other	other	other	other	other	other	other
YDR151C	CTH1	other	other	other	other	other	other	other	other
YDR152W	GIR2	other	other	other	other	other	other	other	other
YDR153C	ENT5	other	other	other	other	other	other	other	other
YDR155C	CPR1	other	other	other	other	other	other	other	other
YDR157W	YDR157W	other	other	other	other	other	NA	other	other
YDR158W	HOM2	other	other	other	unrestored	other	other	other	other
YDR159W	SAC3	other	other	other	other	other	other	other	other
YDR160W	SSY1	other	other	other	other	other	other	other	other
YDR161W	YDR161W	other	other	other	other	other	other	other	other
YDR162C	NBP2	other	other	other	other	other	other	other	other
YDR164C	SEC1	other	other	other	other	other	other	other	other
YDR166C	SEC5	other	other	other	other	other	other	other	other
YDR167W	TAF10	other	other	other	other	other	other	other	other
YDR168W	CDC37	other	other	other	other	other	other	other	other
YDR170C	SEC7	other	other	other	other	other	other	other	other
YDR172W	SUP35	other	other	other	other	other	other	other	other
YDR173C	ARG82	other	other	other	other	other	other	other	other
YDR174W	HMO1	other	other	other	other	other	NA	other	other
YDR175C	RSM24	other	other	other	unrestored	other	other	other	other
YDR176W	NGG1	other	other	other	other	other	other	other	other
YDR177W	UBC1	other	other	other	other	other	other	other	other
YDR179C	CSN9	other	other	other	other	other	other	other	other
YDR179W-A	YDR179W-A	other	other	other	other	other	other	other	other
YDR180W	SCC2	other	other	other	other	other	other	other	other
YDR181C	SAS4	other	other	other	other	other	other	other	other
YDR182W	CDC1	other	other	other	other	other	other	other	other
YDR183W	PLP1	other	other	other	other	other	other	unrestored	other
YDR185C	UPS3	other	other	other	other	other	NA	other	other
YDR186C	YDR186C	other	other	other	other	other	other	other	other
YDR187C	YDR187C	other	other	other	other	other	other	other	other
YDR188W	CCT6	other	other	other	other	other	other	other	other
YDR189W	SLY1	other	other	other	other	other	other	other	other
YDR190C	RVB1	other	other	other	other	other	other	other	other
YDR191W	HST4	other	other	other	other	other	other	other	other
YDR192C	NUP42	other	other	other	other	other	other	other	other
YDR193W	YDR193W	other	other	other	other	other	other	other	other
YDR194C	MSS116	other	other	other	other	other	other	other	other
YDR195W	REF2	other	other	other	other	other	other	other	other
YDR196C	CAB5	other	other	other	other	other	NA	other	other
YDR197W	CBS2	other	other	other	unrestored	other	other	other	other
YDR198C	RKM2	other	other	other	other	other	other	other	other
YDR199W	YDR199W	other	other	other	other	other	other	other	other
YDR200C	VPS64	other	other	other	other	other	other	other	other
YDR201W	SPC19	other	other	other	other	other	other	other	other
YDR202C	RAV2	other	other	other	other	other	other	other	other
YDR203W	YDR203W	other	other	other	other	other	other	other	other
YDR205W	MSC2	other	other	other	other	other	other	other	other
YDR206W	EBS1	other	other	other	unrestored	other	other	other	other
YDR207C	UME6	other	other	other	other	other	other	other	other
YDR208W	MSS4	other	other	other	unrestored	other	other	other	other
YDR209C	YDR209C	other	other	other	other	other	other	other	other
YDR210C-D	YDR210C-D	other	other	other	other	unrestored	other	restored	restored
YDR211W	GCD6	other	other	other	other	other	other	other	other
YDR212W	TCP1	other	other	other	other	other	other	other	other
YDR213W	UPC2	other	other	other	other	other	other	other	other
YDR214W	AHA1	other	other	other	other	other	NA	other	other
YDR215C	YDR215C	other	other	other	other	other	other	other	other
YDR217C	RAD9	other	other	other	other	other	other	other	other
YDR218C	SPR28	other	other	other	other	other	NA	other	other
YDR219C	MFB1	other	other	other	other	other	other	other	other
YDR220C	YDR220C	other	other	other	other	other	other	other	other
YDR221W	GTB1	other	other	other	other	other	other	other	other
YDR222W	YDR222W	other	other	other	other	other	other	other	other
YDR223W	CRF1	other	other	other	other	other	NA	other	other
YDR224C	HTB1	other	other	other	other	other	other	other	other
YDR225W	HTA1	other	other	other	other	other	other	other	other
YDR226W	ADK1	other	other	other	other	other	other	other	other
YDR227W	SIR4	other	other	other	other	other	other	other	other
YDR228C	PCF11	other	other	other	other	other	other	other	other
YDR229W	IVY1	other	other	other	other	other	other	other	other
YDR230W	YDR230W	other	other	other	other	other	other	other	other
YDR232W	HEM1	other	other	other	other	other	other	other	other
YDR234W	LYS4	other	other	other	other	other	NA	other	other
YDR235W	PRP42	other	other	other	other	other	other	other	other
YDR236C	FMN1	other	other	other	other	other	other	other	other
YDR238C	SEC26	other	other	other	other	other	other	other	other
YDR239C	YDR239C	other	other	other	other	other	other	other	other
YDR240C	SNU56	other	other	other	other	other	other	other	other
YDR241W	BUD26	other	other	other	other	other	other	other	other
YDR243C	PRP28	other	other	other	other	other	other	other	other
YDR245W	MNN10	other	other	other	other	other	other	other	other
YDR246W	TRS23	other	other	other	other	other	other	other	other
YDR247W	VHS1	other	other	other	other	other	other	other	other
YDR248C	YDR248C	other	other	other	other	other	other	other	other
YDR249C	YDR249C	other	other	other	other	other	other	other	other
YDR250C	YDR250C	other	other	other	other	other	other	other	other
YDR251W	PAM1	other	other	other	other	other	other	other	other
YDR252W	BTT1	other	other	other	other	other	other	other	other
YDR253C	MET32	other	other	other	other	other	other	other	other
YDR254W	CHL4	other	other	other	other	other	other	other	other
YDR255C	RMD5	other	other	other	other	other	other	other	other
YDR256C	CTA1	other	other	other	other	other	NA	other	other
YDR257C	RKM4	other	other	other	other	other	other	other	other
YDR259C	YAP6	other	other	other	other	other	other	other	other
YDR260C	SWM1	other	other	other	other	other	other	other	other
YDR261C	EXG2	other	other	other	other	other	other	other	other
YDR261C-D	YDR261C-D	other	other	other	other	other	other	other	restored
YDR261W-B	YDR261W-B	other	restored	other	unrestored	unrestored	other	restored	restored
YDR263C	DIN7	other	other	other	other	other	NA	other	other
YDR264C	AKR1	other	other	other	other	other	NA	other	other
YDR265W	PEX10	other	other	other	other	other	other	other	other
YDR266C	YDR266C	other	other	other	other	other	other	other	other
YDR267C	CIA1	other	other	other	other	other	other	other	other
YDR268W	MSW1	other	other	other	other	other	other	other	other
YDR269C	YDR269C	other	other	other	other	other	other	other	other
YDR270W	CCC2	other	other	other	other	other	NA	other	other
YDR271C	YDR271C	other	other	other	other	other	other	other	other
YDR274C	YDR274C	other	other	other	other	other	other	other	other
YDR278C	YDR278C	other	other	other	other	other	other	other	other
YDR279W	RNH202	other	other	other	other	other	other	other	other
YDR280W	RRP45	other	other	other	other	other	other	other	other
YDR281C	PHM6	other	other	other	other	other	unrestored	other	unrestored
YDR282C	YDR282C	other	other	other	other	other	other	other	other
YDR283C	GCN2	other	other	other	other	other	other	other	other
YDR284C	DPP1	other	other	other	other	other	other	other	other
YDR285W	ZIP1	other	other	other	other	other	NA	other	other
YDR286C	YDR286C	other	other	other	other	other	other	other	other
YDR287W	INM2	other	other	other	other	other	other	other	other
YDR288W	NSE3	other	other	other	other	other	other	other	other
YDR289C	RTT103	other	other	other	other	other	other	other	other
YDR290W	YDR290W	other	other	other	other	other	other	other	other
YDR291W	HRQ1	other	other	other	other	other	other	other	other
YDR292C	SRP101	other	other	other	other	other	other	other	other
YDR293C	SSD1	other	other	other	other	other	other	other	other
YDR294C	DPL1	other	other	other	other	other	other	other	other
YDR295C	HDA2	other	other	other	other	other	other	other	other
YDR296W	MHR1	other	other	other	other	other	other	other	other
YDR299W	BFR2	other	other	other	other	other	other	other	other
YDR301W	CFT1	other	other	other	other	other	other	other	other
YDR303C	RSC3	other	other	other	other	other	other	other	other
YDR304C	CPR5	other	other	other	other	other	other	other	other
YDR305C	HNT2	other	other	other	other	other	other	other	other
YDR307W	YDR307W	other	other	other	other	other	other	other	other
YDR309C	GIC2	other	other	other	other	other	NA	other	other
YDR310C	SUM1	other	other	other	other	other	other	other	other
YDR311W	TFB1	other	other	other	other	other	other	other	other
YDR312W	SSF2	other	other	other	other	other	other	other	other
YDR314C	RAD34	other	other	other	other	other	other	other	other
YDR315C	IPK1	other	other	other	other	other	other	other	other
YDR316W	OMS1	other	other	other	other	other	other	other	other
YDR318W	MCM21	other	other	other	other	other	other	other	other
YDR319C	YFT2	other	other	other	other	other	other	other	other
YDR320C	SWA2	other	other	other	other	other	other	other	other
YDR320C-A	DAD4	other	other	other	other	other	other	other	restored
YDR323C	PEP7	other	other	other	other	other	other	other	other
YDR325W	YCG1	other	other	other	other	other	other	other	other
YDR326C	YSP2	other	other	other	other	other	other	other	other
YDR327W	YDR327W	other	other	other	other	other	NA	other	other
YDR328C	SKP1	other	other	other	other	other	other	other	other
YDR329C	PEX3	other	other	other	other	other	other	other	other
YDR330W	UBX5	other	other	other	other	other	other	other	other
YDR332W	IRC3	other	other	other	other	other	other	other	other
YDR333C	YDR333C	other	other	other	other	other	other	other	other
YDR334W	SWR1	other	other	other	other	other	other	other	other
YDR335W	MSN5	other	other	other	other	other	other	other	other
YDR336W	YDR336W	other	other	other	other	other	other	other	other
YDR337W	MRPS28	other	other	other	other	other	other	other	other
YDR338C	YDR338C	other	other	other	other	other	other	other	other
YDR339C	FCF1	other	other	other	other	other	other	other	other
YDR340W	YDR340W	other	other	other	other	other	other	other	other
YDR341C	YDR341C	other	other	other	other	other	other	other	other
YDR344C	YDR344C	other	other	other	other	other	other	other	other
YDR346C	SVF1	other	other	other	other	other	other	other	other
YDR348C	YDR348C	other	other	other	other	other	other	other	other
YDR349C	YPS7	other	other	other	other	other	other	other	other
YDR350C	ATP22	other	other	other	other	other	other	other	other
YDR351W	SBE2	other	other	other	other	other	other	other	other
YDR352W	YDR352W	other	other	other	other	other	other	other	other
YDR353W	TRR1	other	other	other	other	other	other	other	other
YDR355C	YDR355C	other	other	other	other	other	other	other	other
YDR356W	SPC110	other	other	other	other	other	other	other	other
YDR359C	EAF1	other	other	other	other	other	other	other	other
YDR360W	OPI7	other	other	other	other	other	other	other	other
YDR362C	TFC6	other	other	other	other	other	other	other	other
YDR363W	ESC2	other	other	other	other	other	other	other	other
YDR363W-A	SEM1	other	other	other	other	other	other	other	other
YDR364C	CDC40	other	other	other	other	other	other	other	other
YDR365C	ESF1	other	other	other	other	other	other	other	other
YDR368W	YPR1	other	other	other	other	other	NA	other	other
YDR369C	XRS2	other	other	other	other	other	NA	other	other
YDR370C	YDR370C	other	other	other	other	other	other	other	other
YDR371W	CTS2	other	other	other	other	other	other	other	other
YDR372C	VPS74	other	other	other	other	other	other	other	other
YDR373W	FRQ1	other	other	other	other	other	other	other	other
YDR374C	YDR374C	other	other	other	other	other	other	other	other
YDR376W	ARH1	other	other	other	other	other	other	other	other
YDR378C	LSM6	other	other	other	other	other	other	other	other
YDR379W	RGA2	other	other	other	other	other	other	other	other
YDR380W	ARO10	restored	unrestored	unrestored	restored	other	unrestored	other	unrestored
YDR381C-A	YDR381C-A	other	other	other	other	other	other	other	restored
YDR381W	YRA1	other	other	other	other	other	other	other	other
YDR383C	NKP1	other	other	other	other	other	other	other	other
YDR384C	ATO3	other	other	other	unrestored	other	other	other	other
YDR385W	EFT2	other	other	other	other	other	other	other	other
YDR386W	MUS81	other	other	other	other	other	other	other	other
YDR387C	YDR387C	other	other	other	other	other	other	other	other
YDR388W	RVS167	other	other	other	other	other	other	other	other
YDR389W	SAC7	other	other	other	other	other	other	other	other
YDR390C	UBA2	other	other	other	other	other	other	other	other
YDR392W	SPT3	other	other	other	other	other	other	other	other
YDR393W	SHE9	other	other	other	unrestored	other	other	other	other
YDR394W	RPT3	other	other	other	other	other	other	other	other
YDR395W	SXM1	other	other	other	other	other	other	other	other
YDR396W	YDR396W	other	other	other	other	other	other	other	other
YDR397C	NCB2	other	other	other	other	other	other	other	other
YDR399W	HPT1	other	other	other	other	other	other	other	unrestored
YDR400W	URH1	other	other	other	other	other	other	other	other
YDR401W	YDR401W	other	other	other	other	other	other	other	other
YDR402C	DIT2	other	other	other	other	other	NA	other	other
YDR403W	DIT1	other	other	other	other	other	NA	other	other
YDR405W	MRP20	other	other	other	unrestored	other	other	other	other
YDR406W	PDR15	other	unrestored	restored	unrestored	unrestored	other	other	other
YDR407C	TRS120	other	other	other	other	other	other	other	other
YDR409W	SIZ1	other	other	other	other	other	other	other	other
YDR411C	DFM1	other	other	other	other	other	other	other	other
YDR413C	YDR413C	other	other	other	other	other	other	other	other
YDR415C	YDR415C	other	other	other	other	other	other	other	other
YDR416W	SYF1	other	other	other	other	other	other	other	other
YDR418W	RPL12B	other	other	other	other	other	other	other	other
YDR419W	RAD30	other	other	other	other	other	other	other	other
YDR420W	HKR1	other	other	other	other	other	other	other	other
YDR421W	ARO80	other	other	other	other	other	NA	other	other
YDR422C	SIP1	other	other	other	other	other	other	other	other
YDR423C	CAD1	other	other	other	other	other	NA	other	other
YDR424C	DYN2	other	other	other	other	other	other	other	other
YDR425W	SNX41	other	other	other	other	other	other	other	other
YDR426C	YDR426C	other	other	other	other	other	other	other	other
YDR427W	RPN9	other	other	other	other	other	other	other	other
YDR428C	BNA7	other	other	other	other	other	other	unrestored	unrestored
YDR429C	TIF35	other	other	other	other	other	other	other	other
YDR430C	CYM1	other	other	other	unrestored	other	other	other	other
YDR431W	YDR431W	other	other	other	other	other	other	other	other
YDR433W	YDR433W	other	other	other	other	other	other	other	other
YDR434W	GPI17	other	other	other	other	other	other	other	other
YDR435C	PPM1	other	other	other	other	other	other	other	other
YDR436W	PPZ2	other	other	other	other	other	other	other	other
YDR437W	GPI19	other	other	other	other	other	NA	other	other
YDR438W	THI74	other	other	other	other	other	other	other	other
YDR439W	LRS4	other	other	other	other	other	other	other	other
YDR441C	APT2	other	other	other	other	other	other	other	other
YDR442W	YDR442W	other	other	other	other	other	other	other	other
YDR443C	SSN2	other	other	other	other	other	other	other	other
YDR444W	YDR444W	other	other	other	other	other	other	other	other
YDR445C	YDR445C	other	other	other	other	other	other	other	other
YDR446W	ECM11	other	other	other	other	other	other	other	other
YDR447C	RPS17B	other	other	other	other	other	other	other	other
YDR448W	ADA2	other	other	other	other	other	NA	other	other
YDR451C	YHP1	other	other	other	other	other	other	other	other
YDR452W	PPN1	other	other	other	other	other	other	other	other
YDR453C	TSA2	other	other	other	other	other	NA	other	other
YDR455C	YDR455C	other	other	other	other	other	other	other	other
YDR456W	NHX1	other	other	other	other	other	other	other	other
YDR457W	TOM1	other	other	other	other	other	NA	other	other
YDR458C	HEH2	other	other	other	other	other	other	other	other
YDR459C	PFA5	other	other	other	other	other	other	other	other
YDR461W	MFA1	unrestored	other	other	unrestored	unrestored	other	unrestored	unrestored
YDR463W	STP1	other	other	other	other	other	other	other	other
YDR464W	SPP41	other	other	other	other	other	other	other	other
YDR466W	PKH3	other	other	other	other	other	other	other	other
YDR467C	YDR467C	other	other	other	other	other	other	other	other
YDR468C	TLG1	other	other	other	other	other	other	other	other
YDR470C	UGO1	other	other	other	other	other	other	other	other
YDR475C	JIP4	other	other	other	other	other	other	other	other
YDR476C	YDR476C	other	other	other	other	other	other	other	other
YDR477W	SNF1	other	other	other	other	other	other	other	other
YDR478W	SNM1	other	other	other	other	other	other	other	other
YDR479C	PEX29	other	other	other	other	other	other	other	other
YDR480W	DIG2	other	other	other	other	other	other	other	other
YDR481C	PHO8	restored	other	other	other	other	other	other	other
YDR482C	CWC21	other	other	other	other	other	NA	other	other
YDR483W	KRE2	other	other	other	other	other	other	other	other
YDR484W	VPS52	other	other	other	other	other	other	other	other
YDR485C	VPS72	other	other	other	other	other	other	other	other
YDR487C	RIB3	other	other	other	other	other	other	other	other
YDR488C	PAC11	other	other	other	other	other	other	other	other
YDR490C	PKH1	other	other	other	other	other	NA	other	other
YDR491C	YDR491C	other	other	other	other	other	other	other	other
YDR492W	IZH1	other	other	other	other	other	NA	other	other
YDR493W	AIM8	other	other	other	unrestored	other	other	other	other
YDR494W	RSM28	other	other	other	other	other	other	other	other
YDR495C	VPS3	other	other	other	other	other	other	other	other
YDR497C	ITR1	other	other	other	other	other	other	other	other
YDR498C	SEC20	other	other	other	other	other	other	other	other
YDR499W	LCD1	other	other	other	other	other	other	other	other
YDR500C	RPL37B	other	other	other	other	other	other	other	other
YDR502C	SAM2	unrestored	other	other	other	other	unrestored	other	other
YDR503C	LPP1	other	other	other	other	other	other	other	other
YDR506C	YDR506C	other	other	other	other	other	other	other	other
YDR507C	GIN4	other	other	other	other	other	other	other	other
YDR508C	GNP1	other	other	other	other	other	NA	other	other
YDR509W	YDR509W	other	other	other	other	other	other	other	other
YDR510W	SMT3	other	other	other	other	other	other	other	other
YDR511W	ACN9	other	other	other	unrestored	other	other	other	other
YDR512C	EMI1	other	other	other	other	other	other	other	other
YDR513W	GRX2	other	other	other	other	other	NA	other	other
YDR514C	YDR514C	other	other	other	other	other	other	other	other
YDR515W	SLF1	other	other	other	other	other	other	other	other
YDR516C	EMI2	other	unrestored	restored	unrestored	other	NA	other	other
YDR517W	GRH1	other	other	other	other	other	other	other	other
YDR520C	URC2	other	other	other	other	other	other	other	other
YDR521W	YDR521W	other	other	other	other	other	other	other	other
YDR522C	SPS2	other	other	other	other	other	other	other	other
YDR523C	SPS1	other	other	other	other	other	NA	other	other
YDR524C	AGE1	other	other	other	other	other	other	other	other
YDR525W	API2	other	other	other	other	other	other	other	other
YDR525W-A	SNA2	other	other	other	unrestored	other	other	other	other
YDR526C	YDR526C	other	other	other	other	other	other	other	other
YDR527W	RBA50	other	other	other	other	other	NA	other	other
YDR528W	HLR1	other	other	other	other	other	NA	other	other
YDR529C	QCR7	other	other	other	unrestored	other	other	unrestored	other
YDR530C	APA2	other	other	other	other	other	other	other	other
YDR531W	CAB1	other	other	other	other	other	other	other	other
YDR532C	YDR532C	other	other	other	other	other	NA	other	other
YDR533C	HSP31	other	other	other	other	other	NA	other	other
YDR534C	FIT1	other	restored	restored	other	unrestored	other	other	other
YDR535C	YDR535C	other	other	other	other	other	other	other	other
YDR536W	STL1	other	other	other	other	other	other	other	other
YDR537C	YDR537C	other	other	other	other	other	other	other	other
YDR538W	PAD1	other	other	other	other	other	other	other	other
YDR539W	YDR539W	other	other	other	other	other	other	other	other
YDR540C	IRC4	other	other	other	other	other	NA	other	other
YDR541C	YDR541C	other	other	other	other	other	NA	unrestored	other
YDR543C	YDR543C	other	other	other	other	other	other	other	other
YDR544C	YDR544C	other	other	other	unrestored	other	other	other	other
YEL003W	GIM4	other	other	other	other	other	other	other	other
YEL004W	YEA4	other	other	other	other	other	other	other	other
YEL006W	YEA6	other	other	other	other	other	other	other	other
YEL007W	YEL007W	other	other	other	other	other	NA	other	other
YEL008W	YEL008W	other	other	other	other	other	other	other	other
YEL010W	YEL010W	other	other	other	other	other	other	other	restored
YEL012W	UBC8	other	other	other	other	other	other	other	other
YEL013W	VAC8	other	other	other	other	other	other	other	other
YEL014C	YEL014C	other	other	other	other	other	other	other	other
YEL015W	EDC3	other	other	other	other	other	other	other	other
YEL016C	NPP2	other	other	other	unrestored	other	other	other	other
YEL018W	EAF5	other	other	other	other	other	other	other	other
YEL019C	MMS21	other	other	other	other	other	other	other	other
YEL021W	URA3	other	other	other	other	other	NA	other	other
YEL022W	GEA2	other	other	other	other	other	other	other	other
YEL023C	YEL023C	other	other	other	other	other	other	other	other
YEL024W	RIP1	other	other	other	unrestored	other	NA	unrestored	other
YEL025C	YEL025C	other	other	other	other	other	other	other	other
YEL028W	YEL028W	other	other	other	other	other	other	other	other
YEL029C	BUD16	other	other	other	other	other	other	other	other
YEL030W	ECM10	other	other	other	other	other	NA	other	other
YEL031W	SPF1	other	other	other	other	other	other	other	other
YEL032W	MCM3	other	other	other	other	other	other	other	unrestored
YEL033W	MTC7	other	other	other	other	other	other	other	other
YEL034W	HYP2	other	other	other	other	other	other	other	other
YEL035C	UTR5	other	other	other	other	other	other	other	other
YEL036C	ANP1	other	other	other	other	other	other	other	other
YEL037C	RAD23	other	other	other	other	other	other	other	other
YEL038W	UTR4	other	other	other	other	other	other	other	other
YEL043W	YEL043W	other	other	other	other	other	other	other	other
YEL044W	IES6	other	other	other	other	other	other	other	other
YEL045C	YEL045C	other	other	other	unrestored	other	other	other	other
YEL046C	GLY1	other	other	other	other	unrestored	NA	other	other
YEL047C	YEL047C	other	other	other	unrestored	other	other	other	other
YEL049W	PAU2	other	other	other	other	other	NA	other	other
YEL050C	RML2	other	other	other	other	other	other	other	other
YEL051W	VMA8	other	other	other	other	other	other	other	other
YEL052W	AFG1	other	other	other	other	other	other	other	other
YEL053C	MAK10	other	other	other	other	other	other	other	other
YEL055C	POL5	other	other	other	other	other	other	other	other
YEL056W	HAT2	other	other	other	other	other	other	other	other
YEL057C	YEL057C	other	other	other	unrestored	other	NA	other	other
YEL058W	PCM1	other	other	other	other	other	other	other	other
YEL059C-A	SOM1	other	other	other	unrestored	other	other	other	other
YEL059W	ENV6	other	other	other	other	other	other	other	other
YEL061C	CIN8	other	other	other	other	other	other	other	other
YEL062W	NPR2	other	other	other	other	other	other	other	other
YEL063C	CAN1	other	other	other	other	other	other	other	other
YEL064C	AVT2	other	other	other	other	other	other	other	other
YEL065W	SIT1	other	unrestored	restored	other	unrestored	NA	other	other
YEL066W	HPA3	other	other	other	other	other	other	other	other
YEL067C	YEL067C	other	other	other	other	other	NA	other	other
YEL068C	YEL068C	other	other	other	other	other	other	other	other
YEL069C	HXT13	other	other	other	other	other	other	other	other
YEL071W	DLD3	other	other	other	other	other	other	other	other
YEL072W	RMD6	other	other	other	other	other	other	other	other
YEL073C	YEL073C	other	other	other	other	other	other	other	other
YEL074W	YEL074W	other	other	other	other	other	NA	other	other
YEL075W-A	YEL075W-A	other	other	other	other	other	NA	other	other
YEL076C	YEL076C	other	other	other	other	other	NA	other	other
YER001W	MNN1	other	other	other	other	other	other	other	other
YER002W	NOP16	other	other	other	other	other	other	other	other
YER004W	FMP52	other	other	other	other	other	other	other	other
YER005W	YND1	other	other	other	other	other	other	other	other
YER006W	NUG1	other	other	other	other	other	other	other	other
YER007W	PAC2	other	other	other	other	other	other	other	other
YER008C	SEC3	other	other	other	other	other	other	other	other
YER010C	YER010C	other	other	other	other	other	other	unrestored	other
YER012W	PRE1	other	other	other	other	other	other	other	other
YER013W	PRP22	other	other	other	other	other	other	other	other
YER014C-A	BUD25	other	other	other	other	other	other	other	other
YER014W	HEM14	other	other	other	other	other	other	other	other
YER016W	BIM1	other	other	other	other	other	other	other	other
YER017C	AFG3	other	other	other	other	other	other	other	other
YER018C	SPC25	other	other	other	other	other	other	other	other
YER019C-A	SBH2	other	other	other	other	other	other	other	other
YER019W	ISC1	other	other	other	other	other	other	other	other
YER021W	RPN3	other	other	other	other	other	other	other	other
YER022W	SRB4	other	other	other	other	other	other	other	other
YER023W	PRO3	other	other	other	other	other	other	other	other
YER026C	CHO1	other	other	other	other	unrestored	other	other	other
YER027C	GAL83	other	other	other	other	other	other	other	other
YER028C	MIG3	other	other	other	unrestored	other	other	other	other
YER029C	SMB1	other	other	other	other	other	other	other	other
YER030W	CHZ1	other	other	other	other	other	other	other	other
YER031C	YPT31	other	other	other	other	other	other	other	other
YER032W	FIR1	other	other	other	other	other	other	other	other
YER033C	ZRG8	other	other	other	other	other	other	other	other
YER036C	ARB1	other	other	other	other	other	other	other	other
YER037W	PHM8	restored	unrestored	unrestored	restored	other	other	unrestored	other
YER038C	KRE29	other	other	other	other	other	other	other	other
YER039C	HVG1	other	other	other	other	other	other	other	other
YER039C-A	YER039C-A	other	other	other	other	other	other	other	other
YER040W	GLN3	other	other	other	other	other	other	other	other
YER041W	YEN1	other	other	other	other	other	other	other	other
YER042W	MXR1	other	other	other	other	other	NA	other	other
YER043C	SAH1	other	other	other	other	other	other	other	other
YER044C-A	MEI4	other	other	other	other	other	NA	other	other
YER046W	SPO73	other	other	other	other	other	other	other	other
YER047C	SAP1	other	other	other	other	other	other	other	other
YER048C	CAJ1	other	other	other	other	other	other	other	other
YER050C	RSM18	other	other	other	other	other	other	other	other
YER052C	HOM3	other	other	other	other	other	other	other	other
YER056C	FCY2	other	other	other	other	other	other	other	other
YER056C-A	RPL34A	other	other	other	other	other	other	other	other
YER057C	HMF1	other	other	other	other	other	other	other	other
YER059W	PCL6	other	other	other	other	other	other	other	other
YER061C	CEM1	other	other	other	other	other	other	other	other
YER062C	HOR2	other	other	other	other	other	NA	other	other
YER063W	THO1	other	other	other	other	other	NA	other	other
YER064C	YER064C	other	other	other	other	other	NA	other	other
YER065C	ICL1	other	other	other	other	other	NA	other	other
YER066C-A	YER066C-A	other	other	other	other	other	other	other	other
YER066W	RRT13	other	other	other	other	other	other	other	other
YER068W	MOT2	other	other	other	other	other	other	other	other
YER069W	ARG5,6	other	other	other	other	other	other	other	other
YER071C	TDA2	other	other	other	other	other	other	other	other
YER073W	ALD5	other	other	other	unrestored	other	NA	other	other
YER074W	RPS24A	other	other	other	other	other	other	other	other
YER075C	PTP3	other	other	other	other	other	other	other	other
YER076C	YER076C	other	other	other	other	other	other	other	other
YER077C	YER077C	other	other	other	other	other	other	other	other
YER078C	ICP55	other	other	other	other	other	other	other	other
YER079W	YER079W	other	other	other	unrestored	other	other	other	other
YER080W	AIM9	other	other	other	other	other	other	other	other
YER081W	SER3	other	other	other	other	unrestored	other	other	restored
YER082C	UTP7	other	other	other	other	other	other	other	other
YER083C	GET2	other	other	other	other	other	other	other	other
YER084W	YER084W	other	other	other	other	other	other	other	restored
YER085C	YER085C	other	other	other	other	other	other	other	other
YER087C-B	SBH1	other	other	other	other	other	other	other	other
YER087W	AIM10	other	other	other	other	other	other	other	other
YER088C	DOT6	other	other	other	other	other	other	other	other
YER089C	PTC2	other	other	other	other	other	other	other	other
YER090W	TRP2	other	other	other	other	other	other	other	other
YER091C-A	YER091C-A	other	other	other	other	other	NA	other	other
YER092W	IES5	other	other	other	other	other	other	other	other
YER093C	TSC11	other	other	other	other	other	other	other	other
YER093C-A	AIM11	other	other	other	unrestored	other	other	other	other
YER094C	PUP3	other	other	other	other	other	other	other	other
YER095W	RAD51	other	other	other	unrestored	other	other	other	other
YER097W	YER097W	other	other	other	other	other	other	other	other
YER098W	UBP9	other	other	other	other	other	other	other	other
YER099C	PRS2	other	other	other	other	other	other	other	other
YER100W	UBC6	other	other	other	other	other	other	other	other
YER101C	AST2	other	other	other	other	other	other	other	other
YER104W	RTT105	other	other	other	other	other	other	other	other
YER105C	NUP157	other	other	other	other	other	other	other	other
YER106W	MAM1	other	other	other	other	other	other	other	other
YER107C	GLE2	other	other	other	other	other	other	other	other
YER109C	FLO8	other	other	other	other	other	NA	other	other
YER111C	SWI4	other	other	other	other	other	other	other	other
YER112W	LSM4	other	other	other	other	other	other	other	other
YER114C	BOI2	other	other	other	other	other	other	other	other
YER115C	SPR6	other	other	other	other	other	other	other	other
YER116C	SLX8	other	other	other	other	other	NA	other	other
YER119C	AVT6	other	other	other	other	other	other	other	other
YER119C-A	YER119C-A	other	other	other	other	other	other	other	other
YER120W	SCS2	other	other	other	other	other	other	other	other
YER122C	GLO3	other	other	other	other	other	other	other	other
YER123W	YCK3	other	other	other	other	other	other	other	other
YER124C	DSE1	unrestored	other	other	restored	other	other	other	other
YER125W	RSP5	other	other	other	other	other	other	other	other
YER126C	NSA2	other	other	other	other	other	other	other	other
YER127W	LCP5	other	other	other	other	other	other	other	other
YER128W	YER128W	other	other	other	other	other	other	other	other
YER129W	SAK1	other	other	other	other	other	other	other	other
YER132C	PMD1	other	other	other	other	other	other	other	other
YER133W	GLC7	other	other	other	other	other	other	other	other
YER134C	YER134C	other	other	other	other	other	other	other	other
YER135C	YER135C	other	other	other	other	other	other	other	other
YER136W	GDI1	other	other	other	other	other	other	other	other
YER137C	YER137C	other	other	other	other	other	other	other	other
YER138W-A	YER138W-A	other	restored	other	other	unrestored	NA	restored	restored
YER139C	RTR1	other	other	other	other	other	NA	other	other
YER140W	YER140W	other	other	other	other	other	NA	other	other
YER141W	COX15	other	other	other	other	other	NA	unrestored	unrestored
YER142C	MAG1	other	other	other	other	other	NA	other	other
YER144C	UBP5	other	other	other	other	other	NA	other	other
YER145C	FTR1	other	other	other	other	other	NA	other	other
YER148W	SPT15	other	other	other	unrestored	other	NA	other	other
YER149C	PEA2	other	other	other	other	other	NA	other	other
YER151C	UBP3	other	other	other	other	other	NA	other	other
YER152C	YER152C	other	other	other	other	other	NA	other	other
YER153C	PET122	other	other	other	other	other	NA	other	other
YER154W	OXA1	other	other	other	other	other	NA	other	other
YER157W	COG3	other	other	other	other	other	NA	other	other
YER161C	SPT2	other	other	other	other	other	other	other	other
YER163C	YER163C	other	other	other	other	other	NA	other	other
YER164W	CHD1	other	other	other	other	other	other	other	other
YER165W	PAB1	other	other	other	other	other	other	other	other
YER166W	DNF1	other	other	other	other	other	NA	other	other
YER167W	BCK2	other	other	other	other	other	other	other	other
YER168C	CCA1	other	other	other	other	other	other	other	other
YER170W	ADK2	other	other	other	other	other	other	other	other
YER171W	RAD3	other	other	other	other	other	other	other	other
YER172C	BRR2	other	other	other	other	other	other	other	other
YER173W	RAD24	other	other	other	other	other	other	other	other
YER174C	GRX4	other	other	other	other	other	other	other	other
YER175C	TMT1	other	unrestored	restored	other	other	other	other	other
YER176W	ECM32	other	other	other	other	other	other	other	other
YER177W	BMH1	other	other	other	other	other	other	other	other
YER178W	PDA1	other	other	other	other	other	other	other	other
YER179W	DMC1	other	other	other	other	other	NA	other	other
YER180C	ISC10	other	other	other	other	other	other	other	other
YER181C	YER181C	other	other	other	other	other	other	other	other
YER182W	FMP10	other	other	other	unrestored	other	NA	other	other
YER184C	YER184C	other	other	other	other	other	other	other	other
YER185W	PUG1	other	other	other	other	other	other	other	other
YER186C	YER186C	other	other	other	other	other	other	other	other
YER187W	YER187W	other	other	other	other	other	other	unrestored	other
YER188W	YER188W	other	other	other	other	other	NA	other	other
YFL001W	DEG1	other	other	other	other	other	other	other	other
YFL002C	SPB4	other	other	other	other	other	other	other	other
YFL003C	MSH4	other	other	other	other	other	other	other	other
YFL004W	VTC2	other	other	other	other	other	other	other	other
YFL005W	SEC4	other	other	other	other	other	other	other	other
YFL007W	BLM10	other	other	other	other	other	NA	other	other
YFL008W	SMC1	other	other	other	other	other	other	other	other
YFL009W	CDC4	other	other	other	other	other	other	other	other
YFL010C	WWM1	other	other	other	other	other	other	other	other
YFL010W-A	AUA1	other	other	other	other	other	other	other	other
YFL011W	HXT10	other	other	other	other	other	NA	other	other
YFL012W	YFL012W	other	other	other	other	other	other	other	other
YFL012W-A	YFL012W-A	other	other	other	other	other	other	other	other
YFL015C	YFL015C	other	other	other	other	other	other	other	other
YFL016C	MDJ1	other	other	other	unrestored	other	other	other	other
YFL017C	GNA1	other	other	other	other	other	other	other	other
YFL017W-A	SMX2	other	other	other	other	other	other	other	other
YFL019C	YFL019C	other	other	other	other	other	other	other	other
YFL020C	PAU5	other	other	other	other	other	other	other	other
YFL021W	GAT1	other	other	other	other	other	other	other	other
YFL023W	BUD27	other	other	other	other	other	other	other	other
YFL024C	EPL1	other	other	other	unrestored	other	other	other	other
YFL025C	BST1	other	other	other	other	other	NA	other	other
YFL027C	GYP8	other	other	other	other	other	other	other	other
YFL028C	CAF16	other	other	other	other	other	other	other	other
YFL029C	CAK1	other	other	other	other	other	other	other	other
YFL031W	HAC1	other	other	other	other	other	other	other	other
YFL032W	YFL032W	other	other	other	other	other	other	other	other
YFL033C	RIM15	other	other	other	other	other	other	other	other
YFL034W	YFL034W	other	other	other	other	other	other	other	other
YFL036W	RPO41	other	other	other	unrestored	other	other	other	other
YFL037W	TUB2	other	other	other	other	other	other	other	other
YFL038C	YPT1	other	other	other	other	other	other	other	unrestored
YFL039C	ACT1	other	other	other	other	other	other	other	other
YFL040W	YFL040W	other	other	other	other	other	other	other	other
YFL041W	FET5	other	other	other	other	other	other	other	other
YFL042C	YFL042C	other	other	other	other	other	other	other	other
YFL044C	OTU1	other	other	other	other	other	other	other	other
YFL046W	FMP32	other	other	other	other	other	other	other	other
YFL047W	RGD2	other	other	other	other	other	other	other	other
YFL049W	SWP82	other	other	other	other	other	other	other	other
YFL050C	ALR2	other	other	other	other	other	other	other	other
YFL051C	YFL051C	other	other	other	other	other	other	other	other
YFL052W	YFL052W	other	other	other	other	other	other	other	other
YFL053W	DAK2	other	other	other	other	other	NA	other	other
YFL055W	AGP3	other	other	other	other	other	other	other	other
YFL056C	AAD6	other	other	other	other	other	other	other	other
YFL059W	SNZ3	other	other	other	other	other	other	other	other
YFL061W	DDI2	other	other	other	other	other	NA	other	other
YFL063W	YFL063W	other	other	other	other	other	other	other	other
YFL064C	YFL064C	other	other	other	other	other	NA	other	other
YFL067W	YFL067W	other	other	other	other	other	NA	other	other
YFR001W	LOC1	other	other	other	other	other	other	other	other
YFR002W	NIC96	other	other	other	other	other	other	other	other
YFR004W	RPN11	other	other	other	other	other	other	other	other
YFR006W	YFR006W	other	other	other	other	unrestored	other	unrestored	unrestored
YFR008W	FAR7	other	other	other	other	other	other	other	other
YFR009W	GCN20	other	other	other	other	other	other	other	other
YFR010W	UBP6	other	other	other	other	other	other	other	other
YFR012W	YFR012W	other	other	other	other	other	other	other	other
YFR012W-A	YFR012W-A	other	other	other	other	other	other	other	other
YFR013W	IOC3	other	other	other	other	other	other	other	other
YFR014C	CMK1	other	other	other	other	other	other	other	other
YFR016C	YFR016C	other	other	other	other	other	other	other	other
YFR018C	YFR018C	other	other	other	other	other	NA	other	other
YFR019W	FAB1	other	other	other	other	other	other	other	other
YFR020W	YFR020W	other	other	other	other	other	other	other	other
YFR021W	ATG18	other	other	other	other	other	NA	other	other
YFR022W	ROG3	other	other	other	other	other	NA	other	other
YFR023W	PES4	other	other	other	other	other	NA	unrestored	other
YFR024C-A	LSB3	other	other	other	other	other	other	other	other
YFR025C	HIS2	other	other	other	other	other	other	other	other
YFR026C	ULI1	other	other	other	other	other	other	other	restored
YFR027W	ECO1	other	other	other	other	other	other	other	other
YFR028C	CDC14	other	other	other	other	other	other	other	other
YFR030W	MET10	other	other	other	other	other	NA	other	other
YFR031C	SMC2	other	other	other	other	other	other	other	other
YFR032C	RRT5	other	other	other	other	other	other	other	other
YFR032C-A	RPL29	other	other	other	other	other	other	other	other
YFR034C	PHO4	other	other	other	other	other	other	other	other
YFR035C	YFR035C	other	other	other	other	other	other	other	other
YFR036W	CDC26	other	other	other	other	other	other	unrestored	other
YFR037C	RSC8	other	other	other	other	other	other	other	other
YFR038W	IRC5	other	other	other	other	other	other	other	other
YFR039C	YFR039C	other	other	other	other	other	other	other	other
YFR040W	SAP155	other	other	other	other	other	other	other	other
YFR043C	IRC6	other	other	other	other	other	other	other	other
YFR044C	DUG1	other	other	other	other	other	other	other	unrestored
YFR045W	YFR045W	other	other	other	unrestored	other	other	other	other
YFR046C	CNN1	other	other	other	other	other	other	other	other
YFR047C	BNA6	other	other	other	other	other	other	other	other
YFR048W	RMD8	other	other	other	other	other	other	other	other
YFR050C	PRE4	other	other	other	other	other	other	other	other
YFR051C	RET2	other	other	other	other	other	NA	other	other
YFR052W	RPN12	other	other	other	other	other	other	other	other
YFR054C	YFR054C	other	other	other	other	other	NA	other	other
YFR056C	YFR056C	other	other	other	other	other	other	other	other
YFR057W	YFR057W	other	other	other	other	other	other	other	other
YGL002W	ERP6	other	other	other	other	other	other	other	other
YGL003C	CDH1	other	other	other	other	other	other	other	other
YGL004C	RPN14	other	other	other	other	other	other	other	other
YGL005C	COG7	other	other	other	other	other	other	other	other
YGL007W	BRP1	other	other	other	other	other	NA	other	other
YGL008C	PMA1	other	other	other	other	other	other	other	other
YGL009C	LEU1	other	other	other	unrestored	other	NA	other	other
YGL011C	SCL1	other	other	other	other	other	other	other	other
YGL012W	ERG4	other	other	other	other	other	other	other	other
YGL013C	PDR1	other	other	other	other	other	other	other	other
YGL014W	PUF4	other	other	other	other	other	other	other	other
YGL015C	YGL015C	other	other	other	other	other	NA	other	other
YGL017W	ATE1	other	other	other	other	other	other	other	other
YGL018C	JAC1	other	other	other	other	other	other	other	other
YGL019W	CKB1	other	other	other	other	other	other	other	other
YGL021W	ALK1	other	other	other	other	other	other	other	other
YGL022W	STT3	other	other	other	other	other	other	other	other
YGL023C	PIB2	other	other	other	other	other	other	other	other
YGL024W	YGL024W	other	other	other	other	other	NA	other	other
YGL025C	PGD1	other	other	other	other	other	other	other	other
YGL026C	TRP5	other	other	other	other	other	other	other	other
YGL027C	CWH41	other	other	other	other	other	other	other	other
YGL028C	SCW11	other	other	other	restored	other	other	other	other
YGL029W	CGR1	other	other	other	other	other	other	other	other
YGL030W	RPL30	other	other	other	other	other	other	other	other
YGL032C	AGA2	unrestored	other	other	restored	unrestored	other	other	other
YGL033W	HOP2	other	other	other	other	other	other	other	other
YGL034C	YGL034C	other	other	other	other	other	NA	other	other
YGL035C	MIG1	other	other	other	other	other	other	other	other
YGL036W	YGL036W	other	other	other	other	other	NA	other	other
YGL038C	OCH1	other	other	other	other	other	other	other	other
YGL039W	YGL039W	other	other	other	other	other	other	unrestored	other
YGL041C	YGL041C	other	other	other	other	other	other	other	other
YGL042C	YGL042C	other	other	other	other	other	other	other	other
YGL043W	DST1	other	other	other	other	other	other	other	other
YGL044C	RNA15	other	other	other	other	other	other	other	other
YGL047W	ALG13	other	other	other	other	other	NA	other	other
YGL048C	RPT6	other	other	other	other	other	other	other	other
YGL049C	TIF4632	other	other	other	other	other	other	other	other
YGL050W	TYW3	other	other	other	other	other	other	other	unrestored
YGL052W	YGL052W	other	other	other	other	other	other	other	other
YGL053W	PRM8	other	other	other	unrestored	other	other	other	other
YGL054C	ERV14	other	other	other	other	other	other	other	other
YGL056C	SDS23	other	other	other	other	other	other	other	other
YGL057C	GEP7	other	other	other	other	other	other	other	other
YGL058W	RAD6	other	other	other	other	other	other	other	other
YGL059W	PKP2	other	other	other	other	other	other	other	other
YGL060W	YBP2	other	other	other	other	other	other	other	other
YGL061C	DUO1	other	other	other	other	other	other	other	other
YGL063W	PUS2	other	other	other	other	other	other	other	other
YGL064C	MRH4	other	other	other	other	other	other	other	other
YGL065C	ALG2	other	other	other	other	other	other	other	other
YGL066W	SGF73	other	other	other	other	other	other	other	other
YGL067W	NPY1	other	other	other	other	other	other	other	other
YGL069C	YGL069C	other	other	other	other	other	other	other	other
YGL070C	RPB9	other	other	other	other	unrestored	other	other	other
YGL071W	AFT1	other	other	other	other	other	NA	other	other
YGL074C	YGL074C	other	other	other	other	other	other	other	other
YGL075C	MPS2	other	other	other	other	other	other	other	other
YGL079W	YGL079W	other	other	other	other	other	other	other	other
YGL080W	FMP37	other	other	other	other	other	other	other	other
YGL081W	YGL081W	other	other	other	other	other	NA	other	other
YGL082W	YGL082W	other	other	other	other	other	other	other	other
YGL085W	LCL3	other	other	other	other	other	other	other	other
YGL086W	MAD1	other	other	other	other	other	other	other	other
YGL087C	MMS2	other	other	other	other	other	other	other	other
YGL089C	MF(ALPHA)2	other	other	other	other	other	other	other	other
YGL090W	LIF1	other	other	other	other	other	other	other	other
YGL091C	NBP35	other	other	other	other	other	other	other	other
YGL092W	NUP145	other	other	other	other	other	other	other	other
YGL093W	SPC105	other	other	other	other	other	other	other	other
YGL094C	PAN2	other	other	other	other	other	other	other	other
YGL095C	VPS45	other	other	other	other	other	other	other	other
YGL098W	USE1	other	other	other	other	other	other	other	other
YGL099W	LSG1	other	other	other	other	other	other	other	other
YGL100W	SEH1	other	other	other	other	other	other	other	other
YGL103W	RPL28	other	other	other	other	other	other	other	other
YGL105W	ARC1	other	other	other	other	other	other	other	other
YGL106W	MLC1	other	other	other	other	other	other	other	other
YGL107C	RMD9	other	other	other	unrestored	other	other	other	other
YGL108C	YGL108C	other	other	other	other	other	other	other	other
YGL109W	YGL109W	other	other	other	other	other	other	other	other
YGL110C	CUE3	other	other	other	other	other	other	other	other
YGL111W	NSA1	other	other	other	other	other	other	other	other
YGL112C	TAF6	other	other	other	other	other	other	other	other
YGL113W	SLD3	other	other	other	other	other	other	other	other
YGL114W	YGL114W	other	other	other	other	other	other	other	other
YGL115W	SNF4	other	other	other	other	other	NA	other	other
YGL116W	CDC20	other	other	other	other	other	other	other	other
YGL117W	YGL117W	other	other	restored	other	other	other	other	other
YGL118C	YGL118C	other	other	other	other	other	other	other	other
YGL119W	ABC1	other	other	other	other	other	other	other	other
YGL122C	NAB2	other	other	other	other	other	other	other	other
YGL123W	RPS2	other	other	other	other	other	other	other	other
YGL124C	MON1	other	other	other	other	other	other	other	other
YGL125W	MET13	other	other	other	other	other	other	other	other
YGL126W	SCS3	other	other	other	other	other	other	other	other
YGL127C	SOH1	other	other	other	other	other	other	other	other
YGL128C	CWC23	other	other	other	other	other	other	other	other
YGL129C	RSM23	other	other	other	other	other	other	other	other
YGL130W	CEG1	other	other	other	other	other	other	other	other
YGL131C	SNT2	other	other	other	other	other	other	other	other
YGL132W	YGL132W	other	other	other	other	other	other	other	other
YGL133W	ITC1	other	other	other	other	other	other	other	other
YGL135W	RPL1B	other	other	other	other	other	other	other	other
YGL136C	MRM2	other	other	other	other	other	other	other	other
YGL137W	SEC27	other	other	other	other	other	other	other	other
YGL138C	YGL138C	other	other	other	other	other	other	other	other
YGL139W	FLC3	other	other	other	other	other	NA	other	other
YGL140C	YGL140C	other	other	other	other	other	other	other	other
YGL142C	GPI10	other	other	other	other	other	other	other	other
YGL143C	MRF1	other	other	other	unrestored	other	NA	other	other
YGL145W	TIP20	other	other	other	other	other	other	other	other
YGL148W	ARO2	other	other	other	other	other	other	other	other
YGL149W	YGL149W	unrestored	other	other	other	other	other	other	other
YGL150C	INO80	other	other	other	other	other	other	other	other
YGL151W	NUT1	other	other	other	other	other	other	other	other
YGL152C	YGL152C	other	other	other	other	other	other	other	other
YGL153W	PEX14	other	other	other	other	other	other	other	other
YGL154C	LYS5	other	other	other	other	other	other	other	other
YGL155W	CDC43	other	other	other	other	other	other	other	other
YGL157W	ARI1	other	unrestored	other	other	other	NA	other	other
YGL158W	RCK1	other	other	other	other	other	other	other	other
YGL159W	YGL159W	other	other	other	other	other	other	other	unrestored
YGL160W	AIM14	other	other	other	other	other	other	other	other
YGL161C	YIP5	other	other	other	other	other	other	other	other
YGL162W	SUT1	other	other	other	other	other	other	other	other
YGL163C	RAD54	other	other	other	other	other	other	other	other
YGL164C	YRB30	other	other	other	other	other	other	other	other
YGL165C	YGL165C	other	other	other	other	other	other	other	other
YGL167C	PMR1	other	other	other	other	other	other	other	other
YGL168W	HUR1	other	other	other	other	other	other	other	other
YGL170C	SPO74	other	other	other	other	other	other	other	other
YGL171W	ROK1	other	other	other	other	other	other	other	other
YGL172W	NUP49	other	other	other	other	other	other	other	other
YGL174W	BUD13	other	other	other	other	other	other	other	other
YGL175C	SAE2	other	other	other	other	other	NA	other	unrestored
YGL176C	YGL176C	other	other	other	other	other	other	other	other
YGL177W	YGL177W	other	other	other	other	other	other	other	other
YGL178W	MPT5	other	other	other	other	other	NA	other	other
YGL179C	TOS3	other	other	other	other	other	other	other	other
YGL181W	GTS1	other	other	other	other	other	other	other	other
YGL182C	YGL182C	other	other	other	other	other	other	other	other
YGL183C	MND1	other	other	other	other	other	other	other	other
YGL184C	STR3	other	other	other	other	other	other	other	other
YGL186C	TPN1	other	other	other	other	other	other	other	other
YGL187C	COX4	other	other	other	unrestored	other	other	other	other
YGL188C	YGL188C	other	other	other	unrestored	other	NA	other	other
YGL189C	RPS26A	other	other	other	other	other	other	other	other
YGL192W	IME4	other	other	other	other	other	other	other	other
YGL193C	YGL193C	other	other	other	other	other	other	other	other
YGL194C	HOS2	other	other	other	other	other	other	other	other
YGL195W	GCN1	other	other	other	other	other	other	other	other
YGL196W	DSD1	other	other	other	other	other	other	other	other
YGL197W	MDS3	other	other	other	other	other	other	other	other
YGL198W	YIP4	other	other	other	other	other	other	other	other
YGL200C	EMP24	other	other	other	other	other	other	other	other
YGL201C	MCM6	other	other	other	other	other	other	other	other
YGL202W	ARO8	other	other	other	other	other	other	other	other
YGL203C	KEX1	other	other	other	other	other	other	other	other
YGL204C	YGL204C	other	other	other	other	other	other	other	unrestored
YGL206C	CHC1	other	other	other	unrestored	other	other	other	other
YGL209W	MIG2	other	other	other	other	other	NA	other	other
YGL210W	YPT32	other	other	other	other	other	other	other	other
YGL211W	NCS6	other	other	other	other	other	other	other	other
YGL212W	VAM7	other	other	other	other	other	other	other	other
YGL214W	YGL214W	other	other	other	other	other	other	other	other
YGL215W	CLG1	other	other	other	other	other	other	other	other
YGL216W	KIP3	other	other	other	other	other	other	other	other
YGL217C	YGL217C	other	other	other	other	other	other	other	other
YGL218W	YGL218W	other	other	other	other	other	other	other	other
YGL219C	MDM34	other	other	unrestored	other	other	other	other	other
YGL220W	FRA2	other	other	other	other	other	other	other	other
YGL221C	NIF3	other	other	other	other	other	other	other	other
YGL222C	EDC1	other	other	other	other	other	other	other	other
YGL224C	SDT1	other	other	other	unrestored	other	other	other	other
YGL226C-A	OST5	other	other	other	other	other	other	other	other
YGL226W	MTC3	other	other	other	other	other	other	other	other
YGL228W	SHE10	other	other	other	other	other	other	other	other
YGL230C	YGL230C	other	other	other	other	other	NA	other	other
YGL231C	EMC4	other	other	other	other	other	other	other	other
YGL232W	TAN1	other	other	other	other	other	other	other	unrestored
YGL233W	SEC15	other	other	other	other	other	other	other	other
YGL234W	ADE5,7	other	other	other	other	other	other	other	other
YGL235W	YGL235W	other	other	other	other	other	other	other	other
YGL237C	HAP2	other	other	other	other	other	other	other	other
YGL239C	YGL239C	other	other	other	other	other	other	other	other
YGL240W	DOC1	other	other	other	other	other	NA	other	other
YGL241W	KAP114	other	other	other	other	other	other	other	other
YGL242C	YGL242C	other	other	other	other	other	other	other	other
YGL243W	TAD1	other	other	other	other	other	other	other	other
YGL244W	RTF1	other	other	other	other	other	other	other	other
YGL245W	GUS1	other	other	other	other	other	other	other	other
YGL247W	BRR6	other	other	other	other	other	other	other	other
YGL249W	ZIP2	other	other	other	other	other	other	other	other
YGL250W	RMR1	other	other	other	other	other	other	other	other
YGL252C	RTG2	other	other	other	other	other	other	other	other
YGL254W	FZF1	other	other	other	other	other	other	other	other
YGL257C	MNT2	other	other	other	other	other	other	other	other
YGL258W	VEL1	other	other	other	other	other	other	other	other
YGL258W-A	YGL258W-A	other	other	other	other	other	other	other	other
YGL259W	YPS5	other	other	other	other	other	other	other	other
YGL261C	PAU11	other	other	other	other	other	NA	other	other
YGL262W	YGL262W	other	other	other	other	other	other	other	other
YGL263W	COS12	other	other	other	unrestored	other	unrestored	other	other
YGR001C	AML1	other	other	other	other	other	other	other	other
YGR002C	SWC4	other	other	other	other	other	other	other	other
YGR003W	CUL3	other	other	other	other	other	other	other	other
YGR004W	PEX31	other	other	other	other	other	other	other	other
YGR005C	TFG2	other	other	other	other	other	other	other	other
YGR006W	PRP18	other	other	other	other	other	other	other	other
YGR007W	MUQ1	other	other	other	other	other	other	other	other
YGR009C	SEC9	other	other	other	other	other	other	other	other
YGR010W	NMA2	other	other	other	other	other	other	other	other
YGR011W	YGR011W	other	other	other	other	other	other	other	other
YGR012W	YGR012W	other	other	other	other	other	other	other	other
YGR014W	MSB2	other	other	other	other	other	NA	other	other
YGR015C	YGR015C	other	other	other	other	other	other	other	other
YGR016W	YGR016W	other	other	other	other	other	other	other	other
YGR017W	YGR017W	other	other	other	other	other	other	other	other
YGR018C	YGR018C	other	other	other	other	other	other	other	other
YGR021W	HAH1	other	other	other	other	other	other	unrestored	other
YGR022C	YGR022C	other	other	other	other	other	other	other	other
YGR023W	MTL1	other	other	other	other	other	other	other	other
YGR024C	THG1	other	other	other	other	other	other	other	other
YGR025W	YGR025W	other	other	other	unrestored	other	other	other	other
YGR026W	YGR026W	other	other	other	other	other	other	other	other
YGR027C	RPS25A	other	other	other	other	other	other	other	other
YGR028W	MSP1	other	other	other	unrestored	other	other	other	other
YGR029W	ERV1	other	other	other	other	other	other	other	other
YGR030C	POP6	other	other	other	other	other	other	other	other
YGR031W	YGR031W	other	other	other	other	other	other	other	other
YGR033C	TIM21	other	other	other	other	other	other	other	other
YGR035C	YGR035C	other	other	other	other	other	unrestored	other	other
YGR037C	ACB1	other	other	other	other	other	other	other	other
YGR039W	YGR039W	other	other	other	other	other	NA	other	other
YGR040W	KSS1	other	other	other	other	other	other	other	other
YGR041W	BUD9	other	other	other	other	other	other	other	other
YGR042W	YGR042W	other	other	other	other	other	other	other	other
YGR044C	RME1	other	other	other	other	other	other	other	other
YGR045C	YGR045C	other	other	other	other	other	other	other	other
YGR046W	TAM41	other	other	other	other	other	other	other	other
YGR047C	TFC4	other	other	other	other	other	other	other	other
YGR048W	UFD1	other	other	other	other	other	other	other	other
YGR049W	SCM4	other	unrestored	other	unrestored	other	other	other	other
YGR050C	YGR050C	other	other	other	other	other	other	other	other
YGR051C	YGR051C	other	other	other	other	other	other	other	other
YGR052W	FMP48	other	other	other	other	other	NA	unrestored	restored
YGR055W	MUP1	other	other	other	unrestored	other	NA	other	other
YGR056W	RSC1	other	other	other	other	other	other	other	other
YGR057C	LST7	other	other	other	other	other	other	other	other
YGR058W	PEF1	other	other	other	other	other	other	other	other
YGR059W	SPR3	other	other	other	other	other	other	other	other
YGR060W	ERG25	other	other	other	unrestored	other	other	other	other
YGR064W	YGR064W	other	other	other	other	other	other	other	other
YGR065C	VHT1	other	other	other	other	other	other	other	other
YGR066C	YGR066C	other	unrestored	restored	other	other	NA	other	other
YGR067C	YGR067C	other	other	other	other	other	other	other	other
YGR068C	ART5	other	other	other	other	other	other	other	other
YGR069W	YGR069W	other	other	other	other	other	other	other	other
YGR071C	YGR071C	other	other	other	other	other	other	other	other
YGR072W	UPF3	other	other	other	other	other	other	other	other
YGR073C	YGR073C	other	other	other	other	other	other	other	other
YGR074W	SMD1	other	other	other	other	other	other	other	other
YGR075C	PRP38	other	other	other	other	other	other	other	other
YGR077C	PEX8	other	other	other	other	other	other	other	other
YGR078C	PAC10	other	other	other	other	other	other	other	other
YGR079W	YGR079W	other	other	other	other	other	NA	other	other
YGR080W	TWF1	other	other	other	other	other	other	other	other
YGR083C	GCD2	other	other	other	other	other	other	other	other
YGR086C	PIL1	other	other	other	other	other	other	other	other
YGR089W	NNF2	other	other	other	other	other	other	other	other
YGR090W	UTP22	other	other	other	other	other	other	other	other
YGR091W	PRP31	other	other	other	other	other	other	other	other
YGR093W	DRN1	other	other	other	other	other	other	other	other
YGR094W	VAS1	other	other	other	other	other	other	other	other
YGR095C	RRP46	other	other	other	other	other	other	other	other
YGR096W	TPC1	other	other	other	other	other	other	other	other
YGR097W	ASK10	other	other	other	other	other	other	other	other
YGR098C	ESP1	other	other	other	other	other	other	other	other
YGR099W	TEL2	other	other	other	other	other	other	other	other
YGR100W	MDR1	other	other	other	other	other	other	other	other
YGR101W	PCP1	other	other	other	other	other	other	other	other
YGR103W	NOP7	other	other	other	other	other	other	other	other
YGR104C	SRB5	other	other	other	other	other	other	other	unrestored
YGR105W	VMA21	other	other	other	other	other	other	other	unrestored
YGR106C	VOA1	other	other	other	other	other	other	other	other
YGR107W	YGR107W	other	other	other	other	other	NA	other	other
YGR108W	CLB1	other	other	other	unrestored	other	NA	other	unrestored
YGR109W-A	YGR109W-A	other	other	other	restored	other	other	other	other
YGR109W-B	YGR109W-B	other	other	other	restored	other	other	other	other
YGR111W	YGR111W	other	other	other	other	other	NA	other	other
YGR112W	SHY1	other	other	other	other	other	other	other	other
YGR113W	DAM1	other	other	other	other	other	other	other	other
YGR114C	YGR114C	other	other	other	other	other	other	other	other
YGR115C	YGR115C	other	other	other	other	other	other	other	other
YGR116W	SPT6	other	other	other	unrestored	other	other	other	other
YGR118W	RPS23A	other	other	other	unrestored	other	other	other	other
YGR119C	NUP57	other	other	other	other	other	other	other	other
YGR120C	COG2	other	other	other	other	other	other	other	other
YGR122W	YGR122W	other	other	other	other	other	other	other	other
YGR124W	ASN2	other	other	other	other	other	other	other	other
YGR125W	YGR125W	other	other	other	other	other	other	other	other
YGR126W	YGR126W	other	other	other	other	other	other	other	other
YGR129W	SYF2	other	other	other	other	other	other	other	other
YGR131W	YGR131W	other	other	other	other	other	other	other	other
YGR132C	PHB1	other	other	other	other	other	other	other	other
YGR134W	CAF130	other	other	other	other	other	other	other	other
YGR135W	PRE9	other	other	other	other	other	other	other	other
YGR136W	LSB1	other	other	other	other	other	other	other	other
YGR137W	YGR137W	other	other	other	other	other	other	other	other
YGR139W	YGR139W	other	other	other	other	other	other	other	other
YGR140W	CBF2	other	other	other	other	other	other	other	other
YGR141W	VPS62	other	other	other	other	other	other	other	other
YGR146C	YGR146C	other	other	other	other	other	NA	other	other
YGR147C	NAT2	other	other	other	other	other	other	other	other
YGR149W	YGR149W	other	other	other	other	other	other	other	other
YGR150C	CCM1	other	other	other	other	other	other	other	other
YGR151C	YGR151C	other	other	other	other	other	other	other	other
YGR153W	YGR153W	other	other	other	other	other	NA	other	unrestored
YGR155W	CYS4	other	other	other	other	other	NA	other	other
YGR156W	PTI1	other	other	other	other	other	other	other	other
YGR157W	CHO2	other	other	other	other	other	other	other	other
YGR160W	YGR160W	other	other	other	other	other	NA	other	other
YGR161C-D	YGR161C-D	other	restored	other	other	other	other	other	restored
YGR162W	TIF4631	other	other	other	other	other	other	other	other
YGR163W	GTR2	other	other	other	other	other	other	other	other
YGR164W	YGR164W	other	other	other	other	other	other	other	other
YGR165W	MRPS35	other	other	other	unrestored	other	other	other	other
YGR166W	KRE11	other	other	other	other	other	other	other	other
YGR167W	CLC1	other	other	other	other	other	other	other	other
YGR168C	YGR168C	other	other	other	other	other	NA	other	other
YGR170W	PSD2	other	other	other	other	other	other	other	other
YGR171C	MSM1	other	other	other	other	other	other	other	other
YGR174C	CBP4	other	other	other	unrestored	other	other	other	other
YGR175C	ERG1	other	other	other	other	other	other	other	other
YGR176W	YGR176W	other	other	other	other	other	other	other	other
YGR178C	PBP1	other	other	other	other	other	other	other	other
YGR179C	OKP1	other	other	other	other	other	other	other	other
YGR180C	RNR4	other	other	other	other	other	NA	unrestored	other
YGR182C	YGR182C	other	other	other	other	other	other	unrestored	other
YGR183C	QCR9	other	other	other	other	other	NA	unrestored	other
YGR188C	BUB1	other	other	other	other	other	other	other	other
YGR189C	CRH1	other	other	other	other	other	other	other	other
YGR190C	YGR190C	other	other	other	other	other	other	other	other
YGR191W	HIP1	other	other	other	other	other	other	other	other
YGR193C	PDX1	other	other	other	other	other	other	other	other
YGR197C	SNG1	other	other	other	other	other	NA	other	other
YGR198W	YPP1	other	other	other	other	other	NA	other	other
YGR199W	PMT6	other	other	other	other	other	other	other	other
YGR200C	ELP2	other	other	other	other	other	other	other	other
YGR201C	YGR201C	other	other	other	other	other	other	other	other
YGR202C	PCT1	other	other	other	other	unrestored	other	other	other
YGR204W	ADE3	other	other	other	other	other	other	other	other
YGR205W	TDA10	other	other	other	other	other	other	other	other
YGR206W	MVB12	other	other	other	other	other	other	other	other
YGR207C	CIR1	other	other	other	other	other	other	other	other
YGR210C	YGR210C	other	other	other	other	other	other	other	other
YGR211W	ZPR1	other	other	other	other	other	NA	other	other
YGR212W	SLI1	other	other	other	other	other	NA	other	other
YGR213C	RTA1	other	other	other	restored	other	NA	other	other
YGR214W	RPS0A	other	other	other	other	other	other	other	other
YGR216C	GPI1	other	other	other	other	other	other	other	other
YGR217W	CCH1	other	other	other	other	other	other	other	other
YGR218W	CRM1	other	other	other	other	other	NA	other	other
YGR219W	YGR219W	other	other	other	other	other	other	other	other
YGR220C	MRPL9	other	other	other	unrestored	other	other	other	other
YGR222W	PET54	other	other	other	other	other	other	other	other
YGR223C	HSV2	other	other	other	other	other	other	other	other
YGR224W	AZR1	other	other	other	other	other	other	other	other
YGR225W	AMA1	other	other	other	other	other	NA	other	other
YGR226C	YGR226C	other	other	other	other	other	other	other	other
YGR228W	YGR228W	other	other	other	other	other	other	other	other
YGR229C	SMI1	other	other	other	other	other	other	other	other
YGR231C	PHB2	other	other	other	other	other	other	other	other
YGR232W	NAS6	other	other	other	other	other	other	other	other
YGR233C	PHO81	other	other	other	other	other	other	other	other
YGR234W	YHB1	other	other	other	unrestored	other	NA	other	restored
YGR235C	YGR235C	other	other	other	other	other	other	other	other
YGR237C	YGR237C	other	other	other	other	other	other	other	other
YGR238C	KEL2	other	other	other	other	other	other	other	other
YGR239C	PEX21	other	other	other	other	other	other	other	other
YGR240C	PFK1	other	other	other	other	other	other	other	other
YGR241C	YAP1802	other	other	other	other	other	other	other	other
YGR242W	YGR242W	other	other	other	other	other	other	other	other
YGR243W	FMP43	other	other	other	restored	other	other	other	other
YGR245C	SDA1	other	other	other	other	other	other	other	other
YGR246C	BRF1	other	other	other	other	other	other	other	other
YGR247W	CPD1	other	other	other	other	other	other	other	other
YGR249W	MGA1	other	other	other	other	other	other	other	other
YGR251W	YGR251W	other	other	other	other	other	other	other	other
YGR252W	GCN5	other	other	other	other	other	other	other	other
YGR253C	PUP2	other	other	other	other	other	other	other	other
YGR254W	ENO1	other	other	other	other	other	NA	other	other
YGR255C	COQ6	other	other	other	other	other	other	other	other
YGR257C	MTM1	other	other	other	other	other	other	other	other
YGR259C	YGR259C	other	other	other	other	other	NA	other	other
YGR260W	TNA1	other	other	other	other	other	NA	other	unrestored
YGR261C	APL6	other	other	other	other	other	other	other	other
YGR263C	SAY1	other	other	other	other	other	other	other	other
YGR265W	YGR265W	other	other	other	other	other	other	other	other
YGR266W	YGR266W	other	other	other	other	other	other	other	other
YGR267C	FOL2	other	other	other	other	other	other	other	other
YGR269W	YGR269W	other	other	other	other	other	other	other	other
YGR271C-A	EFG1	other	other	other	other	other	other	other	other
YGR271W	SLH1	other	other	other	other	other	other	other	other
YGR272C	YGR272C	other	other	other	other	other	other	other	other
YGR273C	IBI1	other	other	other	other	other	other	other	other
YGR274C	TAF1	other	other	other	other	other	other	other	other
YGR275W	RTT102	other	other	other	other	other	other	other	other
YGR276C	RNH70	other	other	other	other	other	other	other	other
YGR277C	CAB4	other	other	other	other	other	other	other	other
YGR278W	CWC22	other	other	other	other	other	other	other	other
YGR279C	SCW4	other	other	other	other	other	other	other	other
YGR280C	PXR1	other	other	other	other	other	other	other	other
YGR281W	YOR1	other	other	other	other	other	other	other	other
YGR282C	BGL2	other	other	other	other	other	other	other	other
YGR284C	ERV29	other	other	other	other	other	other	other	other
YGR285C	ZUO1	other	other	other	other	other	other	other	other
YGR287C	YGR287C	other	other	other	other	other	NA	other	other
YGR288W	MAL13	other	other	other	other	other	other	other	other
YGR289C	MAL11	other	other	other	other	other	NA	other	other
YGR290W	YGR290W	other	other	other	other	other	other	other	other
YGR291C	YGR291C	other	other	other	other	other	other	other	other
YGR292W	MAL12	other	other	other	unrestored	other	NA	other	other
YGR293C	YGR293C	other	other	other	other	other	other	other	other
YGR295C	COS6	other	other	other	other	other	other	other	other
YHL002W	HSE1	other	other	other	other	other	other	other	other
YHL005C	YHL005C	other	other	other	other	other	other	other	other
YHL006C	SHU1	other	other	other	other	other	other	other	other
YHL007C	STE20	other	other	other	other	other	other	other	other
YHL009C	YAP3	other	other	other	other	other	other	other	other
YHL009W-B	YHL009W-B	other	other	other	other	other	other	other	other
YHL010C	ETP1	other	other	other	other	other	other	other	other
YHL012W	YHL012W	other	other	other	other	unrestored	NA	other	other
YHL013C	OTU2	other	other	other	other	other	other	other	other
YHL014C	YLF2	other	other	other	other	other	other	other	other
YHL016C	DUR3	other	other	other	other	other	NA	other	other
YHL018W	YHL018W	other	other	other	other	other	other	other	other
YHL019C	APM2	other	other	other	other	other	other	other	other
YHL020C	OPI1	other	other	other	other	other	other	other	other
YHL022C	SPO11	other	other	other	other	other	NA	other	other
YHL023C	NPR3	other	other	other	other	other	other	other	other
YHL025W	SNF6	other	other	other	other	other	other	other	other
YHL026C	YHL026C	other	other	other	other	other	other	other	other
YHL028W	WSC4	other	other	other	other	other	NA	other	other
YHL029C	OCA5	other	other	other	other	other	NA	other	other
YHL030W	ECM29	other	other	other	other	other	other	other	other
YHL031C	GOS1	other	other	other	other	other	other	other	other
YHL032C	GUT1	other	other	other	other	other	NA	other	other
YHL034C	SBP1	other	other	other	other	other	other	other	other
YHL035C	VMR1	other	unrestored	restored	other	other	other	other	other
YHL036W	MUP3	other	other	other	other	other	other	other	other
YHL037C	YHL037C	other	other	other	other	other	other	other	other
YHL038C	CBP2	other	other	other	other	other	other	other	other
YHL039W	YHL039W	other	other	other	other	other	other	other	other
YHL040C	ARN1	other	unrestored	restored	other	unrestored	NA	restored	restored
YHL041W	YHL041W	other	other	other	other	other	other	other	other
YHL042W	YHL042W	other	other	other	other	other	other	other	other
YHL043W	ECM34	other	other	other	other	other	other	other	other
YHL044W	YHL044W	other	other	other	other	other	other	other	other
YHL045W	YHL045W	other	other	other	other	other	NA	other	other
YHL047C	ARN2	other	unrestored	restored	restored	unrestored	other	restored	other
YHL048W	COS8	other	other	other	other	other	NA	other	other
YHL049C	YHL049C	other	other	other	other	other	NA	other	other
YHR001W	OSH7	other	other	other	other	other	other	other	other
YHR001W-A	QCR10	other	other	other	unrestored	other	NA	unrestored	other
YHR002W	LEU5	other	other	other	other	other	other	other	other
YHR003C	YHR003C	other	other	other	other	other	other	other	other
YHR004C	NEM1	other	other	other	other	other	other	other	other
YHR005C	GPA1	other	other	other	other	other	other	other	other
YHR007C	ERG11	other	other	other	other	other	other	other	other
YHR009C	TDA3	other	other	other	other	other	other	other	other
YHR011W	DIA4	other	other	other	other	other	other	other	other
YHR012W	VPS29	other	other	other	other	other	other	other	other
YHR014W	SPO13	other	other	other	other	other	other	other	other
YHR015W	MIP6	unrestored	other	other	other	other	other	other	unrestored
YHR016C	YSC84	other	other	other	other	other	other	other	other
YHR017W	YSC83	other	other	other	other	other	other	other	other
YHR018C	ARG4	other	other	unrestored	other	other	other	other	other
YHR019C	DED81	other	other	other	other	other	other	other	other
YHR020W	YHR020W	other	other	other	other	other	other	other	other
YHR021W-A	ECM12	other	other	other	other	other	other	other	other
YHR022C	YHR022C	other	other	other	other	other	NA	other	other
YHR023W	MYO1	other	other	other	other	other	other	other	other
YHR024C	MAS2	other	other	other	other	other	other	other	other
YHR026W	PPA1	other	other	other	other	other	other	other	other
YHR027C	RPN1	other	other	other	other	other	other	other	other
YHR028C	DAP2	other	other	other	other	other	other	other	other
YHR029C	YHI9	other	other	other	other	other	other	other	unrestored
YHR031C	RRM3	other	other	other	other	other	other	other	other
YHR032W	YHR032W	other	other	other	other	other	other	other	other
YHR035W	YHR035W	other	other	other	other	other	other	other	other
YHR036W	BRL1	other	other	other	other	other	other	other	other
YHR037W	PUT2	other	other	other	other	unrestored	other	other	other
YHR039C	MSC7	other	other	other	other	other	NA	other	other
YHR039C-A	VMA10	other	other	other	other	other	other	other	other
YHR040W	BCD1	other	other	other	other	other	other	other	other
YHR041C	SRB2	other	other	other	other	other	other	other	other
YHR042W	NCP1	other	other	other	unrestored	other	NA	other	other
YHR044C	DOG1	other	other	other	other	other	other	restored	other
YHR046C	INM1	other	other	other	other	other	other	other	other
YHR047C	AAP1	other	other	other	other	unrestored	other	unrestored	unrestored
YHR048W	YHK8	other	other	other	other	other	other	other	other
YHR049C-A	YHR049C-A	other	other	other	other	other	other	other	other
YHR050W	SMF2	other	other	other	other	other	other	other	other
YHR051W	COX6	other	other	other	other	other	other	other	other
YHR054C	YHR054C	other	other	other	other	other	other	other	other
YHR057C	CPR2	other	other	other	other	other	other	other	other
[truncated: 2,705 more rows]
